# Supplementary material
Source: publisher figshare collection journal article supplement (https://gsapubs.figshare.com/ndownloader/files/23316302)
Supplement: Supplementary file 1 [file 23316302]

## Sheet: Whole-Rock
Table Vezinet et al., 2019 (Geology)
	This study	Moyen & Martin (2012)	Moyen & Martin (2012)	Moyen & Martin (2012)
	LA9-01	Low HREE TTG	Mid HREE TTG	High HREE TTG
SiO2 (wt%)	71.89	71.12	68.29	68.81
TiO2	0.229	0.25	0.4	0.42
Al2O3	15.728	15.55	15.65	15.21
Fe2O3	1.675
FeOt	1.50582	1.83	3.02	3.31
MnO	0.0179	0.04	0.05	0.06
MgO	0.714	0.79	1.33	1.29
CaO	3.718	2.63	3.44	3.24
Na2O	4.813	5.24	4.7	4.47
K2O	1.098	1.71	1.64	1.76
P2O5	0.22	0.09	0.14	0.13
L.O.I.	0.67	N/A	N/A	N/A
Sum	100.604	99.25	98.66	98.7
K2O/Na2O	0.228132	0.326336	0.348936	0.393736
FeOt+MgO	2.21983	2.62	4.35	4.6
Si (Mol%)	1.19657	1.18375	1.13665	1.14531
Ti	0.0028673	0.00313024	0.00500839	0.00525881
Al	0.308513	0.305022	0.306983	0.298352
Fe2+	0.0209596	0.0254719	0.0420355	0.046072
Mn	0.000252335	0.000563877	0.000704847	0.000845816
Mg	0.0177152	0.0196008	0.0329989	0.0320064
Ca	0.0663012	0.0468995	0.0613438	0.0577773
Na	0.155311	0.16909	0.151665	0.144243
K	0.0233121	0.0363057	0.0348195	0.0373673
P	0.00310121	0.00126868	0.0019735	0.00183253
Ca/(Ca+Na)	0.299177	0.217138	0.287988	0.285998
Fe+Mg	0.0386748	0.0450727	0.0750344	0.0780785
Fe+Mg+Ti	0.0415421	0.0482029	0.0800428	0.0833373
Mg#	0.458055	0.434872	0.439783	0.409926
A/CNK	0.991285	1.01948	0.992921	1.004
A/NK	1.72717	1.48504	1.64616	1.64282
K/Na	0.1501	0.214713	0.229583	0.259059
Rb (ppm)	36.1	46.44	54.98	70.58
Ba	256.5	541.81	531.58	446.62
Nb	1.255	2.91	5.25	8.07
Ta	0.043	0.52	0.81	0.79
Sr	370.5	583.32	483.31	327.65
Zr	71.25	113.6	143.23	173.53
Y	0.563	5.44	8.31	18.24
Hf	2.046	3.01	4.17	4.51
Ni	8.624	86.24	21.56	15.21
Cr	6.346	42.49	38.16	27.59
V	17.1	22.75	36.48	41.82
U	0.107	0.83	1.31	1.83
Th	0.079	3.86	6.16	7.16
Sc	1.15
Co	4.806
Cu	14.8
Zn	24.19
Mo	bdl
Cs	0.231
La	8.343	16.35	26.88	31.03
Ce	11.6	28.72	52.87	57.91
Pr	0.979
Nd	3.307	11.64	19.31	22.51
Sm	0.37	1.82	3.18	3.76
Eu	0.586	0.59	0.91	0.95
Gd	0.239	1.24	2.43	3.15
Tb	0.025
Dy	0.126	0.84	1.63	2.68
Ho	0.022
Er	0.062
Tm	0.008	0.41	0.81	1.39
Yb	0.065	0.38	0.7	1.18
Lu	0.012	0.07	0.13	0.19
Eu/Eu*	5.90171	1.17621	0.980404	0.826713
Sr/Y	658.082	107.228	58.16	17.9633
(La)N	21.7266	42.5781	70	80.8073
(Sm)N	1.59765	7.85872	13.7312	16.2356
(Gd)N	0.779772	4.04568	7.92822	10.2773
(Yb)N	0.282609	1.65217	3.04348	5.13043
(La/Sm)N	13.5991	5.41795	5.09789	4.97717
(Gd/Yb)N	2.75919	2.4487	2.60499	2.00321
(La/Yb)N	76.8786	25.771	23	15.7506

## Sheet: Pb-Hf-O-trace element
			Composition				Data for Tera-Wasserburg diagram3				Data for Wetherill diagram3					Dates (Ma)							Hf isotope ratios corrected from mass biais fractionation																	O isotope composition				Trace element composition (ppm)
Reference	Analysis Label1	Integration time of the U-Pb/Hf LASS analyses (second)	f206Pbc (%)2	206Pb (cps)	U (ppm)	Th/U	238U/206Pb	1S.E. (%)	207Pb/206Pb	1S.E. (%)	207Pb/235U4	1S.E. (%)	206Pb/238U	1S.E. (%)	Rho5	207Pb/206Pb	2 S.E. (abs)	206Pb/238U	2 S.E. (abs)	207Pb/235U	2 S.E. (abs)	Concordance (%)6	(176Hf/177Hf)measured7	2 S.E. (abs)	(176Lu/177Hf)measured	2 S.E. (abs)	(176Yb/177Hf)measured	2 S.E. (abs)	(178Hf/177Hf)measured	2 S.E. (abs)	εHf(0)8	2 S.E.	(176Hf/177Hf)initial9	2 S.E. (abs.)	εHf(initial)	2 S.E.	Assigned age	Total Hf (V)	Correction expressed in εHf units10	18O/16O	1S.E. (%) inter-session	δ18OVSMOW (‰)	2S.E. (‰)	P	Ca	Ti	Mn	Fe	Y
Sample LA9-01 (meta-tonalite) - This study
	2018 March, 6th
This study (i.e. Vezinet et al., 2019 - Geology)	LA9-01_1-1	9.7252	0.00189321	587000	102.5	0.407997	1.40351	1.05263	0.3351	0.566995	33.08	1.31499	0.7125	1.05263	0.19522	3640	18	3468	56	3583	26	95.2747	0.280381	5e-05	0.000448	2.7e-05	0.0129	0.00091	1.46737	9.4e-05	-85.0116	1.82522	0.280349	5.00365e-05	-2.59292	1.93016	3640	19.77	472.019	0.00201866	0.0103595	6.71436	0.207191	67.2	< L.O.D.	5.04	13	900	414
This study (i.e. Vezinet et al., 2019 - Geology)	LA9-01_1-2	31.535	0.000609057	3790000	716	0.0153846	1.6714	1.08641	0.2025	0.395062	16.73	1.37478	0.5983	1.08641	0.95094	2845.5	13	3022	52	2918	26	106.203	0.280601	4.6e-05	0.000311	2.8e-05	0.00838	0.00085	1.46733	4e-05	-77.2318	1.68486	0.280584	4.60255e-05	-13.0872	1.74639	2845.5	18.2	307.336	0.00201858	0.009428	6.67227	0.18856	54.6	150	14.8	5.2	192	395
This study (i.e. Vezinet et al., 2019 - Geology)	LA9-01_2-1	32.682	0	1520000	321	0.0458716	1.8474	1.01607	0.18795	0.319234	14.04	1.24644	0.5413	1.01607	0.90261	2723.3	10	2788	47	2752.2	24	102.376	0.280668	5.6e-05	0.00017	1.3e-05	0.00458	0.00038	1.46731	5.2e-05	-74.8625	2.0328	0.280659	5.60041e-05	-13.2843	2.07083	2723.3	18	167.972	0.00201843	0.0132648	6.59567	0.265295	54.8	< L.O.D.	1.56	< L.O.D.	51.3	216.4
This study (i.e. Vezinet et al., 2019 - Geology)	LA9-01_2-2	39.214	0	1086000	225	0.166639	1.94742	1.07108	0.18716	0.347296	13.289	1.27925	0.5135	1.07108	0.86268	2716.2	11	2671	46	2699.9	24	98.3359	0.28061	4.8e-05	0.0002769	4.1e-06	0.00746	0.00015	1.46732	4.5e-05	-76.9136	1.75423	0.280596	4.80006e-05	-15.7117	1.8014	2716.2	16.9	273.597	0.00201869	0.0112909	6.72548	0.225818	51.7	< L.O.D.	1.64	0.62	31	212
This study (i.e. Vezinet et al., 2019 - Geology)	LA9-01_2-3a	20.585	0.000363562	1724000	273	0.319285	1.40627	1.12502	0.3121	0.432554	30.61	1.33943	0.7111	1.12502	0.77651	3530	13	3462	59	3506	26	98.0737	0.280477	7.2e-05	0.0001944	3.4e-06	0.005889	5.6e-05	1.46736	6.5e-05	-81.6168	2.59636	0.280464	7.20004e-05	-1.1491	2.65116	3530	17.2	215.125	0.00202303	0.00821141	8.89285	0.164228	53.8	< L.O.D.	4.03	< L.O.D.	45	205.2
This study (i.e. Vezinet et al., 2019 - Geology)	LA9-01_3-2	15.724	0.00140445	1179000	261	0.132802	1.87688	1.03228	0.1967	0.660905	14.56	1.51099	0.5328	1.03228	0.2573	2797	21	2753	48	2786	27	98.4269	0.280653	8.6e-05	0.0001802	8.4e-06	0.00517	0.00027	1.46739	6.7e-05	-75.393	3.08887	0.280643	8.60012e-05	-12.1163	3.14323	2797	18.4	189.197	0.00201859	0.0128013	6.67841	0.256026	51.6	< L.O.D.	3.22	6.29	301	158.7
This study (i.e. Vezinet et al., 2019 - Geology)	LA9-01_6-1	16.878	0.001203	4986000	1049	0.0562366	1.8498	1.01739	0.19387	0.309486	14.535	1.23839	0.5406	1.01739	0.89783	2774.5	9.9	2786	46	2785.2	24	100.414	0.280492	5.6e-05	0.0006689	7e-06	0.01885	0.00035	1.46736	7.6e-05	-81.0863	2.03403	0.280456	5.60016e-05	-19.2961	2.0717	2774.5	20.3	690.238	0.00201859	0.0140456	6.67904	0.280911	101.2	799	26.8	39.2	747	940
This study (i.e. Vezinet et al., 2019 - Geology)	LA9-01_8-1	8.984	0.00136168	1275000	214	0.766871	1.35593	1.08475	0.3668	0.327154	37.59	1.31684	0.7375	1.08475	0.91839	3777.6	10	3561	61	3709	26	94.2662	0.280355	0.00016	0.000631	2.1e-05	0.01885	0.00051	1.46729	0.00021	-85.931	5.72029	0.280309	0.000160008	-0.742354	5.74543	3777.6	20.4	688.898	0.00201814	0.0120105	6.45335	0.240211
This study (i.e. Vezinet et al., 2019 - Geology)	LA9-01_8-2	14.114	0.000705375	3131000	635	0.147929	1.79019	1.07411	0.2164	0.831793	16.76	1.58115	0.5586	1.07411	0.66011	2952	27	2861	49	2920	31	96.9173	0.280518	5e-05	0.0001	3.2e-05	0.00267	0.00081	1.46735	5e-05	-80.1669	1.82437	0.280512	5.00329e-05	-13.1322	1.96477	2952	22.4	97.9543	0.00201896	0.011792	6.8621	0.23584	37.3	< L.O.D.	2.37	2.53	30.4	84.4
This study (i.e. Vezinet et al., 2019 - Geology)	LA9-01_11-1	27.254	0.00402886	754000	106.3	0.290782	1.37836	1.10269	0.3523	0.425773	35.31	1.30275	0.7255	1.10269	0.75393	3716	13	3516	59	3646.8	26	94.6179	0.280362	7e-05	0.000519	1.8e-05	0.01434	0.00046	1.46729	5.9e-05	-85.6835	2.52689	0.280325	7.00123e-05	-1.65596	2.58807	3716	16.7	525.452	0.00201689	0.0166087	5.83188	0.332174	99.7	< L.O.D.	23.2	71.8	3790	575
This study (i.e. Vezinet et al., 2019 - Geology)	LA9-01_13-1	13.241	0.00193282	1186000	180.6	0.672043	1.34102	1.07282	0.3521	0.397614	36.38	1.29192	0.7457	1.07282	0.86222	3715.1	12	3591	59	3676.7	26	96.6596	0.280368	0.000116	0.000529	1.6e-05	0.01545	0.00041	1.46732	0.0001	-85.4713	4.15566	0.28033	0.000116006	-1.48882	4.19136	3715.1	19.3	565.058	0.00201716	0.011316	5.96534	0.226319	78.4	96	9.9	10	530	507
This study (i.e. Vezinet et al., 2019 - Geology)	LA9-01_13-3	33.68	0.00120518	2455000	494	0.229148	1.93986	0.969932	0.19457	0.308372	13.83	1.22921	0.5155	0.969932	0.80945	2780.2	10	2680	44	2738.8	24	96.3959	0.28053	4.2e-05	4.72e-05	1.2e-06	0.001669	6.6e-05	1.46734	4.4e-05	-79.7426	1.54687	0.280527	4.20001e-05	-16.6339	1.59874	2780.2	18	60.6892	0.00201871	0.0089807	6.73518	0.179614
This study (i.e. Vezinet et al., 2019 - Geology)	LA9-01_13-4	15.434	0.00440142	1261000	264.4	0.237079	1.95848	1.37094	0.22	0.840909	15.42	1.75097	0.5106	1.37094	0.39886	2978	28	2658	58	2839	35	89.2545	0.280715	9.4e-05	0.0002424	3.3e-06	0.00734	0.00013	1.46736	9.7e-05	-73.2005	3.37111	0.280701	9.40003e-05	-5.79691	3.45299	2978	16.78	268.133	0.002019	0.0107532	6.88194	0.215064	51.6	84	8.9	23.3	1120	252.6
This study (i.e. Vezinet et al., 2019 - Geology)	LA9-01_15-1	18.172	0.00207638	1063000	164	0.581395	1.4771	1.25554	0.3309	0.559081	30.98	1.46869	0.677	1.25554	0.53798	3620	17	3333	65	3517	29	92.0718	0.280353	8e-05	0.00065	3.5e-05	0.0193	0.0011	1.46732	6.8e-05	-86.0017	2.87994	0.280308	8.0038e-05	-4.56727	2.94356	3620	18.9	705.483	0.00201737	0.0095579	6.06874	0.191158
This study (i.e. Vezinet et al., 2019 - Geology)	LA9-01_15-2	8.2189	0.00226927	955000	139.9	0.340483	1.25156	1.12641	0.3684	0.542888	40.81	1.34771	0.799	1.12641	0.71763	3784	17	3787	67	3790	27	100.079	0.280426	8.4e-05	0.000676	2.1e-05	0.01962	0.00064	1.46737	8e-05	-83.4203	3.02059	0.280377	8.40147e-05	1.8237	3.08593	3784	22.9	717.718	0.00201636	0.00881975	5.56517	0.176395	80.3	< L.O.D.	4.86	8.2	615	753
This study (i.e. Vezinet et al., 2019 - Geology)	LA9-01_16-1	29.912	0.00248686	891000	123.6	0.733676	1.36724	1.09379	0.3731	0.375235	37.73	1.2722	0.7314	1.09379	0.83859	3803.1	11	3538	58	3712.5	25	93.0294	0.280357	7.2e-05	0.000376	1.7e-05	0.01107	0.00047	1.46727	5.2e-05	-85.8603	2.59745	0.280329	7.2011e-05	0.599364	2.65436	3803.1	17.2	404.76	0.00201611	0.00786541	5.4426	0.157308	81.9	< L.O.D.	2.7	< L.O.D.	4.7	782
This study (i.e. Vezinet et al., 2019 - Geology)	LA9-01_16-2	15.916	0.00377067	1165000	166	0.791766	1.31752	1.18577	0.3712	0.431034	38.84	1.41607	0.759	1.18577	0.73354	3795	13	3639	67	3741	27	95.8893	0.280327	9.2e-05	0.000349	1.3e-05	0.01057	0.00051	1.46728	0.00012	-86.9212	3.30485	0.280301	9.20051e-05	-0.592553	3.3534	3795	20.9	386.124	0.00201652	0.007872	5.6453	0.15744	64.9	< L.O.D.	3.34	2.15	29	655.4
This study (i.e. Vezinet et al., 2019 - Geology)	LA9-01_17-1	14.58	0.0012765	2296000	360	0.290107	1.42592	1.06944	0.3082	0.389358	29.82	1.30785	0.7013	1.06944	0.86411	3511	12	3425	56	3480	26	97.5506	0.280459	6e-05	0.0003387	8.8e-06	0.01011	0.00034	1.46737	5.8e-05	-82.2533	2.17443	0.280436	6.00031e-05	-2.59039	2.23578	3511	18.6	369.493	0.00202107	0.0110369	7.91365	0.220739	48.4	< L.O.D.	< L.O.D.	< L.O.D.	17.8	290.8
This study (i.e. Vezinet et al., 2019 - Geology)	LA9-01_18-1	19.771	0.00282471	660000	100.4	0.297265	1.41643	1.34561	0.3341	0.868004	32.38	1.4824	0.706	1.34561	0.37297	3633	27	3454	79	3564	27	95.0729	0.280382	6.2e-05	0.000471	2.3e-05	0.01323	0.00077	1.46738	9.4e-05	-84.9762	2.24522	0.280349	6.20217e-05	-2.78013	2.37998	3633	18.7	484.502	0.00201777	0.011916	6.26629	0.23832	78.4	< L.O.D.	4.83	11.6	812	425
This study (i.e. Vezinet et al., 2019 - Geology)	LA9-01_18-2	11.224	0.00149173	2997000	683	0.0853242	2.01898	1.11044	0.18979	0.342484	12.98	1.34823	0.4953	1.11044	0.23773	2739.4	11	2593	49	2678	26	94.6558	0.280665	0.000144	0.0003155	4.4e-06	0.008991	9.9e-05	1.4673	0.00013	-74.9686	5.1454	0.280648	0.000144	-13.287	5.15627	2739.4	21.8	329.102	0.0020187	0.0101908	6.73041	0.203815
This study (i.e. Vezinet et al., 2019 - Geology)	LA9-01_19-1	11.075	0.00482262	674000	125.5	0.41841	1.65289	1.4876	0.2839	0.827756	23.74	2.10615	0.605	1.4876	0.90169	3383	26	3048	71	3254	42	90.0975	0.280329	0.000124	0.000458	2.9e-05	0.01342	0.00099	1.46736	0.00011	-86.8504	4.44044	0.280299	0.000124015	-10.5209	4.49918	3383	20.5	490.762	0.0020182	0.00996754	6.48294	0.199351	87	133	69	13	1440	720
This study (i.e. Vezinet et al., 2019 - Geology)	LA9-01_22-1	17.434	0.000961846	2547000	375	0.503778	1.3914	1.04355	0.3136	0.302934	31.11	1.23754	0.7187	1.04355	0.93801	3538	9.4	3491	58	3522.3	25	98.6716	0.280446	5.4e-05	0.0003279	3.8e-06	0.010424	8.9e-05	1.46733	9e-05	-82.713	1.9644	0.280424	5.40007e-05	-2.38932	2.02509	3538	16.7	380.215	0.00202218	0.0108866	8.46915	0.217733	35.6	< L.O.D.	4.73	4.43	26	572
This study (i.e. Vezinet et al., 2019 - Geology)	LA9-01_22-2	39.238	0.00077253	1810000	246	0.367242	1.37969	0.965784	0.31918	0.297638	31.74	1.22873	0.7248	0.965784	0.75205	3565	9.2	3514	53	3542.9	23	98.5694	0.280456	5.8e-05	0.0001751	5.1e-06	0.00529	0.00022	1.46729	4.7e-05	-82.3594	2.10433	0.280444	5.80011e-05	-1.01899	2.16153	3565	14.2	193.26	0.00202318	0.00818809	8.96808	0.163762	39.2	< L.O.D.	3.07	1.33	15.5	411
This study (i.e. Vezinet et al., 2019 - Geology)	LA9-01_23-1	16.306	0.00230502	610000	103	0.36075	1.60514	1.60514	0.3206	0.904554	27.44	1.54883	0.623	1.60514	0.78347	3570	27	3119	80	3398	30	87.3669	0.280341	7.8e-05	0.000427	5.9e-05	0.012	0.0018	1.46735	9.8e-05	-86.4261	2.80939	0.280312	7.81064e-05	-5.61939	2.91876	3570	19.9	439.45	0.00201739	0.0104716	6.08163	0.209432	68.3	< L.O.D.	2.66	< L.O.D.	< L.O.D.	580
This study (i.e. Vezinet et al., 2019 - Geology)	LA9-01_23-2	13.893	0.000869484	2340000	371	0.139665	1.48148	1.55556	0.303	1.65017	28.3	2.82686	0.675	1.55556	0.8906	3477	55	3324	82	3420	59	95.5997	0.280398	5.8e-05	0.000509	3.7e-05	0.01412	0.00091	1.46727	7.7e-05	-84.4104	2.10475	0.280364	5.80559e-05	-5.97514	2.51793	3477	26.52	517.319	0.00201889	0.00916182	6.82566	0.183236	66.5	< L.O.D.	2.61	< L.O.D.	5.1	480.5
This study (i.e. Vezinet et al., 2019 - Geology)	LA9-01_24-1	15.41	0.00171806	2421000	386	0.352113	1.49432	1.12074	0.2895	0.552677	26.79	1.4371	0.6692	1.12074	0.82413	3414	17	3302	56	3375	28	96.7194	0.280419	7.8e-05	0.000345	2.7e-05	0.01064	0.0005	1.46729	7.6e-05	-83.6678	2.80862	0.280396	7.80204e-05	-6.32047	2.86815	3414	18.74	388.458	0.00202188	0.0107124	8.31835	0.214248	66.1	< L.O.D.	< L.O.D.	< L.O.D.	5.6	494
This study (i.e. Vezinet et al., 2019 - Geology)	LA9-01_24-2	39.238	0.000646434	1799000	252	0.336022	1.46735	1.02715	0.3009	0.332336	28.16	1.2429	0.6815	1.02715	0.2615	3473.7	10	3350	53	3424.2	25	96.439	0.280411	6.2e-05	0.0001733	5.6e-06	0.00548	0.00023	1.46733	5.4e-05	-83.9507	2.245	0.280399	6.20012e-05	-4.78744	2.29741	3473.7	14.9	199.915	0.0020231	0.0122988	8.92441	0.245976	44	< L.O.D.	4.1	< L.O.D.	9.7	138.9
This study (i.e. Vezinet et al., 2019 - Geology)	LA9-01_25-1	39.219	0.00240572	556000	76.9	0.3003	1.39704	1.11763	0.3345	0.508221	32.95	1.33536	0.7158	1.11763	0.41667	3636	16	3478	61	3578	27	95.6546	0.280381	5.2e-05	0.000517	3.2e-05	0.0145	0.0011	1.46729	3.9e-05	-85.0116	1.89497	0.280345	5.20491e-05	-2.86022	1.98676	3636	15.5	531.039	0.00201851	0.0130524	6.63877	0.261049	48.8	< L.O.D.	2.96	< L.O.D.	12.2	207.7
This study (i.e. Vezinet et al., 2019 - Geology)	LA9-01_25-2	22.172	0.00317983	633000	91.4	0.288351	1.43596	1.14877	0.3211	0.52943	30.7	1.31922	0.6964	1.14877	0.066188	3573	16	3406	61	3509	26	95.3261	0.280359	6.8e-05	0.0004095	6.8e-06	0.01152	0.00032	1.46738	5.4e-05	-85.7896	2.45646	0.280331	6.80019e-05	-4.86379	2.52445	3573	20.1	421.858	0.00201749	0.00779973	6.13099	0.155995	75.2	< L.O.D.	3.35	< L.O.D.	4.9	524
This study (i.e. Vezinet et al., 2019 - Geology)	LA9-01_25-3	39.301	0.000969627	2460000	437	0.129366	1.83486	1.00917	0.19444	0.282864	14.582	1.2344	0.545	1.00917	0.88876	2779.2	9.3	2804	45	2788.2	23	100.892	0.280492	5e-05	1.467e-05	8.9e-07	0.000659	6.3e-05	1.4673	4.1e-05	-81.0863	1.82453	0.280491	5e-05	-17.948	1.86561	2779.2	18	23.8227	0.0020188	0.0122287	6.78422	0.244574	57	< L.O.D.	5	0.96	90	464
This study (i.e. Vezinet et al., 2019 - Geology)	LA9-01_26-1	22.515	0.00175732	1364000	206	0.328299	1.485	1.0395	0.2896	0.345304	26.86	1.28444	0.6734	1.0395	0.92918	3414.7	11	3319	55	3377.9	26	97.1974	0.28042	6e-05	0.0001922	3.5e-06	0.00567	0.00018	1.46736	5.4e-05	-83.6324	2.17472	0.280407	6.00005e-05	-5.90983	2.22974	3414.7	15.6	207.302	0.00202183	0.00873531	8.29131	0.174706	51.4	< L.O.D.	8.8	8.7	530	223
This study (i.e. Vezinet et al., 2019 - Geology)	LA9-01_26-2	26.832	0.00119904	1265000	189.3	0.282725	1.53633	0.998617	0.2817	0.514732	25.25	1.40594	0.6509	0.998617	0.89435	3371	16	3231	52	3317	27	95.8469	0.280407	5e-05	0.0001303	1.7e-06	0.003785	7e-05	1.46732	5.5e-05	-84.0922	1.82506	0.280399	5.00002e-05	-7.26409	1.90921	3371	16	138.455	0.00202242	0.00955037	8.58964	0.191007	44.3	< L.O.D.	3.45	1.51	25.4	159.1
	2017 October, 11th
This study (i.e. Vezinet et al., 2019 - Geology)	LA9_01_1	22.972	0	935000	456	0.0633312	1.85117	0.610885	0.18777	0.229004	13.809	0.579332	0.5402	0.610885	0.80283	2721.7	7.6	2784	28	2736.5	11	102.289	0.280651	3.4e-05	0.0005671	4.5e-06	0.01625	0.00037	1.4673	4e-05	-75.4637	1.27239	0.280621	3.40012e-05	-14.6631	1.32566	2721.7	14.54	594.696
This study (i.e. Vezinet et al., 2019 - Geology)	LA9_01_2	23.422	0	554000	276	0.0584795	1.93874	0.707639	0.18839	0.225596	13.21	0.719152	0.5158	0.707639	0.87823	2727.2	7.5	2681	31	2694.3	14	98.306	0.28058	3.2e-05	0.000403	1.3e-05	0.01077	0.00018	1.46727	4.7e-05	-77.9744	1.20501	0.280559	3.20074e-05	-16.7577	1.26107	2727.2	16.1	395.106
This study (i.e. Vezinet et al., 2019 - Geology)	LA9_01_3	13.984	0.000574089	2090000	880	0.114943	1.59719	0.622904	0.2795	0.286225	23.77	0.610013	0.6261	0.622904	0.59613	3359	8.9	3134	31	3258.8	12	93.3016	0.280455	2.4e-05	0.000417	1.4e-05	0.01186	0.00032	1.46738	2.7e-05	-82.3948	0.940013	0.280428	2.40175e-05	-6.49913	1.04938	3359	17.93	434.146
This study (i.e. Vezinet et al., 2019 - Geology)	LA9_01_4	30.257	0	206000	70	0.473485	1.38966	0.653141	0.371	0.229111	36.19	0.676983	0.7196	0.653141	0.86313	3794.7	6.8	3494	36	3670.9	13	92.0758	0.280355	4.4e-05	0.00065	1.7e-05	0.01835	0.00044	1.46727	3e-05	-85.931	1.61693	0.280307	4.40183e-05	-0.389156	1.69341	3794.7	11.5	671.889
This study (i.e. Vezinet et al., 2019 - Geology)	LA9_01_5	21.969	0.000120691	271500	87.4	0.357398	1.22249	0.611247	0.3827	0.248236	42.51	0.599859	0.818	0.611247	0.75014	3841.4	7.5	3853	35	3830.7	12	100.302	0.280318	4.8e-05	0.000405	1.3e-05	0.01189	0.00056	1.46727	3.6e-05	-87.2394	1.75597	0.280288	4.801e-05	0.0413569	1.82963	3841.4	16.11	434.783
This study (i.e. Vezinet et al., 2019 - Geology)	LA9_01_6	21.535	0.000314352	511000	203.1	0.375094	1.5108	0.574105	0.3029	0.214592	27.23	0.605949	0.6619	0.574105	0.74839	3484.2	6.6	3274	29	3391.6	12	93.9671	0.280317	4.6e-05	0.000495	3.2e-06	0.01455	0.00021	1.4673	4.2e-05	-87.2748	1.68647	0.280284	4.60008e-05	-8.65991	1.74678	3484.2	15.14	532.03
This study (i.e. Vezinet et al., 2019 - Geology)	LA9_01_7	14.389	0.00170235	391000	157	0.531915	1.4339	0.788644	0.2985	0.569514	28.3	0.671378	0.6974	0.788644	0.34263	3461	18	3410	42	3429.3	13	98.5264	0.280317	3.8e-05	0.000392	2.4e-05	0.012	0.001	1.46718	5.3e-05	-87.2748	1.41031	0.280291	3.80342e-05	-8.95972	1.53523	3461	17.01	438.213
This study (i.e. Vezinet et al., 2019 - Geology)	LA9_01_8	24.223	0.000185996	1438000	730	0.042337	1.91388	0.593301	0.18888	0.198539	13.466	0.556958	0.5225	0.593301	0.72641	2731.5	6.5	2709	26	2712.8	10	99.1763	0.280552	3.6e-05	0.000584	4e-06	0.0158	0.00031	1.4673	4.1e-05	-78.9646	1.34085	0.280521	3.60009e-05	-17.9914	1.3881	2731.5	16.1	579.38
This study (i.e. Vezinet et al., 2019 - Geology)	LA9_01_9	39.268	0.00397064	286000	101	0.410678	1.34463	0.631976	0.3561	0.336984	36.85	0.691995	0.7437	0.631975	0.7252	3732	10	3584	35	3688.7	14	96.0343	0.280368	3.6e-05	0.00068	1.1e-05	0.01893	0.00029	1.46733	3.3e-05	-85.4713	1.34165	0.280319	3.60097e-05	-1.47855	1.44031	3732	11.31	693.46
This study (i.e. Vezinet et al., 2019 - Geology)	LA9_01_10	24.898	0	1084000	542	0.145773	1.81127	0.615831	0.19263	0.241395	14.82	0.607287	0.5521	0.61583	0.74782	2763.7	7.9	2833	28	2803.5	12	102.508	0.280542	3.8e-05	1.002e-05	1.8e-07	0.000425	1.7e-05	1.46732	3.2e-05	-79.3182	1.40927	0.280541	3.8e-05	-16.5235	1.4589	2763.7	14.7	15.3834
This study (i.e. Vezinet et al., 2019 - Geology)	LA9_01_11	13.092	0.000938374	401000	149	0.537924	1.26839	0.697615	0.3733	0.294669	40.97	0.610203	0.7884	0.697615	0.64754	3804.2	8.7	3747	40	3794.3	12	98.4964	0.280363	6e-05	0.0008365	8.3e-06	0.02581	0.00074	1.46729	3.1e-05	-85.6481	2.17515	0.280301	6.00039e-05	-0.369687	2.23657	3804.2	17.43	942.288
This study (i.e. Vezinet et al., 2019 - Geology)	LA9_01_12	36.173	0.00162189	171000	59.5	0.327761	1.33032	0.665159	0.3616	0.290376	37.87	0.831793	0.7517	0.665159	0.90362	3755.5	9	3613	38	3715	16	96.2056	0.280324	3e-05	0.000479	1.3e-05	0.01292	0.00025	1.46732	2.4e-05	-87.0272	1.13869	0.280289	3.00154e-05	-1.97488	1.25023	3755.5	12.73	473.823
This study (i.e. Vezinet et al., 2019 - Geology)	LA9_01_13	15.823	0.0013278	430000	162	0.411523	1.23001	0.861009	0.3749	0.42678	42.36	0.743626	0.813	0.861009	0.72494	3810	13	3834	50	3827	15	100.63	0.280389	6.2e-05	0.00088	0.00023	0.0263	0.0074	1.46726	4.3e-05	-84.7287	2.24517	0.280324	6.4278e-05	0.579343	2.39439	3810	16.38	961.154
This study (i.e. Vezinet et al., 2019 - Geology)	LA9_01_14	24.603	0	1226000	655	0.169549	1.88218	0.611707	0.19086	0.167662	14.142	0.565691	0.5313	0.611707	0.83627	2749.9	5.9	2747	27	2759.1	11	99.8945	0.28059	4.2e-05	0.0010061	2.3e-06	0.02987	0.00052	1.46728	4e-05	-77.6208	1.54656	0.280537	4.2001e-05	-17.0065	1.58656	2749.9	18.19	1091.86
This study (i.e. Vezinet et al., 2019 - Geology)	LA9_01_15	39.467	0.00148298	341000	180	0.0653595	1.9425	0.58275	0.19055	0.167935	13.589	0.588711	0.5148	0.582751	0.86839	2746	5.5	2677	26	2721.2	11	97.4873	0.280551	2.8e-05	0.0003117	5.4e-06	0.00878	0.00021	1.4673	2.7e-05	-78.9999	1.07116	0.280535	2.80016e-05	-17.1832	1.12842	2746	13.59	321.506
This study (i.e. Vezinet et al., 2019 - Geology)	LA9_01_16	26.151	0.00708373	686000	392	0.0762195	2.01491	0.775741	0.1974	0.531915	13.59	0.662252	0.4963	0.77574	0.5451	2802	17	2597	33	2720.7	13	92.6838	0.280667	4.4e-05	0.000276	1.3e-05	0.00779	0.00026	1.4673	4.2e-05	-74.8979	1.61523	0.280652	4.40057e-05	-11.6843	1.69745	2802	13.13	285.234
This study (i.e. Vezinet et al., 2019 - Geology)	LA9_01_17	10.829	0.00155725	2570000	1562	0.016129	1.90042	0.798176	0.2118	2.19547	15.13	2.77594	0.5262	0.798176	0.63308	2909	69	2725	36	2816	53	93.6748	0.280555	4.6e-05	0.000268	4e-05	0.0084	0.0013	1.46729	5.2e-05	-78.8585	1.68512	0.28054	4.60556e-05	-13.1588	2.36775	2909	20.08	306.523
This study (i.e. Vezinet et al., 2019 - Geology)	LA9_01_18	27.551	0.00168246	363500	201.1	0.106815	1.88147	0.611477	0.1894	0.290391	13.616	0.587544	0.5315	0.611477	0.46274	2735.5	9.2	2747	27	2723.1	11	100.42	0.280725	5e-05	0.000296	1.2e-05	0.00814	0.00024	1.4673	4.5e-05	-72.8469	1.82308	0.280709	5.0004e-05	-11.2062	1.86438	2735.5	10.68	298.319
This study (i.e. Vezinet et al., 2019 - Geology)	LA9_01_19	39.332	0.00213411	594000	309.4	0.11534	1.8474	0.766673	0.1916	0.417537	14.2	1.05634	0.5413	0.766673	0.54899	2754	13	2788	35	2760	19	101.235	0.280568	3e-05	0.00044	3.7e-05	0.01226	0.00085	1.46731	2.9e-05	-78.3988	1.13782	0.280545	3.00638e-05	-16.6332	1.2256	2754	13.1	449.104
This study (i.e. Vezinet et al., 2019 - Geology)	LA9_01_20	29.933	0	445000	248	0.0901713	1.83655	0.56933	0.18808	0.186091	13.856	0.577367	0.5445	0.56933	0.59478	2724.5	6.2	2802	26	2739.8	11	102.845	0.280575	3.2e-05	0.000297	1.3e-05	0.008	0.00045	1.46732	2.8e-05	-78.1512	1.20503	0.28056	3.20073e-05	-16.8014	1.25708	2724.5	15.85	293.403
This study (i.e. Vezinet et al., 2019 - Geology)	LA9_01_21	14.277	0	232000	104	0.273224	1.44425	0.707683	0.3202	0.374766	29.95	0.734558	0.6924	0.707683	0.7455	3570	12	3391	37	3485	14	94.986	0.280332	4.8e-05	0.000444	2e-05	0.01262	0.00075	1.46737	4.3e-05	-86.7443	1.75588	0.280301	4.80201e-05	-5.98206	1.83335	3570	16.35	461.976
This study (i.e. Vezinet et al., 2019 - Geology)	LA9_01_22	20.614	0.0017437	1165000	631	0.0805802	1.71674	0.669528	0.239	0.648536	18.89	0.926416	0.5825	0.669528	0.69468	3111	21	2959	32	3035	19	95.1141	0.28057	4e-05	0.000242	1.1e-05	0.0067	0.00033	1.46731	3.2e-05	-78.3281	1.47778	0.280556	4.00056e-05	-7.83954	1.60468	3111	19	245.487
This study (i.e. Vezinet et al., 2019 - Geology)	LA9_01_23	39.264	0.00184504	742000	414	0.175254	1.8843	0.62182	0.19392	0.185644	13.895	0.611731	0.5307	0.62182	0.8492	2775.6	5.8	2744	28	2742.2	11	98.8615	0.280543	3.8e-05	4.325e-05	6e-07	0.001512	1.6e-05	1.46732	2.9e-05	-79.2828	1.40926	0.280541	3.8e-05	-16.2716	1.45386	2775.6	13.5	54.9976
This study (i.e. Vezinet et al., 2019 - Geology)	LA9_01_24	10.374	0.00286652	460600	196.5	0.322581	1.27388	1.0828	0.3543	0.381033	37.56	1.14483	0.785	1.0828	0.9048	3725	11	3733	61	3707	23	100.215	0.28038	6.4e-05	0.000565	1.6e-05	0.01738	0.00089	1.46725	8.5e-05	-85.0469	2.31552	0.280339	6.40107e-05	-0.919615	2.3767	3725	18.45	634.581
This study (i.e. Vezinet et al., 2019 - Geology)	LA9_01_25	26.664	0.00282483	612000	317	0.122699	1.6	1.12	0.2588	1.27512	23	2.17391	0.625	1.12	0.97627	3230	42	3129	56	3214	46	96.8731	0.280584	6.4e-05	0.000225	1.7e-05	0.00621	0.0004	1.46732	3.4e-05	-77.833	2.31389	0.28057	6.4009e-05	-4.50404	2.55018	3230	13.84	227.558
This study (i.e. Vezinet et al., 2019 - Geology)	LA9_01_26	39.512	0.00515745	230000	143	0.165017	1.94024	0.591773	0.1958	0.561798	14.29	0.73478	0.5154	0.591773	0.30935	2788	18	2680	26	2768.3	14	96.1263	0.280583	4.6e-05	0.000389	1.6e-05	0.01036	0.00046	1.46733	5.8e-05	-77.8683	1.68496	0.280562	4.60082e-05	-15.2148	1.76837	2788	12.62	380.112
This study (i.e. Vezinet et al., 2019 - Geology)	LA9_01_27	4.8463	0.00115107	1960000	1220	0.0363636	1.66667	1.08333	0.232	3.01724	19.8	3.78788	0.6	1.08333	0.66513	3056	99	3029	52	3075	76	99.1165	0.280486	6.4e-05	0.000303	1.2e-05	0.00981	0.00028	1.46723	4.4e-05	-81.2985	2.31467	0.280468	6.40067e-05	-12.2495	3.31008	3056	25.08	357.622
This study (i.e. Vezinet et al., 2019 - Geology)	LA9_01_28	38.081	0.00185991	208000	89.2	0.228833	1.3031	0.651551	0.3698	0.365062	40.17	0.659696	0.7674	0.651551	0.64361	3789	11	3670	37	3774.2	13	96.8593	0.280344	3.4e-05	0.000547	2.4e-05	0.01542	0.00086	1.46725	3.3e-05	-86.32	1.27365	0.280304	3.40462e-05	-0.646482	1.38538	3789	12.75	564.634
This study (i.e. Vezinet et al., 2019 - Geology)	LA9_01_29	20.167	0.00138639	440000	189	0.31348	1.23305	0.801479	0.3768	0.278662	43.3	0.842956	0.811	0.80148	0.91417	3817.9	8.3	3828	47	3848	17	100.265	0.280386	4.2e-05	0.00071	3.9e-05	0.0218	0.0015	1.4673	4e-05	-84.8348	1.54762	0.280334	4.20995e-05	1.10529	1.63516	3817.9	16.51	796.011
This study (i.e. Vezinet et al., 2019 - Geology)	LA9_01_30	22.512	0.000506834	517000	323	0.157406	1.79791	0.611291	0.1933	0.258665	15.2	0.625	0.5562	0.611291	0.71638	2769.2	8.7	2851	28	2827.5	12	102.954	0.280669	3.4e-05	0.0001695	2.3e-06	0.00524	0.00016	1.46727	3.3e-05	-74.8272	1.27231	0.28066	3.40003e-05	-12.1761	1.33109	2769.2	15.22	191.294
This study (i.e. Vezinet et al., 2019 - Geology)	LA9_01_31	39.336	0	643000	318	0.322581	1.48942	0.59577	0.2941	0.49303	27.77	0.738207	0.6714	0.59577	0.51657	3437	15	3311	31	3410	15	96.334	0.280424	4.8e-05	0.0002942	6.7e-06	0.009	0.00022	1.46731	3.1e-05	-83.491	1.75534	0.280405	4.80022e-05	-5.48	1.84053	3437	11.15	328.667
This study (i.e. Vezinet et al., 2019 - Geology)	LA9_01_32	31.949	0.00080061	289000	186	0.119617	1.89609	0.635192	0.18857	0.233335	13.949	0.609363	0.5274	0.635192	0.74368	2728.6	7.7	2730	28	2745.8	12	100.051	0.280491	3.4e-05	0.0003249	6e-06	0.008785	9.1e-05	1.46731	3.9e-05	-81.1217	1.27305	0.280474	3.40016e-05	-19.747	1.32612	2728.6	15.9	322.149
This study (i.e. Vezinet et al., 2019 - Geology)	LA9_01_33	14.722	0.000483781	458000	239	0.83682	1.34048	0.737265	0.358	0.363128	36.09	0.858964	0.746	0.737265	0.83357	3740	11	3592	42	3668	17	96.0428	0.280355	6.6e-05	0.0006896	9.3e-06	0.02098	0.00033	1.46725	4.4e-05	-85.931	2.38608	0.280305	6.6004e-05	-1.77899	2.44552	3740	14.93	766.292
This study (i.e. Vezinet et al., 2019 - Geology)	LA9_01_34	39.437	0.000718267	697000	349	0.439367	1.40944	0.620155	0.3095	0.193861	29.74	0.655683	0.7095	0.620155	0.84617	3517.4	5.9	3456	33	3477.6	13	98.2544	0.280423	3.2e-05	0.0002015	1.8e-06	0.005996	8.5e-05	1.4673	3.3e-05	-83.5264	1.20561	0.280409	3.20003e-05	-3.39056	1.28955	3517.4	10.69	219.159
This study (i.e. Vezinet et al., 2019 - Geology)	LA9_01_35	30.969	8.619e-05	425000	272	0.0862069	1.70532	0.605389	0.1889	0.26469	14.998	0.60008	0.5864	0.605389	0.63644	2731.3	8.7	2975	29	2814.8	11	108.922	0.280697	3.4e-05	0.0001465	3.5e-06	0.004	0.00014	1.46725	3.1e-05	-73.837	1.2722	0.280689	3.40005e-05	-12.0219	1.32976	2731.3	12.59	146.631
This study (i.e. Vezinet et al., 2019 - Geology)	LA9_01_36	19.398	0.000332906	238700	112.1	0.384468	1.22444	0.673442	0.3798	0.315956	42	0.654762	0.8167	0.673442	0.60891	3830.1	9.6	3848	40	3818.6	13	100.467	0.280358	5.8e-05	0.0004916	7.2e-06	0.0141	0.00018	1.46728	4.5e-05	-85.8249	2.10504	0.280322	5.80028e-05	0.971005	2.17144	3830.1	17.22	515.996
This study (i.e. Vezinet et al., 2019 - Geology)	LA9_01_37	11.962	6.87632e-05	347000	199	0.558347	1.41243	0.776836	0.333	0.690691	32.08	1.13778	0.708	0.776836	0.7554	3629	21	3460	36	3552	22	95.3431	0.280355	5.6e-05	0.0006139	4.9e-06	0.01832	0.00029	1.4672	4.7e-05	-85.931	2.03499	0.280312	5.6002e-05	-4.19455	2.14363	3629	16.95	669.551
This study (i.e. Vezinet et al., 2019 - Geology)	LA9_01_38	21.682	0.000643774	1862000	1289	0.017452	1.78285	0.739882	0.1934	0.183557	14.77	0.7109	0.5609	0.739882	0.93582	2770.4	6	2870	34	2800.1	13	103.595	0.280499	5e-05	0.0003102	4.9e-06	0.00846	0.00013	1.46732	3.3e-05	-80.8388	1.82449	0.280483	5.00007e-05	-18.4637	1.85791	2770.4	16.4	310.137
This study (i.e. Vezinet et al., 2019 - Geology)	LA9_01_39	22.957	0.000240863	197400	142.5	1.13766	1.85598	0.844469	0.187	0.641711	13.72	0.838192	0.5388	0.844469	0.85068	2713	21	2777	38	2730	16	102.359	0.280471	3.6e-05	3.68e-05	4.8e-06	0.00108	0.00011	1.46731	5.2e-05	-81.829	1.3412	0.280469	3.60009e-05	-20.2881	1.46421	2713	17.29	39.4929
This study (i.e. Vezinet et al., 2019 - Geology)	LA9_01_40	19.643	0.000697969	213000	160	0.248756	1.87617	1.1257	0.1846	0.704225	13.4	1.3806	0.533	1.1257	0.7132	2692	24	2753	50	2710	29	102.266	0.280748	6.6e-05	0.0001911	7.9e-06	0.005172	9.3e-05	1.46756	0.00012	-72.0335	2.38283	0.280738	6.60013e-05	-11.2067	2.46798	2692	9.2	189.653
This study (i.e. Vezinet et al., 2019 - Geology)	LA9_01_41	19.75	0.00101654	468000	254	0.368053	1.26454	0.632271	0.3675	0.285714	41	0.609756	0.7908	0.632271	0.76377	3780	8.7	3756	36	3795	12	99.3651	0.280395	5.4e-05	0.000745	1.7e-05	0.0223	0.00078	1.46728	5.1e-05	-84.5165	1.96475	0.280341	5.4015e-05	0.443727	2.03218	3780	14.74	814.93
This study (i.e. Vezinet et al., 2019 - Geology)	LA9_01_42	31.595	0.000567225	496000	394	0.125156	1.88076	0.733496	0.186	0.376344	14.07	0.746269	0.5317	0.733496	0.76556	2705	13	2748	33	2753	15	101.59	0.280685	7.4e-05	0.000404	1.3e-05	0.01071	0.0006	1.4675	5.9e-05	-74.2614	2.66495	0.280664	7.40032e-05	-13.5377	2.69942	2705	10.6	393.019
This study (i.e. Vezinet et al., 2019 - Geology)	LA9_01_43	16.659	0.00254058	2293000	1822	0.0841751	1.82448	0.702426	0.1929	0.311042	15.06	0.63081	0.5481	0.702427	0.82144	2766	10	2817	32	2818.8	12	101.844	0.280458	4.8e-05	0.0002591	4.3e-06	0.00963	0.00034	1.46733	6e-05	-82.2887	1.75513	0.280444	4.80006e-05	-19.9286	1.79952	2766	18.9	349.704
This study (i.e. Vezinet et al., 2019 - Geology)	LA9_01_44	16.195	0.000887631	462000	249	0.215054	1.24719	0.623597	0.3689	0.582814	42.2	0.853081	0.8018	0.623597	0.52479	3785	18	3795	36	3823	17	100.264	0.280337	4.4e-05	0.0005388	6.2e-06	0.01572	0.00052	1.46719	4.5e-05	-86.5675	1.61702	0.280298	4.40031e-05	-0.969273	1.73917	3785	15.26	574.953
This study (i.e. Vezinet et al., 2019 - Geology)	LA9_01_45	23.017	0.00119688	326000	181.1	0.413394	1.28783	0.772698	0.3752	0.226546	41.67	0.74394	0.7765	0.772698	0.90476	3811.7	7	3703	43	3811	15	97.1483	0.280385	3.8e-05	0.000714	2.4e-05	0.02119	0.00062	1.46732	2.7e-05	-84.8701	1.41	0.280332	3.80421e-05	0.913225	1.49918	3811.7	14.12	774.581
This study (i.e. Vezinet et al., 2019 - Geology)	LA9_01_46	8.2149	0.00227902	530000	361	0.424088	1.44928	0.724638	0.3377	0.399763	33.62	0.907198	0.69	0.724638	0.6381	3652	12	3382	39	3598	18	92.6068	0.280425	3.2e-05	0.000933	4.2e-05	0.0298	0.0021	1.46731	3.4e-05	-83.4556	1.2056	0.280359	3.2139e-05	-1.96077	1.32427	3652	15.23	1086.8
This study (i.e. Vezinet et al., 2019 - Geology)	LA9_01_47	31.201	0.000178209	1249000	976	0.0393236	1.83486	0.577982	0.19021	0.162978	14.852	0.572313	0.545	0.577982	0.84974	2743	5.3	2804	26	2806.5	9.9	102.224	0.280626	3.8e-05	0.00118	1.4e-05	0.031403	7.6e-05	1.46733	3.1e-05	-76.3478	1.40888	0.280564	3.80083e-05	-16.2076	1.45201	2743	13.86	1152.22
This study (i.e. Vezinet et al., 2019 - Geology)	LA9_01_48	16.81	0	252000	149	0.306279	1.30039	1.04031	0.3724	0.335661	40.78	1.04218	0.769	1.04031	0.88178	3800	10	3675	60	3788	21	96.7105	0.280326	3.8e-05	0.0004836	3.1e-06	0.01429	0.00037	1.46726	5e-05	-86.9565	1.41027	0.28029	3.80011e-05	-0.862406	1.50707	3800	16.13	522.432
Sample LA12-08 (tonalite) - Analyses published in Vezinet et al., 2018 (EPSL)
	2018 March, 6th and 7th
Vezinet et al., 2018 (EPSL)	LA12-08_2-2	15.642	0.00106247	1669000	239	0.399582	1.34445	1.14278	0.3646	0.754251	37.56	1.59744	0.7438	1.14278	0.72014	3768	23	3584	64	3708	30	95.1168	0.280382	6e-05	0.001162	4.6e-05	0.0309	0.0014	1.46732	0.0001	-84.9762	2.15652	0.280297	6.00972e-05	-1.38588	2.29613	3768	16.2	1133.79	0.00201754	0.0123571	6.15381	0.247142	410	4900	30	56	1700	1031
Vezinet et al., 2018 (EPSL)	LA12-08_2-3	18.991	0	1500000	200.2	0.415085	1.30361	1.17325	0.3737	0.668986	39.79	1.38226	0.7671	1.17325	0.89021	3805.9	20	3670	66	3765.1	29	96.4292	0.280412	4.9e-05	0.001117	4.8e-05	0.0296	0.0011	1.46732	5e-05	-83.9153	1.77518	0.28033	4.91307e-05	0.681289	1.91823	3805.9	15.87	1086.23	0.00201654	0.0125132	5.6546	0.250264
Vezinet et al., 2018 (EPSL)	LA12-08_5-1	21.117	0.00116944	2580000	324	0.305556	1.26807	1.20467	0.3483	0.81826	38.19	1.57109	0.7886	1.20467	0.69176	3698	26	3748	68	3724	32	101.352	0.280404	3.8e-05	0.000462	6.7e-05	0.0147	0.0025	1.46733	5.7e-05	-84.1982	1.39804	0.280371	3.83016e-05	-0.437534	1.61793	3698	19.7	536.167	0.0020188	0.00847203	6.78482	0.169441	98.1	< L.O.D.	8.8	89	920	1490
Vezinet et al., 2018 (EPSL)	LA12-08_6-1	12.141	1.34298e-05	1710000	232	0.646552	1.30208	1.43229	0.389	0.822622	41.76	1.55651	0.768	1.43229	0.85868	3866	25	3673	80	3813	32	95.0078	0.280379	6.3e-05	0.00085	0.00016	0.0228	0.0046	1.46735	0.00015	-85.0823	2.26098	0.280315	6.41301e-05	1.614	2.44577	3866	20.6	836.324	0.00201576	0.00938963	5.2665	0.187793
Vezinet et al., 2018 (EPSL)	LA12-08_8-1	16.972	0.00428788	1247000	180.1	0.276513	1.31062	1.37615	0.371	1.28032	39	1.92308	0.763	1.37615	0.33812	3790	44	3653	76	3743	43	96.3852	0.280383	7.5e-05	0.001071	3.1e-05	0.02936	0.00087	1.46724	0.00011	-84.9409	2.68009	0.280304	7.50412e-05	-0.602207	2.94236	3790	13.05	1076.12	0.00201694	0.0128267	5.85599	0.256534
Vezinet et al., 2018 (EPSL)	LA12-08_8-2	26.405	0.00294004	1160000	176	0.2125	1.29366	1.42303	0.368	0.828804	39.21	1.65774	0.773	1.42303	0.46107	3781	26	3687	80	3749	34	97.5139	0.280394	4.2e-05	0.00059	6.8e-05	0.0157	0.0017	1.46746	8.5e-05	-84.5519	1.53449	0.280351	4.2295e-05	0.835961	1.7435	3781	17.8	576.056	0.00201633	0.0127514	5.54889	0.255029	84.2	< L.O.D.	15.8	2.19	163	801
Vezinet et al., 2018 (EPSL)	LA12-08_14-1	7.9554	0.00148363	2980000	446	0.141256	1.16009	1.45012	0.35	1.15714	41.8	1.91388	0.862	1.45012	0.63324	3705	35	4008	86	3812	39	108.178	0.28043	3.8e-05	0.00054	0.00013	0.0181	0.0048	1.46744	9.5e-05	-83.2788	1.39805	0.280391	3.91262e-05	0.456045	1.73658	3705	23	659.158	0.00201786	0.0109824	6.31346	0.219649
Vezinet et al., 2018 (EPSL)	LA12-08_14-2	10.794	0.00296213	1390000	296	0.108446	2.03459	1.32248	0.28	3.03571	18.9	3.43915	0.4915	1.32248	0.33283	3341	98	2577	57	3027	67	77.1326	0.280553	8.9e-05	0.000297	2.5e-05	0.00877	0.00053	1.46768	0.00019	-78.9292	3.17084	0.280534	8.90165e-05	-3.15442	3.97717	3341	20.8	320.632	0.00201816	0.0103061	6.46163	0.206122
Vezinet et al., 2018 (EPSL)	LA12-08_15-1	30.748	0.00104405	1790000	262	0.324809	1.30634	1.24102	0.3758	0.838212	39.55	1.64349	0.7655	1.24102	0.23775	3789	77	3663	71	3744	62	96.6746	0.280442	4.8e-05	0.001409	6.7e-05	0.0388	0.0021	1.46741	5.9e-05	-82.8545	1.74069	0.280339	4.83017e-05	0.59541	2.60083	3789	14.6	1421.89	0.00201622	0.0113054	5.49687	0.226108
Vezinet et al., 2018 (EPSL)	LA12-08_15-2	26.423	0.000541557	1770000	257	0.338521	1.2282	1.16679	0.3868	0.672182	43.54	1.49288	0.8142	1.16679	0.87238	3857.5	20	3839	69	3854.4	29	99.5204	0.280429	3.6e-05	0.000931	6.3e-05	0.0259	0.002	1.46734	5.1e-05	-83.3142	1.33021	0.280359	3.63093e-05	2.98281	1.51432	3857.5	16.2	948.813	0.00201599	0.00782893	5.37926	0.156579	75.2	270	4.9	3.3	97	497
Vezinet et al., 2018 (EPSL)	LA12-08_16-1	39.362	0.00162205	1608000	199	0.749749	1.241	1.17895	0.3855	0.648508	42.97	1.39632	0.8058	1.17895	0.42787	3852.4	20	3809	66	3841.1	29	98.8734	0.280372	3.3e-05	0.001228	3.9e-05	0.03331	0.00099	1.46737	5.5e-05	-85.3298	1.22904	0.28028	3.31341e-05	0.0395915	1.41823	3852.4	14.1	1221.35	0.00201631	0.0107486	5.54025	0.214971
Vezinet et al., 2018 (EPSL)	LA12-08_16-2	26.567	0.000857366	2306000	283	1.03887	1.19218	1.19218	0.3937	0.673101	45.66	1.53307	0.8388	1.19218	0.90681	3884.2	20	3931	66	3901.3	30	101.205	0.280371	3.9e-05	0.001126	2.1e-05	0.03225	0.00057	1.46734	5e-05	-85.3652	1.43205	0.280286	3.90364e-05	1.01479	1.59951	3884.2	15.2	1180.26	0.00201633	0.00903616	5.5508	0.180723	64.9	800	26.2	111	790	910
Vezinet et al., 2018 (EPSL)	LA12-08_17-2	21.807	0.0025938	1760000	387	0.24677	2.17014	1.19358	0.1879	0.691857	11.93	1.46689	0.4608	1.19358	0.77469	2722.5	23	2443	50	2600.6	30	89.7337	0.280712	6.3e-05	0.000651	1.9e-05	0.01645	0.00044	1.46758	0.0001	-73.3066	2.26106	0.280678	6.30087e-05	-12.6298	2.36216	2722.5	10.5	604.735	0.00201821	0.0117093	6.48859	0.234185
Vezinet et al., 2018 (EPSL)	LA12-08_19-1	17.826	0.00273018	3030000	432	0.150463	1.37552	1.58184	0.3075	1.46341	31.2	2.72436	0.727	1.58184	0.96316	3502	46	3518	88	3513	57	100.457	0.280466	2.7e-05	0.000318	1.8e-05	0.00963	0.00076	1.46742	4.1e-05	-82.0058	1.02979	0.280445	2.70291e-05	-2.50365	1.57284	3502	22.3	351.787	0.00201752	0.0110843	6.14611	0.221686
Vezinet et al., 2018 (EPSL)	LA12-08_21-1	21.543	0.00335798	2180000	265	0.837736	1.18582	1.24511	0.3884	0.669413	45.39	1.43203	0.8433	1.24511	0.37565	3864	20	3941	72	3895	29	101.993	0.280408	4.2e-05	0.00138	9.8e-05	0.0386	0.0033	1.4674	6.1e-05	-84.0568	1.5345	0.280305	4.26411e-05	1.18719	1.71181	3864	16.3	1413.79	0.00201799	0.0119593	6.37964	0.239185
Vezinet et al., 2018 (EPSL)	LA12-08_21-2	8.9353	0.0126512	1050000	154	1.2987	1.35501	1.49051	0.3783	1.12345	38.74	1.80692	0.738	1.49051	0.71075	3823	34	3561	83	3738	36	93.1467	0.28058	0.00013	0.000971	1.2e-05	0.0262	0.00037	1.46768	0.0001	-77.9744	4.61331	0.280508	0.000130005	7.45756	4.74973	3823	10.1	960.836	0.00201598	0.012161	5.37646	0.24322
Vezinet et al., 2018 (EPSL)	LA12-08_25-1	25.754	0.00153166	1970000	326	0.0616564	1.39665	1.39665	0.3306	1.04356	32.8	2.13415	0.716	1.39665	0.88973	3616	32	3478	76	3567	41	96.1836	0.280437	3.6e-05	0.00065	3.6e-05	0.0183	0.0015	1.46738	5.2e-05	-83.0313	1.33021	0.280392	3.60906e-05	-1.66579	1.61112	3616	15.3	670.12	0.00201873	0.0126251	6.74779	0.252501	60.4	< L.O.D.	3.2	0.88	21.8	523
Vezinet et al., 2018 (EPSL)	LA12-08_25-2	16.504	0.00401867	3900000	922	0.0206074	1.86706	1.4003	0.2456	0.732899	18.2	1.81319	0.5356	1.4003	0.96391	3156	23	2764	63	2998	35	87.5792	0.280536	3.6e-05	0.0006078	4.2e-06	0.01589	0.00022	1.46739	8e-05	-79.5304	1.33025	0.280499	3.60023e-05	-8.78384	1.49786	3156	20.2	583.404	0.00201751	0.0138912	6.1401	0.277824
Vezinet et al., 2018 (EPSL)	LA12-08_27-1	9.101	0.00365464	2870000	529	0.0926276	1.31752	1.71278	0.3538	0.692482	37.11	1.88628	0.759	1.71278	0.16637	3722.4	21	3639	96	3695	39	97.7595	0.280414	5.2e-05	0.000435	4.7e-05	0.0141	0.0017	1.46738	9.7e-05	-83.8446	1.87887	0.280383	5.21104e-05	0.565479	2.01855	3722.4	27.6	513.995	0.00201866	0.0132364	6.71422	0.264728
Vezinet et al., 2018 (EPSL)	LA12-08_27-2	20.379	0.00105555	5260000	943	0.0234571	1.36612	1.29781	0.3245	0.677966	32.77	1.67836	0.732	1.29781	0.96587	3590.3	21	3539	72	3572	33	98.5712	0.280472	4.4e-05	0.0005914	9.5e-06	0.01616	0.00039	1.46737	6.1e-05	-81.7936	1.60307	0.280431	4.4006e-05	-0.87581	1.75059	3590.3	19.9	592.372	0.00201791	0.0127963	6.33643	0.255926	72.4	< L.O.D.	3.81	2.5	67	572
Vezinet et al., 2018 (EPSL)	LA12-08_28-1	14.034	0.000834091	1238000	207.3	0.643029	1.23916	1.30112	0.386	0.686528	42.97	1.51268	0.807	1.30112	0.91519	3854.5	21	3813	73	3841	30	98.9233	0.280385	5.4e-05	0.001355	5.5e-05	0.038	0.0017	1.46731	9.4e-05	-84.8701	1.94814	0.280284	5.41606e-05	0.213977	2.09093	3854.5	15.46	1391.69	0.00201636	0.0128305	5.56591	0.256609
Vezinet et al., 2018 (EPSL)	LA12-08_30-1	17.159	0	1856000	298	0.775168	1.221	1.28205	0.3881	0.70858	43.83	1.483	0.819	1.28205	0.90976	3862.7	22	3856	76	3861	30	99.8265	0.280396	3.9e-05	0.001428	6.1e-05	0.04	0.0017	1.46733	7e-05	-84.4811	1.43206	0.280289	3.92738e-05	0.600972	1.62095	3862.7	16.2	1465	0.00201851	0.00930985	6.63824	0.186197	94.4	< L.O.D.	6.7	12.9	158	1560
Vezinet et al., 2018 (EPSL)	LA12-08_31-1	15.574	0.00497986	1866000	327.1	0.397432	1.33156	1.26498	0.3432	1.01981	35.61	1.96574	0.751	1.26498	0.88434	3675	32	3611	72	3652	40	98.2585	0.280465	3.1e-05	0.000676	8.8e-05	0.0176	0.0028	1.46741	9e-05	-82.0411	1.16214	0.280417	3.16274e-05	0.652291	1.49021	3675	20.6	646.286	0.00201666	0.00977339	5.71752	0.195468	79.2	153	5.17	7.4	150	645
Vezinet et al., 2018 (EPSL)	LA12-08_31-2	27.538	0.00187016	1300000	221	0.615385	1.35208	1.14927	0.3417	0.834065	34.78	1.58137	0.7396	1.14927	0.37939	3668	25	3568	64	3631	30	97.2737	0.280404	3.7e-05	0.001004	6.9e-05	0.0258	0.002	1.46731	6.2e-05	-84.1982	1.36408	0.280333	3.73265e-05	-2.51662	1.57796	3668	15.8	947.858	0.0020174	0.0102993	6.08286	0.205986	90.4	< L.O.D.	7.2	< L.O.D.	66	1082
Vezinet et al., 2018 (EPSL)	LA12-08_32-1	18.703	0.00711077	1167000	176	0.505682	1.42531	1.42531	0.3377	0.769914	32.79	1.82983	0.7016	1.42531	0.71174	3652	24	3426	77	3573.9	36	93.8116	0.280383	3.1e-05	0.000286	2e-05	0.01083	0.00082	1.46734	9e-05	-84.9409	1.16211	0.280363	3.10325e-05	-1.8305	1.38293	3652	13.1	393.09	0.00201847	0.00917641	6.61773	0.183528
Vezinet et al., 2018 (EPSL)	LA12-08_32-2	16.865	0.00264523	1390000	188.9	0.374801	1.31544	1.38122	0.3469	0.821562	36.48	1.7818	0.7602	1.38122	0.59789	3692	25	3644	78	3679.3	36	98.6999	0.280374	3.4e-05	0.000284	2.8e-05	0.0104	0.0013	1.46727	0.00013	-85.2591	1.26267	0.280354	3.40591e-05	-1.1963	1.4822	3692	14.56	377.814	0.00201851	0.011928	6.63899	0.23856	113.4	302	12.8	15.2	86.7	894
Vezinet et al., 2018 (EPSL)	LA12-08_33-1	15.517	0.00337345	1680000	251	1.11952	1.41243	1.55367	0.383	0.744125	37.16	1.74919	0.708	1.55367	0.93755	3843	23	3447	83	3696	35	89.6956	0.280524	8.7e-05	0.00214	0.00024	0.0597	0.008	1.46736	7e-05	-79.9547	3.10065	0.280365	8.88211e-05	2.82447	3.27563	3843	11.83	2186.82	0.00201676	0.00969949	5.7632	0.19399
Vezinet et al., 2018 (EPSL)	LA12-08_33-2	39.164	0.000411355	1570000	227	0.726872	1.22956	1.16808	0.38866	0.643236	43.44	1.38122	0.8133	1.16808	0.9339	3865	19	3836	66	3852.1	28	99.2497	0.280391	3.3e-05	0.000938	4.4e-05	0.02498	0.0009	1.46735	4.6e-05	-84.658	1.22905	0.280321	3.31672e-05	1.78376	1.41196	3865	14.8	916.527	0.00201636	0.0119606	5.56412	0.239212	97.8	128	3.13	1.84	23.6	780
Vezinet et al., 2018 (EPSL)	LA12-08_35-1	8.763	0.00220192	3970000	797	0.145546	1.50105	1.20084	0.3013	1.07866	27.72	1.76768	0.6662	1.20084	0.53282	3475	34	3291	62	3408	35	94.705	0.280416	4.4e-05	0.000518	3.4e-05	0.0135	0.0011	1.46738	7e-05	-83.7739	1.60305	0.280381	4.40606e-05	-5.40197	1.86036	3475	23.49	495.712	0.00201615	0.0113259	5.46173	0.226517
Vezinet et al., 2018 (EPSL)	LA12-08_35-2	29.627	0.00146949	3840000	876	0.118836	1.86811	1.12087	0.19957	0.676454	14.698	1.42877	0.5353	1.12087	0.61298	2821.7	22	2764	51	2795.7	27	97.9551	0.280687	3.1e-05	0.0004138	9.6e-06	0.01129	0.00021	1.46743	6.1e-05	-74.1906	1.16225	0.280665	3.1005e-05	-10.7786	1.32513	2821.7	18.6	413.876	0.00201814	0.0108513	6.45096	0.217026	60.8	< L.O.D.	2.68	4.6	116	465
Vezinet et al., 2018 (EPSL)	LA12-08_42-1	34.902	0.00059867	1621000	150.4	0.463431	1.29719	1.36204	0.3757	0.718659	40.06	1.74738	0.7709	1.36204	0.89635	3813.6	22	3683	76	3771.7	35	96.5754	0.280424	3.3e-05	0.001261	9.7e-05	0.0345	0.0028	1.46734	5.3e-05	-83.491	1.22907	0.280331	3.37745e-05	0.909173	1.45223	3813.6	14.5	1264.6	0.00201717	0.0108498	5.97051	0.216996	620	5100	8.39	13.5	154	1839
Vezinet et al., 2018 (EPSL)	LA12-08_42-2	22.761	0.000386476	2259000	217.6	0.318015	1.29383	1.35852	0.3811	0.747835	40.8	1.83824	0.7729	1.35852	0.81042	3835.2	23	3691	76	3791.8	34	96.2401	0.280391	3.4e-05	0.001141	3.5e-05	0.02999	0.00072	1.46735	6.9e-05	-84.658	1.26268	0.280306	3.41053e-05	0.549384	1.47196	3835.2	17.6	1100.87	0.00201617	0.00827371	5.46938	0.165474	86.4	< L.O.D.	6.5	4.1	111	954
Vezinet et al., 2018 (EPSL)	LA12-08_44-2	13.869	0	169000	31	0.506452	2.35294	2.11765	0.1826	1.12267	10.67	2.7179	0.425	2.11765	0.75506	2673	37	2283	82	2489	49	85.4097	0.280636	7.4e-05	0.000299	1.9e-05	0.00777	0.00038	1.46759	0.00015	-75.9941	2.64515	0.280621	7.40067e-05	-15.8308	2.81815	2673	8.3	285.34	0.00201874	0.011274	6.75263	0.225479
Vezinet et al., 2018 (EPSL)	LA12-08_46-2	34.792	0.00110501	1214000	109.1	0.346471	1.24378	1.55473	0.3777	0.873709	41.61	1.92261	0.804	1.55473	0.69276	3820	27	3800	90	3807	38	99.4764	0.280408	3.6e-05	0.000963	4.5e-05	0.02587	0.00098	1.46732	4.2e-05	-84.0568	1.3302	0.280337	3.61585e-05	1.27233	1.56962	3820	13.6	948.883	0.00201625	0.0121486	5.51273	0.242973	262	1500	4.68	6	41.7	1369
Vezinet et al., 2018 (EPSL)	LA12-08_48-1	39.23	0.000873852	3150000	336	0.360119	1.26743	1.45754	0.3739	0.735491	40.35	1.85874	0.789	1.45754	0.435	3806.3	22	3746	82	3778	37	98.4158	0.280412	3.2e-05	0.000597	6e-05	0.0191	0.002	1.46734	4e-05	-83.9153	1.19554	0.280368	3.23053e-05	2.05684	1.40873	3806.3	18.4	696.536	0.00201811	0.014333	6.44029	0.286661	102.4	123	9.22	13.1	184	2340
Vezinet et al., 2018 (EPSL)	LA12-08_48-2	33.497	0.000111535	5280000	568	0.227113	1.2536	1.31628	0.3666	1.50027	40.1	2.1197	0.7977	1.31628	0.10961	3762	60	3780	76	3765	54	100.478	0.280432	3.3e-05	0.000711	2.1e-05	0.025	0.001	1.46733	4.3e-05	-83.2081	1.22907	0.28038	3.30472e-05	1.4292	1.95853	3762	19.6	909.207
Vezinet et al., 2018 (EPSL)	LA12-08_48-3	18.042	0.000364073	1320000	164	0.0597561	1.55521	1.55521	0.3213	0.96483	28.32	1.94209	0.643	1.55521	0.67673	3574	30	3201	77	3429	39	89.5635	0.280468	6e-05	0.0001786	2.9e-06	0.00578	0.00016	1.4675	5.4e-05	-81.935	2.15654	0.280456	6.00005e-05	-0.385717	2.33228	3574	12.6	210.711
Vezinet et al., 2018 (EPSL)	LA12-08_49-1	14.986	0.00159826	3280000	415	0.918072	1.32784	1.46063	0.3912	0.779652	40.66	1.84456	0.7531	1.46063	0.86249	3875	24	3618	80	3786	36	93.3677	0.280472	8.1e-05	0.00229	0.00037	0.068	0.011	1.46738	5e-05	-81.7936	2.89023	0.2803	8.56354e-05	1.28847	3.171	3875	15.37	2485.63	0.00201562	0.011028	5.19525	0.22056
Vezinet et al., 2018 (EPSL)	LA12-08_49-2	11.457	0.00119947	2302000	294	0.527211	1.28535	1.54242	0.3892	0.873587	41.72	1.91755	0.778	1.54242	0.038741	3867	26	3709	88	3812	39	95.9141	0.280395	4.6e-05	0.00092	3.8e-05	0.0267	0.0014	1.46729	7.5e-05	-84.5165	1.67178	0.280326	4.60914e-05	2.02134	1.86558	3867	19.8	976.714	0.00201601	0.0121805	5.39066	0.243609
Vezinet et al., 2018 (EPSL)	LA12-08_50-1	28.274	0.000335739	2563000	287	0.445993	1.18455	1.30301	0.3903	0.717397	45.55	1.75631	0.8442	1.30301	0.89871	3871.4	22	3945	78	3899.3	35	101.901	0.280367	4.3e-05	0.000838	3.4e-05	0.0221	0.0013	1.46731	7.2e-05	-85.5067	1.56873	0.280304	4.30779e-05	1.34458	1.74003	3871.4	16.18	811.146	0.0020164	0.013118	5.58459	0.26236	79.9	480	53	50.7	1172	891
Vezinet et al., 2018 (EPSL)	LA12-08_54-1	7.2948	0.000452426	3240000	304	0.473355	1.32979	1.52926	0.3813	0.773669	39.41	1.90307	0.752	1.52926	0.87123	3836	24	3613	83	3756	37	94.1867	0.280428	7.3e-05	0.001554	9.9e-05	0.0422	0.0021	1.46728	6e-05	-83.3495	2.61013	0.280313	7.33747e-05	0.794045	2.7507	3836	16.61	1547.25	0.00201695	0.0105912	5.85903	0.211825	106.7	532	10.92	39.4	834	1110
Vezinet et al., 2018 (EPSL)	LA12-08_54-2	14.586	0.000608543	1990000	194	0.494845	1.29702	1.49157	0.3831	0.835291	40.68	1.84366	0.771	1.49157	0.29345	3843	25	3684	83	3787	37	95.8626	0.280387	5.3e-05	0.000973	3.1e-05	0.0272	0.0013	1.46734	9.1e-05	-84.7994	1.91349	0.280315	5.30534e-05	1.03372	2.07981	3843	17.8	996.269	0.00201515	0.00975799	4.96154	0.19516
Vezinet et al., 2018 (EPSL)	LA12-08_56-1	34.214	0.00162789	1670000	149	0.486577	1.24766	1.37243	0.3795	0.711462	41.81	1.79383	0.8015	1.37243	0.87097	3829	22	3794	77	3814.1	35	99.0859	0.280427	2.7e-05	0.001364	5.6e-05	0.0365	0.0019	1.46731	4.7e-05	-83.3849	1.02977	0.280326	2.73274e-05	1.10018	1.26879	3829	14.2	1338.97	0.00201653	0.0118685	5.64794	0.23737
Vezinet et al., 2018 (EPSL)	LA12-08_56-2	26.115	0.00157253	5250000	510	0.0413725	1.34898	1.34898	0.3189	1.26999	32.55	2.15054	0.7413	1.34898	0.15485	3556	51	3575	75	3563	51	100.534	0.280424	3.1e-05	0.000511	1.1e-05	0.01348	0.00034	1.46733	5.8e-05	-83.491	1.16213	0.280389	3.10139e-05	-3.19596	1.74748	3556	21.6	494.758	0.00201786	0.0090862	6.31454	0.181724	87.3	< L.O.D.	3.48	< L.O.D.	13.9	685
Vezinet et al., 2018 (EPSL)	LA12-08_57-1	13.31	0.00135428	1180000	126	0.389683	1.29702	1.81582	0.3675	1.08844	38.9	2.31362	0.771	1.81582	0.54098	3779	33	3680	100	3739	48	97.3803	0.280475	6e-05	0.000745	2.1e-05	0.02159	0.00057	1.46759	8e-05	-81.6875	2.15655	0.280421	6.00221e-05	3.27404	2.36353	3779	14.5	789.823	0.00201702	0.0104077	5.89443	0.208154
Vezinet et al., 2018 (EPSL)	LA12-08_57-2	13.009	0.000769613	1133000	109.7	0.39289	1.17096	1.52225	0.372	0.846774	43.58	2.06517	0.854	1.52225	0.017005	3798	26	3980	90	3854	40	104.792	0.280384	5.5e-05	0.000666	2.1e-05	0.01857	0.00073	1.46739	8.1e-05	-84.9055	1.98281	0.280335	5.50232e-05	0.681185	2.14913	3798	20.2	680.234	0.0020164	0.0086089	5.58505	0.172178
Vezinet et al., 2018 (EPSL)	LA12-08_57-3	19.45	0.000883097	897000	100	0.346	1.41243	1.48305	0.3472	0.820853	33.83	2.06917	0.708	1.48305	0.92045	3694	25	3449	79	3603	39	93.3676	0.280466	5e-05	0.000659	4.8e-05	0.01673	0.00087	1.46749	0.0001	-82.0058	1.80973	0.280419	5.01188e-05	1.17748	1.97918	3694	17.1	614.919	0.00201596	0.00926198	5.36401	0.18524	72.5	< L.O.D.	2.6	< L.O.D.	12.1	577
Vezinet et al., 2018 (EPSL)	LA12-08_57-4	18.467	0	1286000	124.6	0.325843	1.24533	1.61893	0.3749	0.933582	41.43	2.05165	0.803	1.61893	0.33035	3809	28	3799	92	3803	42	99.7375	0.280385	3e-05	0.000638	1.8e-05	0.01731	0.00057	1.46739	5.6e-05	-84.8701	1.12881	0.280338	3.00322e-05	1.04955	1.4063	3809	19.1	634.687	0.00201587	0.0123998	5.3188	0.247996	83.1	< L.O.D.	3.99	1.08	27.9	670
Vezinet et al., 2018 (EPSL)	LA12-08_58-1	20.146	0.00260171	3170000	319	0.683386	1.21803	1.52253	0.3868	1.16339	43.5	2.06897	0.821	1.52253	0.34752	3854	41	3861	87	3850	46	100.182	0.28053	7.8e-05	0.002	0.0003	0.0592	0.0099	1.46732	6.4e-05	-79.7426	2.78514	0.280381	8.11671e-05	3.65897	3.12131	3854	16.1	2164.19	0.00201662	0.00799554	5.69725	0.159911
Vezinet et al., 2018 (EPSL)	LA12-08_58-2	31.14	0.00162771	1771000	169.5	0.453097	1.2655	1.39205	0.3837	0.76883	41.61	1.80245	0.7902	1.39205	0.38211	3836	49	3753	78	3803	56	97.8363	0.280414	3e-05	0.000861	3.3e-05	0.0241	0.00063	1.46735	5.7e-05	-83.8446	1.12882	0.28035	3.01131e-05	2.13022	1.70974	3836	16.3	882.685	0.00201507	0.0119948	4.92384	0.239897
Vezinet et al., 2018 (EPSL)	LA12-08_60-1	23.259	0.00248808	2065000	197	0.532487	1.22549	1.47059	0.3764	1.04569	41.98	1.90567	0.816	1.47059	0.09769	3812	39	3844	86	3817	41	100.839	0.280425	5.1e-05	0.001258	3.6e-05	0.0354	0.0012	1.46732	6.6e-05	-83.4556	1.84428	0.280332	5.10802e-05	0.915733	2.13931	3812	15.7	1296.32	0.00201597	0.0112257	5.3735	0.224513
Vezinet et al., 2018 (EPSL)	LA12-08_61-1	25.422	0.000546603	2330000	225	0.555556	1.295	1.35975	0.3832	0.704593	40.96	1.83105	0.7722	1.35975	0.93059	3843.7	21	3688	77	3793.9	35	95.9492	0.280401	4.3e-05	0.001629	7.8e-05	0.0444	0.0017	1.4673	4.2e-05	-84.3043	1.56875	0.28028	4.33986e-05	-0.191745	1.74177	3843.7	14.8	1627.7	0.00201688	0.0106394	5.82671	0.212788	89.7	< L.O.D.	6.03	6.92	95.6	853
Vezinet et al., 2018 (EPSL)	LA12-08_61-2	18.778	0.0021099	3153000	278.1	0.413161	1.1562	1.38744	0.3888	0.707305	46.6	1.82403	0.8649	1.38744	0.58779	3865.6	21	4017	84	3922	36	103.917	0.280353	3.9e-05	0.000848	1.1e-05	0.02281	0.00044	1.4673	6.4e-05	-86.0017	1.43204	0.28029	3.90113e-05	0.682281	1.60527	3865.6	18.6	836.607	0.00201597	0.0115065	5.37082	0.23013
Vezinet et al., 2018 (EPSL)	LA12-08_61-3	22.638	0.00191165	2594000	242.9	0.554549	1.21907	1.34097	0.3865	0.750323	43.57	1.83613	0.8203	1.34097	0.4296	3860.2	19	3861	79	3855	36	100.021	0.280432	3.9e-05	0.001004	4.3e-05	0.0272	0.0011	1.46739	9.2e-05	-83.2081	1.43207	0.280357	3.91355e-05	2.95837	1.59449	3860.2	17.1	997.365	0.00201596	0.0123723	5.36822	0.247446
	2017 October, 19th
Vezinet et al., 2018 (EPSL)	LA12_08_1	20.817	0.0105153	17000	50.7	0.226824	1.39121	1.18253	0.3463	0.548657	34.37	1.36747	0.7188	1.18253	0.72478	3689	17	3491	63	3619	27	94.6327	0.280322	3e-05	0.000418	8.9e-05	0.0121	0.0033	1.46712	9.1e-05	-87.098	1.12878	0.280292	3.06644e-05	-3.46291	1.31294	3689	15.38	442.668
Vezinet et al., 2018 (EPSL)	LA12_08_2	22.159	0.0124982	17000	55	0.267273	1.42349	1.13879	0.3298	0.515464	32.17	1.29002	0.7025	1.13879	0.87387	3615	16	3429	60	3555	25	94.8548	0.280333	4.5e-05	0.000581	9.7e-05	0.0163	0.0033	1.46719	0.00012	-86.709	1.63737	0.280292	4.55075e-05	-5.22593	1.76991	3615	13.71	596.955
Vezinet et al., 2018 (EPSL)	LA12_08_3	10.841	0.0101897	36000	298.6	0.328533	1.86776	1.30743	0.18699	0.374352	13.9	1.43885	0.5354	1.30743	0.9196	2714.9	12	2764	57	2742	28	101.809	0.280563	4.4e-05	0.00051	4.8e-05	0.0145	0.0011	1.46724	9.5e-05	-78.5756	1.6031	0.280536	4.4071e-05	-17.8455	1.67312	2714.9	17.4	530.792
Vezinet et al., 2018 (EPSL)	LA12_08_4	12.851	0.0250181	16000	257.6	0.33191	1.85391	1.29774	0.1881	0.425306	14.19	1.37421	0.5394	1.29774	0.92531	2725	14	2780	59	2762	26	102.018	0.280529	6.5e-05	0.000452	1.4e-05	0.01275	0.00019	1.46719	8.2e-05	-79.7779	2.33073	0.280505	6.50043e-05	-18.7144	2.39163	2725	14.65	466.856
Vezinet et al., 2018 (EPSL)	LA12_08_5	8.66	0.00597587	56000	467	0.0424411	1.41643	1.27479	0.3169	0.426002	30.59	1.24224	0.706	1.27479	0.67109	3554	13	3444	68	3506	25	96.9049	0.280415	3e-05	0.000568	6.7e-05	0.0159	0.0015	1.46709	6.1e-05	-83.8093	1.12882	0.280376	3.03509e-05	-3.70332	1.27015	3554	19.48	582.351
Vezinet et al., 2018 (EPSL)	LA12_08_6	12.93	0.0213515	11000	42.1	0.427553	1.19474	1.25448	0.3768	0.504246	43.29	1.386	0.837	1.25448	0.74027	3818	15	3918	75	3848	27	102.619	0.280358	5.5e-05	0.001093	8.3e-05	0.0302	0.0034	1.46729	9.8e-05	-85.8249	1.98281	0.280277	5.5343e-05	-0.900817	2.0991	3818	10.21	1106.6
Vezinet et al., 2018 (EPSL)	LA12_08_7	12.116	0.0208939	7200	41.5	0.363133	1.17786	1.11896	0.3889	0.39856	45.9	1.19826	0.849	1.11896	0.75469	3865.9	12	3962	65	3906.9	24	102.486	0.280429	7.7e-05	0.001072	2.8e-05	0.0285	0.0015	1.46705	8.4e-05	-83.3142	2.7501	0.280349	7.70298e-05	2.8028	2.83223	3865.9	10.7	1045.74
Vezinet et al., 2018 (EPSL)	LA12_08_8	28.336	0.0103628	14000	70.3	0.368421	1.30157	1.10634	0.3825	0.339869	40.5	1.19753	0.7683	1.10634	0.7002	3840.8	10	3674	60	3782.3	24	95.6572	0.280326	4.3e-05	0.000805	1.4e-05	0.02221	0.0008	1.46725	7.7e-05	-86.9565	1.56872	0.280266	4.30137e-05	-0.748405	1.67147	3840.8	11.24	813.869
Vezinet et al., 2018 (EPSL)	LA12_08_9	8.1829	0.0517332	7100	111.2	0.406475	1.21374	1.09237	0.3872	0.477789	43.7	1.373	0.8239	1.09237	0.67152	3859	14	3874	65	3858	27	100.389	0.280382	6.3e-05	0.0008	4e-05	0.0217	0.0008	1.46705	8.6e-05	-84.9762	2.26098	0.280322	6.30718e-05	1.69015	2.35817	3859	14.98	795.657
Vezinet et al., 2018 (EPSL)	LA12_08_10	33.064	0.00221508	97000	506	0.0719368	1.77557	1.2429	0.19664	0.330553	15.24	1.37795	0.5632	1.2429	0.93967	2797.5	11	2878	56	2828	26	102.878	0.280604	3e-05	0.0004478	9.9e-06	0.0127	0.00034	1.46735	4.7e-05	-77.1257	1.12891	0.28058	3.0005e-05	-14.3591	1.21469	2797.5	13.7	464.94
Vezinet et al., 2018 (EPSL)	LA12_08_11	12.893	0.0166857	24000	143.3	0.714585	1.27226	1.33588	0.377	0.809019	40.1	1.62095	0.786	1.33588	0.52908	3818	25	3736	77	3771	32	97.8523	0.28032	0.00011	0.00163	0.00015	0.0494	0.0036	1.467	0.00027	-87.1687	3.90895	0.2802	0.000110561	-3.67196	4.03689	3818	13.43	1804.55
Vezinet et al., 2018 (EPSL)	LA12_08_12	21.943	0.00375341	93000	737	0.105156	1.86637	1.0265	0.18828	0.318674	13.98	1.18026	0.5358	1.0265	0.80775	2726.3	11	2766	47	2747.9	22	101.456	0.280568	3.9e-05	0.000598	1e-05	0.0164	0.00011	1.46741	7.1e-05	-78.3988	1.43212	0.280537	3.9004e-05	-17.5679	1.50162	2726.3	14.65	601.093
Vezinet et al., 2018 (EPSL)	LA12_08_13	16.442	0.00991236	28000	111.7	0.585497	1.26936	1.07895	0.3891	0.359805	42.36	1.18036	0.7878	1.07895	0.65407	3866.7	11	3745	62	3827.2	23	96.8526	0.280315	5.4e-05	0.0007877	9.2e-06	0.02156	0.00053	1.46715	7.9e-05	-87.3455	1.94812	0.280256	5.40053e-05	-0.486695	2.04138	3866.7	10.71	790.272
Vezinet et al., 2018 (EPSL)	LA12_08_14	18.627	0.00607238	40000	262.7	0.472783	1.28932	1.09593	0.3831	0.326286	40.65	1.23001	0.7756	1.09593	0.83162	3843.4	9.9	3701	63	3786	25	96.2949	0.280405	2.4e-05	0.00075	6.5e-06	0.02116	0.00065	1.46727	0.0001	-84.1629	0.932239	0.280349	2.40066e-05	2.27715	1.08248	3843.4	14.6	774.794
Vezinet et al., 2018 (EPSL)	LA12_08_15	22.754	0.00927511	67000	635	0.388976	1.95465	1.07506	0.18828	0.371787	13.152	1.17853	0.5116	1.07506	0.69646	2726.2	12	2663	46	2690.4	22	97.6818	0.280604	4.5e-05	0.000919	1.1e-05	0.02572	0.00071	1.46705	0.00011	-77.1257	1.63746	0.280556	4.50047e-05	-16.8856	1.70465	2726.2	15.7	942.023
Vezinet et al., 2018 (EPSL)	LA12_08_16	29.743	0.00231033	93000	225	0.751111	1.25313	1.25313	0.3593	0.320067	39.1	1.40665	0.798	1.25313	0.948	3746.2	9.9	3778	72	3749	28	100.849	0.280425	3.7e-05	0.000686	4.9e-05	0.0231	0.0026	1.46734	0.0001	-83.4556	1.36409	0.280375	3.71708e-05	0.872876	1.47768	3746.2	14.2	841.134
Vezinet et al., 2018 (EPSL)	LA12_08_17	27.034	0.00376066	84000	671	0.0609538	1.31044	1.04836	0.3267	0.321396	34.27	1.22556	0.7631	1.04836	0.82654	3600.6	10	3655	59	3617	25	101.511	0.28046	3.2e-05	0.00087	4.7e-05	0.0241	0.0013	1.46714	6.5e-05	-82.2179	1.19556	0.2804	3.2168e-05	-1.75242	1.31313	3600.6	14.38	883.003
Vezinet et al., 2018 (EPSL)	LA12_08_18	22.831	0.00296834	160000	676	0.037574	1.46606	1.09955	0.3065	0.424144	28.55	1.331	0.6821	1.09955	0.69826	3502	13	3352	56	3441	24	95.7167	0.28042	4.1e-05	0.000746	2.4e-05	0.02091	0.00058	1.46729	6.8e-05	-83.6324	1.5003	0.28037	4.10331e-05	-5.17441	1.60491	3502	15.73	765.811
Vezinet et al., 2018 (EPSL)	LA12_08_19	29.294	0.00982606	34000	140	1.19286	1.31735	1.11975	0.3723	0.496911	38.64	1.28106	0.7591	1.11975	0.26117	3799	15	3646	60	3735	26	95.9726	0.280387	6.2e-05	0.00143	0.00011	0.0417	0.0037	1.46718	7.7e-05	-84.7994	2.22614	0.280282	6.25282e-05	-1.19158	2.34119	3799	10.68	1525.19
Vezinet et al., 2018 (EPSL)	LA12_08_20	15.504	0.0417549	7400	68.9	0.815675	1.18624	1.24555	0.3903	0.550858	44.3	1.24153	0.843	1.24555	0.51762	3871	16	3940	73	3871.6	24	101.782	0.280248	6.2e-05	0.0004744	7.7e-06	0.01357	0.00085	1.46711	8.2e-05	-89.7148	2.22611	0.280212	6.20031e-05	-1.93844	2.3296	3871	12.95	496.646
Vezinet et al., 2018 (EPSL)	LA12_08_21	10.835	0.00732221	26000	231	1.41126	1.26263	1.26263	0.3834	0.443401	41.72	1.31831	0.792	1.26263	0.87495	3844	13	3758	72	3812	26	97.7627	0.280461	7.5e-05	0.002409	6e-05	0.0726	0.0024	1.4673	9e-05	-82.1826	2.6801	0.280282	7.51396e-05	-0.11482	2.76874	3844	11.03	2652.51
Vezinet et al., 2018 (EPSL)	LA12_08_22	13.271	0.00309171	86000	1210	0.16281	1.40647	1.89873	0.3441	0.88637	32.9	1.82371	0.711	1.89873	0.95907	3679	27	3458	100	3575	37	93.9929	0.28041	0.00011	0.00098	0.00021	0.029	0.0067	1.4672	0.00015	-83.9861	3.90896	0.28034	0.00011101	-1.98616	4.05627	3679	17.1	1060.17
Vezinet et al., 2018 (EPSL)	LA12_08_23	16.407	0.00747859	27000	789	0.34474	1.23138	1.10824	0.3884	0.42482	43.19	1.27344	0.8121	1.10824	0.44297	3864	13	3832	64	3846	25	99.1718	0.280369	4.2e-05	0.000845	2.5e-05	0.02412	0.00039	1.46706	8.1e-05	-85.4359	1.53448	0.280306	4.20431e-05	1.22364	1.65291	3864	14.5	882.826
Vezinet et al., 2018 (EPSL)	LA12_08_24	33.91	0.00731426	34000	405	0.469136	1.1534	1.21107	0.3825	0.339869	45.42	1.321	0.867	1.21107	0.94355	3840.8	10	4021	73	3895	26	104.692	0.280368	4.7e-05	0.000698	1.9e-05	0.01888	0.00062	1.46711	8.1e-05	-85.4713	1.7062	0.280316	4.7022e-05	1.03386	1.8037	3840.8	9.16	692.328
Vezinet et al., 2018 (EPSL)	LA12_08_25	30.819	0.00581612	29000	282	0.507092	1.19632	1.1365	0.3879	0.399588	44.5	1.23596	0.8359	1.1365	0.50358	3861.5	12	3915	68	3875.6	24	101.385	0.280413	5e-05	0.00121	0.0002	0.0355	0.007	1.46717	5.7e-05	-83.88	1.80971	0.280323	5.21899e-05	1.76135	1.98357	3861.5	11.32	1298.16
Vezinet et al., 2018 (EPSL)	LA12_08_26	21.491	0.00374555	75000	2121	0.033239	1.37665	1.10132	0.3089	0.453221	30.48	1.27953	0.7264	1.10132	0.5385	3514	14	3519	61	3502	26	100.142	0.280427	3.2e-05	0.000509	5.2e-05	0.01407	0.00097	1.46719	6.6e-05	-83.3849	1.19554	0.280392	3.21943e-05	-4.07195	1.33048	3514	18.5	515.551
Vezinet et al., 2018 (EPSL)	LA12_08_27	8.684	0.0113745	28000	414	0.514493	1.37552	1.78817	0.3689	1.30117	35.43	1.55236	0.727	1.78817	0.63593	3784	39	3520	98	3650	31	93.0233	0.2803	0.00028	0.001673	3.5e-05	0.0513	0.0034	1.46718	0.00054	-87.8759	9.90902	0.280178	0.000280015	-5.27458	10.0513	3784	12.02	1873.26
Vezinet et al., 2018 (EPSL)	LA12_08_28	21.498	0.0174639	10000	371.5	0.451952	1.2692	1.07882	0.3808	0.354517	40.9	1.22249	0.7879	1.07882	0.7978	3834.1	11	3745	61	3792.3	24	97.6761	0.280397	4.7e-05	0.001292	5.6e-05	0.03663	0.00067	1.46709	7.5e-05	-84.4458	1.70621	0.280301	4.71861e-05	0.338126	1.81222	3834.1	14	1341.02
Vezinet et al., 2018 (EPSL)	LA12_08_29	7.8438	0.0142568	87000	365	0.684932	1.27226	1.39949	0.33	1.51515	33.7	1.37982	0.786	1.39949	0.94249	3612	45	3737	80	3601	27	103.461	0.28033	0.0003	0.00158	0.00019	0.0504	0.0083	1.46689	0.00048	-86.8151	10.6158	0.28022	0.000300296	-7.88851	10.7783	3612	17.5	1838.15
Vezinet et al., 2018 (EPSL)	LA12_08_30	39.295	0.0266845	6100	80.9	0.850433	1.25644	1.06797	0.3874	0.387197	42.12	1.17521	0.7959	1.06797	0.57343	3859.8	11	3774	62	3821.4	24	97.7771	0.280376	4.6e-05	0.001139	5.3e-05	0.0315	0.001	1.46714	7.1e-05	-85.1884	1.67177	0.280291	4.61724e-05	0.591074	1.77971	3859.8	8.46	1154.2
Vezinet et al., 2018 (EPSL)	LA12_08_31	13.896	0.00351656	110000	1420	0.0305634	1.40746	1.05559	0.3087	0.356333	30.08	1.16356	0.7105	1.05559	0.615	3513.6	11	3460	58	3489.3	23	98.4745	0.280461	6.2e-05	0.000834	3.5e-05	0.0234	0.0012	1.46707	7.9e-05	-82.1826	2.22616	0.280404	6.20462e-05	-3.65478	2.30278	3513.6	16	856.976
Vezinet et al., 2018 (EPSL)	LA12_08_32	16.23	0.027337	8100	237.7	0.576357	1.18203	1.18203	0.3869	0.374774	44.75	1.34078	0.846	1.18203	0.91116	3857.9	11	3952	70	3881	27	102.439	0.280339	4.7e-05	0.000773	5.2e-05	0.0215	0.002	1.46703	8.1e-05	-86.4968	1.70619	0.280281	4.71612e-05	0.20206	1.81233	3857.9	14.97	787.63
Vezinet et al., 2018 (EPSL)	LA12_08_33	22.912	0.00571327	45000	470	0.0997872	1.78795	1.07277	0.19435	0.308721	14.93	1.20563	0.5593	1.07277	0.80586	2778.4	10	2863	50	2810.5	23	103.045	0.280673	3.9e-05	0.000524	1e-05	0.014579	8.6e-05	1.4674	4.5e-05	-74.6857	1.43216	0.280645	3.9004e-05	-12.4905	1.49957	2778.4	14.62	534.081
Vezinet et al., 2018 (EPSL)	LA12_08_34	9.2871	0.0303226	19000	160.5	0.366355	1.44092	1.58501	0.3575	1.21678	33.1	2.1148	0.694	1.58501	0.89174	3736	37	3395	85	3582	41	90.8726	0.280309	9.6e-05	0.0005487	7.1e-06	0.01616	0.00089	1.46704	0.0002	-87.5577	3.41663	0.280269	9.60024e-05	-3.15067	3.58899	3736	13.21	590.862
Vezinet et al., 2018 (EPSL)	LA12_08_35	15.977	0.00733266	69000	1114	0.0850987	2.0004	1.20024	0.188	0.398936	12.7	1.1811	0.4999	1.20024	0.72761	2723.5	13	2613	51	2657.7	23	95.9427	0.280596	4.5e-05	0.0007748	1.1e-06	0.02177	0.00093	1.46733	8.3e-05	-77.4086	1.63746	0.280556	4.50008e-05	-16.9642	1.70846	2723.5	16.1	797.242
Vezinet et al., 2018 (EPSL)	LA12_08_36	34.612	0.0126166	12000	97.1	0.77137	1.21212	1.09091	0.3854	0.337312	43.57	1.14758	0.825	1.09091	0.84678	3852	10	3877	64	3854.8	23	100.649	0.28037	4.4e-05	0.00118	4.3e-05	0.0323	0.0017	1.46721	6.2e-05	-85.4006	1.60304	0.280282	4.4119e-05	0.0866654	1.70823	3852	9.43	1183.94
Vezinet et al., 2018 (EPSL)	LA12_08_37	31.725	0.00955412	33000	615	0.0721951	1.70853	1.02511	0.18891	0.344079	15.194	1.15177	0.5853	1.02512	0.80933	2731.7	11	2970	51	2827.2	22	108.724	0.280647	4e-05	0.000511	1.3e-05	0.0137	0.00026	1.46729	4.9e-05	-75.6051	1.46624	0.28062	4.00061e-05	-14.4704	1.53487	2731.7	14.4	502.537
Vezinet et al., 2018 (EPSL)	LA12_08_38	14.358	0.00753445	120000	1340	0.0411194	1.4041	1.19348	0.2765	0.578662	26.91	1.22631	0.7122	1.19348	0.94376	3342	18	3466	64	3383.2	19	103.71	0.280588	4e-05	0.000482	1.2e-05	0.01356	0.00063	1.46713	6.3e-05	-77.6915	1.46621	0.280557	4.00081e-05	-2.30806	1.59317	3342	19.6	496.561
Vezinet et al., 2018 (EPSL)	LA12_08_39	18.757	0.00586784	120000	865	0.720231	1.23487	1.11139	0.385	0.454545	42.71	1.40482	0.8098	1.11139	0.57947	3850	14	3824	65	3834	29	99.3247	0.2805	0.00011	0.00297	0.00031	0.0881	0.0099	1.46731	0.0001	-80.8034	3.90897	0.280279	0.000112407	-0.0810984	4.07183	3850	11.52	3220.47
Vezinet et al., 2018 (EPSL)	LA12_08_40	39.24	0.00320326	94000	506	0.735178	1.23916	1.36307	0.3874	0.361384	42.68	1.40581	0.807	1.36307	0.85997	3859.7	11	3809	78	3832	28	98.6864	0.280466	5.4e-05	0.00152	0.0001	0.0447	0.0041	1.46701	3.8e-05	-82.0058	1.94816	0.280352	5.45179e-05	2.78415	2.05847	3859.7	11.8	1634.46
Vezinet et al., 2018 (EPSL)	LA12_08_41	39.285	0.00961374	77000	1000	0.0563	1.8315	1.28205	0.19586	0.33187	14.57	1.50995	0.546	1.28205	0.96387	2791	11	2806	60	2787	28	100.537	0.280627	2.6e-05	0.000383	4.6e-06	0.01022	0.00013	1.46726	4.9e-05	-76.3124	0.997174	0.280607	2.60015e-05	-13.5678	1.09129	2791	14.5	374.949
Vezinet et al., 2018 (EPSL)	LA12_08_42	16.401	0.00232407	110000	470	0.248936	1.68634	2.10793	0.3567	1.02327	27.73	1.51461	0.593	2.10793	0.86695	3732	31	2995	100	3408	29	80.2519	0.28053	0.0001	0.00247	0.00037	0.0637	0.007	1.46714	0.00011	-79.7426	3.55725	0.280352	0.000103517	-0.307509	3.8149	3732	11.9	2339.94
Vezinet et al., 2018 (EPSL)	LA12_08_43	22.622	0.0130986	21000	268	0.852612	1.37608	1.10087	0.3603	0.402442	35.67	1.17746	0.7267	1.10087	0.4824	3749.9	12	3521	59	3657.1	23	93.8958	0.280483	5.8e-05	0.001402	2.4e-05	0.03978	0.00077	1.46723	9.6e-05	-81.4046	2.087	0.280381	5.80288e-05	1.17659	2.17647	3749.9	13.5	1456.3
Vezinet et al., 2018 (EPSL)	LA12_08_44	31.307	0.00760351	51000	340	0.735294	1.45773	1.09329	0.3559	0.351222	33.38	1.25824	0.686	1.09329	0.72666	3731.3	11	3366	58	3591	26	90.2098	0.280518	4.9e-05	0.000751	4.5e-05	0.0193	0.0015	1.46709	8.4e-05	-80.1669	1.77521	0.280464	4.91083e-05	3.67254	1.87226	3731.3	10.1	709.055
Vezinet et al., 2018 (EPSL)	LA12_08_45	12.858	0.06453	22000	145.7	1.21482	1.21359	1.21359	0.3833	0.430472	43.11	1.39179	0.824	1.21359	0.83248	3844	13	3873	71	3844	29	100.754	0.280449	8.6e-05	0.00135	0.00011	0.0388	0.0031	1.46732	7.1e-05	-82.6069	3.06555	0.280349	8.63905e-05	2.26831	3.15903	3844	13.5	1419.81
Vezinet et al., 2018 (EPSL)	LA12_08_46	16.891	0.01741	46000	234.7	0.258202	1.22956	1.1066	0.3682	0.339489	40.62	1.18168	0.8133	1.1066	0.70511	3783.3	10	3836	62	3785.7	24	101.393	0.280427	4e-05	0.000471	1.3e-05	0.01238	0.00069	1.46706	0.00011	-83.3849	1.46616	0.280393	4.00117e-05	2.37812	1.57126	3783.3	12.9	454.444
Vezinet et al., 2018 (EPSL)	LA12_08_47	25.831	0.0127078	23000	117.3	0.728048	1.37741	1.23967	0.3711	0.552412	36.79	1.49497	0.726	1.23967	0.89544	3794	17	3516	68	3686	28	92.6726	0.280397	4.3e-05	0.000578	1.4e-05	0.01476	0.00085	1.46723	0.00011	-84.4458	1.56874	0.280355	4.30131e-05	1.28119	1.7019	3794	15.5	542.391
Vezinet et al., 2018 (EPSL)	LA12_08_48	39.214	0.0022464	210000	461	0.130152	1.30378	2.15124	0.2976	0.873656	31.6	3.00633	0.767	2.15124	0.99509	3452	27	3650	120	3506	61	105.736	0.280384	2.8e-05	0.00046	4.6e-05	0.0131	0.0017	1.46715	4.8e-05	-84.9055	1.06262	0.280353	2.81684e-05	-6.94486	1.32521	3452	13.3	479.516
Vezinet et al., 2018 (EPSL)	LA12_08_49	18.626	0.00136777	290000	783	0.191571	1.34264	1.07411	0.3108	0.337838	31.98	1.15697	0.7448	1.07411	0.80701	3523.8	10	3588	58	3549.5	23	101.822	0.280437	5.9e-05	0.0007736	2.8e-06	0.02199	0.00035	1.46711	5.7e-05	-83.0313	2.12175	0.280384	5.9001e-05	-4.1265	2.1963	3523.8	15.6	804.979
Vezinet et al., 2018 (EPSL)	LA12_08_50	8.0949	0.0277086	25000	166.6	1.0084	1.14286	1.37143	0.3606	0.665557	43.46	1.38058	0.875	1.37143	0.74809	3751	21	4050	83	3852	27	107.971	0.280447	5.1e-05	0.001524	5.5e-05	0.0434	0.002	1.46719	9.2e-05	-82.6777	1.84429	0.280336	5.11622e-05	-0.397908	1.9885	3751	13.44	1588.63
Vezinet et al., 2018 (EPSL)	LA12_08_51	23.7	0.00777096	36000	164.7	1.27505	1.26904	1.01523	0.3863	0.310639	41.75	1.17365	0.788	1.01523	0.58979	3855.6	9.2	3746	60	3812.9	23	97.1574	0.280345	5.6e-05	0.00121	5.7e-05	0.0341	0.0012	1.46729	0.0001	-86.2846	2.0175	0.280255	5.61632e-05	-0.801654	2.10883	3855.6	11.49	1248.65
Vezinet et al., 2018 (EPSL)	LA12_08_52	9.2451	0.00656592	60000	110	0.981818	1.3089	1.37434	0.3725	0.496644	37.99	1.30297	0.764	1.37435	0.84759	3801	15	3657	76	3719	25	96.2115	0.28023	0.00019	0.00104	0.00013	0.0317	0.0024	1.46694	0.0004	-90.3513	6.72993	0.280154	0.000190241	-5.72323	6.82383	3801	14.87	1157.77
Vezinet et al., 2018 (EPSL)	LA12_08_53	14.855	0.00277159	84000	301	0.916944	1.24363	1.05708	0.3735	0.334672	41.68	1.13964	0.8041	1.05708	0.80089	3805	10	3804	60	3811.4	23	99.9737	0.280404	3.6e-05	0.001153	1.8e-05	0.03212	0.00081	1.46722	3.3e-05	-84.1982	1.3302	0.280319	3.60271e-05	0.280431	1.44432	3805	14.2	1176.62
Vezinet et al., 2018 (EPSL)	LA12_08_54	14.878	0.00587697	170000	379	0.192612	2.1777	1.30662	0.1842	0.542888	11.13	1.48248	0.4592	1.30662	0.89128	2689	18	2435	51	2533	28	90.5541	0.280678	5.3e-05	0.000425	2.7e-05	0.01126	0.00067	1.46716	0.00011	-74.5089	1.91357	0.280656	5.30185e-05	-14.1958	1.9989	2689	9.87	413.211
Vezinet et al., 2018 (EPSL)	LA12_08_55	9.1051	0.00669284	86000	347	1.12968	1.23001	1.29151	0.3854	0.376232	42.21	1.30301	0.813	1.29151	0.78536	3852.4	11	3833	74	3829	33	99.4964	0.280616	9.2e-05	0.001899	9.9e-05	0.0552	0.003	1.46724	0.00016	-76.7014	3.27617	0.280474	9.22988e-05	6.95986	3.36119	3852.4	12.4	2019.17
Vezinet et al., 2018 (EPSL)	LA12_08_56	12.231	0.0136862	34000	186	0.698925	1.17385	1.11515	0.3858	0.557284	44.3	1.12867	0.8519	1.11515	0.78468	3853	17	3972	65	3871.8	23	103.089	0.28037	0.00015	0.00115	8.3e-05	0.0352	0.0051	1.46699	0.00022	-85.4006	5.31839	0.280284	0.000150129	0.189706	5.40747	3853	12.98	1285.43
Vezinet et al., 2018 (EPSL)	LA12_08_57	17.741	0.00328277	91000	588	0.646259	1.17357	1.05621	0.3877	0.322414	45.84	1.19983	0.8521	1.05621	0.76386	3861.1	9.8	3973	63	3905.7	23	102.898	0.280393	5.4e-05	0.001168	9.5e-05	0.0329	0.0034	1.4674	8.2e-05	-84.5872	1.94814	0.280306	5.44668e-05	1.15049	2.05325	3861.1	12.03	1204.73
Vezinet et al., 2018 (EPSL)	LA12_08_58	19.479	0.0111947	94000	3650	0.0469589	2.66241	1.23802	0.1595	1.03448	8.16	1.59314	0.3756	1.23802	0.7676	2446	35	2055	44	2252	26	84.0147	0.2806	4.1e-05	0.000732	4.5e-05	0.0221	0.0014	1.46712	6e-05	-77.2672	1.50036	0.280566	4.10572e-05	-23.0863	1.74234	2446	19.9	807.398
Vezinet et al., 2018 (EPSL)	LA12_08_59	11.861	0.0343723	9700	282.8	0.414427	1.23305	1.418	0.3721	0.631551	41.51	1.32498	0.811	1.418	0.67687	3799	19	3828	82	3807	27	100.763	0.280404	7.3e-05	0.0006488	9e-06	0.01794	0.00069	1.46735	9.5e-05	-84.1982	2.61012	0.280356	7.30037e-05	1.46332	2.71419	3799	13.97	657.347
Vezinet et al., 2018 (EPSL)	LA12_08_60	19.259	0.00429348	32000	328	0.306707	1.27714	1.341	0.36	0.597222	38.59	1.55481	0.783	1.341	0.57013	3748	18	3727	77	3733	31	99.4397	0.280434	4.9e-05	0.000797	1.8e-05	0.02112	0.00035	1.46702	0.0001	-83.1374	1.77518	0.280376	4.90189e-05	0.949242	1.90086	3748	14.49	775.041
Vezinet et al., 2018 (EPSL)	LA12_08_61	13.419	0.0160024	13000	319	0.474295	1.20048	1.20048	0.388	0.412371	44.83	1.33839	0.833	1.20048	0.91329	3862.2	12	3907	70	3883	26	101.16	0.280444	5.7e-05	0.0014764	6.9e-06	0.04032	0.0007	1.46719	8.3e-05	-82.7837	2.05225	0.280334	5.70056e-05	2.17295	2.14572	3862.2	13.57	1478.03
Vezinet et al., 2018 (EPSL)	LA12_08_62	26.255	0.0029085	200000	2730	0.0344322	1.66806	1.08424	0.2692	0.445765	22.3	1.21076	0.5995	1.08424	0.89194	3300	14	3027	54	3196.2	24	91.7273	0.280489	2.9e-05	0.001029	5.5e-05	0.0281	0.0012	1.46716	6.5e-05	-81.1924	1.09569	0.280424	2.92127e-05	-8.05846	1.2294	3300	14.1	1030.08
Vezinet et al., 2018 (EPSL)	LA12_08_63	25.072	0.00707102	39000	290	0.658621	1.24719	1.12247	0.3779	0.555703	42.09	1.17605	0.8018	1.12247	0.45656	3821	17	3794	65	3820.8	23	99.2934	0.280337	3.9e-05	0.00088	5.5e-05	0.0247	0.002	1.46711	6.7e-05	-86.5675	1.43204	0.280272	3.92137e-05	-1.01836	1.58192	3821	11.56	904.574
Vezinet et al., 2018 (EPSL)	LA12_08_64	7.3038	0.0356757	9000	426.9	0.339658	1.45773	1.6035	0.3266	1.07165	30.4	1.97368	0.686	1.6035	0.85437	3599	32	3365	84	3499	40	93.4982	0.280484	5.2e-05	0.000585	2.4e-05	0.0163	0.0013	1.467	0.00011	-81.3692	1.87889	0.280443	5.20284e-05	-0.227636	2.09261	3599	20.82	597.097
Vezinet et al., 2018 (EPSL)	LA12_08_65	14.487	0.00297524	48000	211	1.49763	1.1274	1.2965	0.3804	0.55205	46.52	1.39725	0.887	1.29651	0.87532	3832	17	4092	78	3919	31	106.785	0.2804	8.2e-05	0.00172	0.00014	0.0517	0.0052	1.46722	9.1e-05	-84.3397	2.92527	0.280272	8.26588e-05	-0.735866	3.04031	3832	11.83	1889.07
Vezinet et al., 2018 (EPSL)	LA12_08_66	22.773	0.00655807	19000	216	0.206481	1.2204	1.09836	0.3698	0.338021	42.34	1.18092	0.8194	1.09836	0.80659	3789.8	10	3858	63	3826.7	24	101.8	0.280429	3.7e-05	0.000718	1.2e-05	0.01878	0.00021	1.46711	6e-05	-83.3142	1.36409	0.280376	3.70115e-05	1.9574	1.47501	3789.8	14.36	689.499
Vezinet et al., 2018 (EPSL)	LA12_08_67	20.335	0.0201173	120000	2320	0.381466	2.34192	1.63934	0.1749	0.600343	10.29	1.6035	0.427	1.63934	0.94367	2603	20	2288	61	2459	30	87.8986	0.280686	3.6e-05	0.000763	2.5e-05	0.02317	0.00054	1.46706	8.4e-05	-74.226	1.33031	0.280648	3.60231e-05	-16.4979	1.45357	2603	20.2	846.332
Vezinet et al., 2018 (EPSL)	LA12_08_68	17.578	0.015379	25000	750	0.0732	1.33014	1.13062	0.3162	0.332068	33.25	1.21805	0.7518	1.13062	0.85564	3550.8	10	3614	62	3588	24	101.78	0.280382	3.3e-05	0.000647	7.3e-05	0.017	0.0017	1.46709	6.5e-05	-84.9762	1.22905	0.280338	3.3378e-05	-5.14807	1.34855	3550.8	14.94	624.043
Vezinet et al., 2018 (EPSL)	LA12_08_69	16.836	0.00145219	160000	394	1.08122	1.21065	1.33172	0.3814	0.681699	43.26	1.61812	0.826	1.33172	-0.12736	3836	21	3880	78	3846	31	101.147	0.280435	9.7e-05	0.00147	0.00017	0.0448	0.007	1.46704	0.00013	-83.102	3.45179	0.280326	9.78209e-05	1.26629	3.57986	3836	13	1636.23
Vezinet et al., 2018 (EPSL)	LA12_08_70	21.03	0.00854716	18000	351	0.507123	1.20482	1.20482	0.3866	0.362131	44.9	1.22494	0.83	1.20482	0.84003	3857	11	3895	69	3884	25	100.985	0.280384	4e-05	0.00107	0.00016	0.0295	0.0047	1.46728	7.5e-05	-84.9055	1.46614	0.280304	4.17481e-05	0.995253	1.63458	3857	13.9	1081.03
	2017 October, 20th (annealed zircon grains)
Vezinet et al., 2018 (EPSL)	LA12_08_anne_1	22.423	0.00270813	770000	397	0.251889	1.33726	1.00294	0.3437	0.42188	35.75	1.07692	0.7478	1.00294	0.63462	3678	13	3599	57	3659	21	97.8521	0.280413	3.8e-05	0.000293	4.3e-05	0.0077	0.0013	1.46729	6.1e-05	-83.88	1.39804	0.280392	3.81229e-05	-0.160872	1.51866	3678	11.55	282.653
Vezinet et al., 2018 (EPSL)	LA12_08_anne_2	15.998	2.78581e-05	2091000	1182	0.0652284	1.39412	1.04559	0.3222	0.155183	32.17	0.963631	0.7173	1.04559	0.83795	3579.6	4.8	3486	55	3555.3	19	97.3852	0.280428	5.8e-05	0.0007626	9e-06	0.02003	0.0004	1.46732	0.00011	-83.3495	2.08699	0.280375	5.80039e-05	-3.1179	2.1539	3579.6	10.42	735.279
Vezinet et al., 2018 (EPSL)	LA12_08_anne_3	39.246	0.000591008	2160000	1600	0.470625	1.94401	0.972006	0.1874	0.136073	13.36	1.01048	0.5144	0.972006	0.8776	2718.6	4.5	2675	44	2705	19	98.3962	0.280583	3.9e-05	0.0004458	5.2e-06	0.01107	0.00031	1.46734	6.3e-05	-77.8683	1.43213	0.28056	3.90011e-05	-16.9295	1.48273	2718.6	8.18	407.228
Vezinet et al., 2018 (EPSL)	LA12_08_anne_4	12.784	0.000959738	713000	362	0.566298	1.26151	1.07228	0.3869	0.245541	42.66	0.996249	0.7927	1.07228	0.89497	3858.2	7.4	3763	60	3834.5	20	97.5325	0.280381	8.2e-05	0.001205	2e-05	0.030218	7.2e-05	1.46729	0.0001	-85.0116	2.92527	0.280291	8.20148e-05	0.556403	2.99628	3858.2	8.1	1111.2
Vezinet et al., 2018 (EPSL)	LA12_08_anne_5	39.227	0.000486979	427000	205	0.663415	1.23487	1.04964	0.3848	0.2079	43.13	1.00858	0.8098	1.04964	0.76466	3849.9	6.4	3824	60	3846.1	19	99.3273	0.280382	5.1e-05	0.000851	2.5e-05	0.0221	0.0011	1.46729	7e-05	-84.9762	1.84427	0.280319	5.10349e-05	1.34085	1.9291	3849.9	8.01	811.606
Vezinet et al., 2018 (EPSL)	LA12_08_anne_6	16.242	0.00642235	530000	277	0.781949	1.2547	1.00376	0.3914	0.370465	43.32	1.00416	0.797	1.00376	0.40014	3875	11	3778	58	3849.6	20	97.4968	0.280414	7.9e-05	0.0011	0.00011	0.0303	0.0035	1.4674	8.4e-05	-83.8446	2.82015	0.280331	7.94311e-05	2.40466	2.91342	3875	8.15	1110.38
Vezinet et al., 2018 (EPSL)	LA12_08_anne_7	21.781	0.000149494	4250000	2440	0.0283607	1.40174	1.0513	0.3159	0.269072	31.2	1.02564	0.7134	1.0513	0.76354	3549.1	8.2	3471	55	3525	20	97.7994	0.280434	4.5e-05	0.0005313	1.6e-06	0.01408	0.00045	1.46731	6.1e-05	-83.1374	1.6374	0.280398	4.50005e-05	-3.05136	1.71982	3549.1	13.01	516.693
Vezinet et al., 2018 (EPSL)	LA12_08_anne_8	39.208	0.00224246	2558000	1319	0.0499621	1.36556	1.02417	0.32699	0.110095	32.99	0.939679	0.7323	1.02417	0.83555	3602.2	3.4	3542	54	3580.1	19	98.3288	0.28042	3.7e-05	0.000519	2.6e-05	0.01441	0.00062	1.46739	5.6e-05	-83.6324	1.36409	0.280384	3.70445e-05	-2.27077	1.45017	3602.2	9.5	527.928
Vezinet et al., 2018 (EPSL)	LA12_08_anne_9	39.309	0.00102638	2980000	1660	0.0668675	1.32732	1.19458	0.3217	0.326391	33.31	1.2909	0.7534	1.19458	0.9859	3577	10	3618	66	3586	27	101.146	0.280426	5.2e-05	0.000739	5.8e-05	0.02	0.0021	1.46737	6.3e-05	-83.4203	1.87888	0.280375	5.21548e-05	-3.19184	1.96564	3577	7.45	733.384
Vezinet et al., 2018 (EPSL)	LA12_08_anne_10	25.674	0.000617567	4017000	2212	0.0777577	1.3611	1.02082	0.3192	0.18797	32.26	0.960942	0.7347	1.02082	0.63651	3565	5.6	3551	55	3558.1	19	99.6073	0.280499	5.1e-05	0.000955	2e-05	0.02603	0.00026	1.46742	7.1e-05	-80.8388	1.8443	0.280433	5.10195e-05	-1.39962	1.91681	3565	10.2	954.259
Vezinet et al., 2018 (EPSL)	LA12_08_anne_11	9.6636	0.00505995	8280000	8990	0.115462	2.43605	1.46163	0.2416	0.807119	13.71	2.07877	0.4105	1.46163	0.97535	3129	26	2217	56	2727	39	70.8533	0.280595	8.4e-05	0.00227	0.00022	0.0671	0.0074	1.4673	0.00011	-77.444	2.99543	0.280458	8.50464e-05	-10.8716	3.13904	3129	12.24	2453.1
Vezinet et al., 2018 (EPSL)	LA12_08_anne_12	15.923	0.000281401	491000	270	0.22	1.29769	1.03815	0.3825	0.20915	40.7	1.00737	0.7706	1.03815	0.83051	3840.7	6.4	3683	59	3787.7	20	95.894	0.28033	5.4e-05	0.000326	1.4e-05	0.00759	0.00056	1.46725	0.00016	-86.8151	1.94812	0.280306	5.40102e-05	0.662389	2.02925	3840.7	9.21	279.93
Vezinet et al., 2018 (EPSL)	LA12_08_anne_13	5.1204	0.00297263	362000	228	0.460088	1.28535	1.47815	0.388	0.695876	41.62	1.20135	0.778	1.47815	0.80385	3862	21	3708	84	3810	24	96.0124	0.28017	0.00023	0.000302	2.9e-05	0.00855	0.00061	1.46689	0.00046	-92.4731	8.14251	0.280147	0.00023001	-4.47496	8.24545	3862	7.97	313.029
Vezinet et al., 2018 (EPSL)	LA12_08_anne_14	5.1114	0.00097393	385800	256.8	0.699766	1.4556	1.4556	0.3271	0.779578	31.08	1.60875	0.687	1.4556	0.8232	3602	24	3370	78	3521	33	93.5591	0.28037	0.00014	0.001228	1.5e-05	0.0389	0.0018	1.46713	0.0004	-85.4006	4.96576	0.280285	0.000140006	-5.81694	5.05993	3602	6.78	1419.03
Vezinet et al., 2018 (EPSL)	LA12_08_anne_15	8.802	0.00121072	1047000	596	0.751678	1.26646	1.07649	0.3926	0.280183	42.93	1.07151	0.7896	1.07649	0.8711	3880.1	8.5	3752	63	3841	21	96.6985	0.280313	6.6e-05	0.0008593	7.2e-06	0.02382	0.00081	1.4673	0.00016	-87.4162	2.36557	0.280248	6.6003e-05	-0.435143	2.4442	3880.1	9.2	872.723
Vezinet et al., 2018 (EPSL)	LA12_08_anne_16	10.305	0.00082866	2950000	1810	0.0399448	1.37344	1.03008	0.3237	0.262589	32.67	0.994796	0.7281	1.03008	0.74572	3586.8	8.2	3526	57	3570.7	20	98.3049	0.280408	6.9e-05	0.0006888	5.7e-06	0.01877	0.00048	1.4672	0.00013	-84.0568	2.47032	0.28036	6.90015e-05	-3.48055	2.53797	3586.8	10.24	688.113
Vezinet et al., 2018 (EPSL)	LA12_08_anne_17	29.677	0.000673405	577000	272	0.772059	1.31182	1.04946	0.3742	0.213789	39.53	1.01189	0.7623	1.04946	0.86302	3807.7	6.5	3652	58	3758.5	20	95.9109	0.280415	7.1e-05	0.001286	6.5e-05	0.0337	0.0019	1.46735	6.8e-05	-83.8093	2.5402	0.28032	7.11628e-05	0.385922	2.61655	3807.7	5.52	1237.19
Vezinet et al., 2018 (EPSL)	LA12_08_anne_18	39.244	9.14484e-05	4140000	3400	0.0935294	2.19058	1.08434	0.1706	0.263775	10.82	1.20148	0.4565	1.08434	0.9592	2562.2	8.8	2423	44	2505	22	94.5672	0.280708	5.2e-05	0.000768	2e-05	0.02049	0.00085	1.46732	9.1e-05	-73.448	1.87896	0.28067	5.20097e-05	-16.6561	1.927	2562.2	7.73	751.737
Vezinet et al., 2018 (EPSL)	LA12_08_anne_19	23.897	0.000369185	734000	346	0.627168	1.21271	1.0308	0.39	0.153846	44.72	0.972719	0.8246	1.0308	0.8704	3870.1	4.8	3876	60	3881.2	19	100.152	0.280338	6.1e-05	0.000759	1.1e-05	0.01968	0.00038	1.46723	0.0001	-86.5322	2.19131	0.280281	6.10061e-05	0.490558	2.26631	3870.1	8.88	722.775
Vezinet et al., 2018 (EPSL)	LA12_08_anne_20	22.293	0.000351653	774000	378	0.574074	1.25849	1.0068	0.3873	0.167829	42.86	0.968269	0.7946	1.0068	0.83469	3859.7	5.2	3770	58	3839	19	97.676	0.280395	6.3e-05	0.001198	2.4e-05	0.03088	0.00062	1.46718	0.00013	-84.5165	2.26098	0.280305	6.30269e-05	1.10936	2.33581	3859.7	7.5	1134.36
Vezinet et al., 2018 (EPSL)	LA12_08_anne_21	15.023	0.00800074	770000	422	0.774882	1.36986	1.0274	0.3637	0.274952	36.95	1.05548	0.73	1.0274	0.83153	3764.5	8.3	3533	58	3691.9	21	93.8504	0.280376	5.9e-05	0.001162	4.3e-05	0.03184	0.00059	1.46729	0.00011	-85.1884	2.12174	0.280291	5.90845e-05	-1.68101	2.20295	3764.5	7.61	1167.04
Vezinet et al., 2018 (EPSL)	LA12_08_anne_22	10.534	0.000595739	1087000	557	0.728905	1.23168	1.04693	0.384	0.338542	43.38	1.01429	0.8119	1.04693	0.57763	3847	10	3832	60	3850.9	20	99.6101	0.28035	0.00011	0.000835	3.1e-05	0.023	0.0019	1.46721	0.00017	-86.1078	3.90895	0.280288	0.000110025	0.173674	3.98109	3847	9.12	842.866
Vezinet et al., 2018 (EPSL)	LA12_08_anne_23	25.29	0.00828535	1990000	1120	0.0630357	1.45096	1.01567	0.3162	0.173941	30.24	0.975529	0.6892	1.01567	0.75357	3550.4	5.5	3379	53	3494.5	19	95.1724	0.280424	5.4e-05	0.000479	1.3e-05	0.01237	0.00049	1.46725	0.00011	-83.491	1.94815	0.280391	5.40076e-05	-3.24953	2.01752	3550.4	9.43	454.373
Vezinet et al., 2018 (EPSL)	LA12_08_anne_24	39.32	0.00383924	2530000	1343	0.0922561	1.49477	1.27055	0.309	0.307443	28.64	1.34427	0.669	1.27055	0.95969	3514.7	9.8	3299	64	3437	27	93.8629	0.280405	4.7e-05	0.000554	3.8e-05	0.01419	0.00088	1.4673	5.8e-05	-84.1629	1.70621	0.280367	4.7071e-05	-4.94859	1.79217	3514.7	8.43	521.386
Vezinet et al., 2018 (EPSL)	LA12_08_anne_25	28.143	0.00147113	1020000	472	1.05297	1.25565	1.0673	0.3849	0.207846	42.21	0.995025	0.7964	1.0673	0.88307	3850.1	6.3	3775	61	3823.7	20	98.0494	0.28042	5.9e-05	0.001191	8.1e-05	0.0312	0.0028	1.4673	0.0001	-83.6324	2.12175	0.280331	5.93095e-05	1.79725	2.20976	3850.1	8.15	1145.43
Vezinet et al., 2018 (EPSL)	LA12_08_anne_26	10.699	7.14027e-05	577000	279	0.956989	1.22175	1.09957	0.3765	0.358566	42.53	0.964025	0.8185	1.09957	0.72809	3817	11	3855	62	3831.5	19	100.996	0.2805	0.00011	0.00184	0.00018	0.0501	0.0059	1.46733	9.2e-05	-80.8034	3.90897	0.280364	0.000110803	2.17342	4.00924	3817	6.41	1836.73
Vezinet et al., 2018 (EPSL)	LA12_08_anne_27	39.266	0.0006828	368000	166.5	1.05826	1.30395	0.977963	0.3874	0.167785	40.83	0.967426	0.7669	0.977963	0.76574	3859.9	5.1	3669	56	3790.8	19	95.0543	0.280426	8.2e-05	0.001589	4.5e-05	0.04136	0.00065	1.46733	0.0001	-83.4203	2.92527	0.280307	8.20708e-05	1.17761	2.99551	3859.9	4.99	1518.79
Vezinet et al., 2018 (EPSL)	LA12_08_anne_28	28.815	2.86916e-05	659000	291	0.611684	1.24023	0.992187	0.3878	0.167612	43.05	0.952381	0.8063	0.992187	0.72533	3861.7	5.1	3811	58	3843.5	19	98.6871	0.280362	5.3e-05	0.001017	2.8e-05	0.02571	0.00045	1.46733	0.0001	-85.6835	1.91348	0.280286	5.30425e-05	0.461144	1.99509	3861.7	7.22	945.135
Vezinet et al., 2018 (EPSL)	LA12_08_anne_29	26.697	0.000127252	607000	268	0.69403	1.23381	0.987045	0.3883	0.167396	43.39	0.956442	0.8105	0.987045	0.71519	3863.4	5	3826	57	3852.1	18	99.0319	0.280383	5.6e-05	0.00091	4.5e-05	0.0235	0.0006	1.46734	8.5e-05	-84.9409	2.01751	0.280315	5.61019e-05	1.53562	2.09886	3863.4	8.27	863.2
Vezinet et al., 2018 (EPSL)	LA12_08_anne_30	33.887	0.000581326	1125000	502	0.705179	1.27632	0.957243	0.3853	0.105113	41.55	0.938628	0.7835	0.957243	0.76196	3851.9	3.2	3729.8	56	3808.2	19	96.8301	0.280334	5e-05	0.001213	6.3e-05	0.0317	0.0013	1.46729	7.8e-05	-86.6736	1.80969	0.280244	5.02218e-05	-1.28788	1.89708	3851.9	7.19	1163.89
Vezinet et al., 2018 (EPSL)	LA12_08_anne_31	5.5677	0.000763587	1224000	598	0.764214	1.20192	1.08173	0.3889	0.39856	44.66	1.07479	0.832	1.08173	0.73601	3866	12	3902	65	3880	21	100.931	0.280309	8.1e-05	0.000916	1.8e-05	0.02576	0.00082	1.46709	0.00016	-87.5577	2.8902	0.28024	8.10121e-05	-1.05985	2.97026	3866	9.04	943.332
Vezinet et al., 2018 (EPSL)	LA12_08_anne_32	8.6344	0.000315207	701400	337	0.816024	1.21109	1.08998	0.3795	0.355731	43.76	1.01691	0.8257	1.08998	0.76106	3829	11	3880	65	3859.6	20	101.332	0.28034	0.00011	0.001019	1.9e-05	0.02907	0.00092	1.46708	0.00011	-86.4614	3.90895	0.280264	0.00011001	-1.09158	3.98161	3829	7.65	1064.02
Vezinet et al., 2018 (EPSL)	LA12_08_anne_33	19.9	0.00086255	641000	303	0.543564	1.26358	1.01087	0.3846	0.26001	42.52	0.98777	0.7914	1.01087	0.71998	3849.1	7.7	3758	59	3831.1	20	97.6332	0.280289	5.2e-05	0.000733	8.7e-06	0.01996	0.00057	1.46727	8.4e-05	-88.2649	1.87884	0.280234	5.20047e-05	-1.68231	1.9644	3849.1	9.67	731.757
Vezinet et al., 2018 (EPSL)	LA12_08_anne_34	28.343	0.000504556	327000	149.6	0.882353	1.26759	1.01407	0.3865	0.181113	42.57	0.951374	0.7889	1.01407	0.68054	3856.7	5.6	3749	57	3832.2	19	97.2075	0.28037	5.7e-05	0.001141	6e-05	0.029	0.0023	1.46731	8.2e-05	-85.4006	2.05223	0.280285	5.71772e-05	0.299629	2.13609	3856.7	6.2	1065.86
Vezinet et al., 2018 (EPSL)	LA12_08_anne_35	9.9653	0	580000	285	0.678947	1.24285	1.05643	0.3863	0.220036	43.49	0.988733	0.8046	1.05643	0.83633	3855.7	6.5	3805	60	3853.4	20	98.6851	0.28035	0.00012	0.001697	1.1e-05	0.0451	0.0022	1.46736	0.00014	-86.1078	4.26099	0.280223	0.000120004	-1.91786	4.32892	3855.7	6.26	1654.86
Vezinet et al., 2018 (EPSL)	LA12_08_anne_36	6.1826	0.00146378	346100	187	0.644385	1.45201	1.08901	0.3404	0.587544	32.83	1.2184	0.6887	1.08901	0.69903	3664	18	3378	57	3575	24	92.1943	0.28043	0.00011	0.0012092	5.5e-06	0.02998	0.00049	1.46731	0.00022	-83.2788	3.90896	0.280344	0.000110002	-2.20045	3.99179	3664	6.77	1102.93
Vezinet et al., 2018 (EPSL)	LA12_08_anne_37	27.169	0.000952689	586000	274	0.711679	1.25031	1.00025	0.3839	0.182339	42.82	0.969173	0.7998	1.00025	0.79909	3846.5	5.5	3788	59	3838.1	19	98.4791	0.280389	5.8e-05	0.00103	0.00011	0.0278	0.0041	1.4673	8.3e-05	-84.7287	2.08698	0.280312	5.85765e-05	1.03539	2.18334	3846.5	7.6	1019.5
Vezinet et al., 2018 (EPSL)	LA12_08_anne_38	39.243	0.000249508	3420000	1640	0.0351829	1.34282	1.00712	0.3246	0.200246	33.68	0.97981	0.7447	1.00712	0.78775	3590.8	6.4	3588	55	3600.2	19	99.922	0.280443	4.2e-05	0.000564	1.3e-05	0.01602	0.0003	1.46738	6.5e-05	-82.8191	1.53451	0.280404	4.20101e-05	-1.83035	1.61786	3590.8	12.1	586.453
Vezinet et al., 2018 (EPSL)	LA12_08_anne_39	9.8643	0.00219073	752000	368.8	0.662419	1.16686	1.16686	0.3908	0.230297	46.01	1.08672	0.857	1.16686	0.89886	3873.2	6.9	3989	70	3909	22	102.99	0.280287	8.1e-05	0.0007618	6.4e-06	0.02197	0.00074	1.46717	0.00013	-88.3357	2.8902	0.28023	8.10019e-05	-1.26373	2.9607	3873.2	11.87	803.855
Vezinet et al., 2018 (EPSL)	LA12_08_anne_40	29.241	0.000761018	923000	443	0.577878	1.22026	0.976205	0.3897	0.141134	43.78	0.947921	0.8195	0.976205	0.724	3869	4.4	3858	58	3860.1	19	99.7157	0.280442	7.1e-05	0.001841	6.4e-05	0.0492	0.0023	1.4673	0.0001	-82.8545	2.5402	0.280304	7.11645e-05	1.28357	2.61595	3869	7.66	1804.94
Vezinet et al., 2018 (EPSL)	LA12_08_anne_41	39.256	0	108400	53	0.60566	1.28403	1.02722	0.3826	0.248301	40.73	0.994353	0.7788	1.02722	0.58495	3840.7	7.5	3712	57	3788.2	20	96.649	0.280297	6.4e-05	0.000512	2.7e-05	0.0132	0.00061	1.4673	9.4e-05	-87.982	2.29581	0.280259	6.40317e-05	-1.00829	2.37326	3840.7	4.91	484.891
Vezinet et al., 2018 (EPSL)	LA12_08_anne_42	39.244	0.000835498	397000	196	0.892857	1.27405	1.01924	0.3779	0.145541	40.63	0.972188	0.7849	1.01924	0.79272	3822.5	4.5	3734	57	3785.9	19	97.6848	0.280367	4.1e-05	0.0007659	4.5e-06	0.02074	0.00048	1.46734	5.9e-05	-85.5067	1.50028	0.28031	4.10022e-05	0.388151	1.59065	3822.5	7.35	760.504
Vezinet et al., 2018 (EPSL)	LA12_08_anne_43	11.394	0.00111637	1576000	858	0.677156	1.26582	1.01266	0.3896	0.166838	42.35	0.979929	0.79	1.01266	0.83784	3868.6	4.9	3753	58	3827.2	19	97.0118	0.280359	7.3e-05	0.00169	0.0001	0.0474	0.0018	1.46709	0.00013	-85.7896	2.61011	0.280232	7.33856e-05	-1.28345	2.69339	3868.6	8.96	1735.95
Vezinet et al., 2018 (EPSL)	LA12_08_anne_44	30.792	0.000299652	696000	365	0.0238082	1.31475	0.986063	0.3672	0.272331	38.4	1.01562	0.7606	0.986064	0.79821	3778.7	8.3	3646	56	3729.8	20	96.4882	0.280361	4.5e-05	0.0002502	7e-06	0.00536	0.00012	1.46733	6.3e-05	-85.7188	1.63738	0.280343	4.5003e-05	0.490542	1.72919	3778.7	10.01	198.391
Vezinet et al., 2018 (EPSL)	LA12_08_anne_45	23.881	0.00207474	501000	291	0.395189	1.37684	1.03263	0.349	0.243553	34.89	0.974491	0.7263	1.03263	0.72685	3701.7	7.6	3519	56	3635.2	19	95.0644	0.28037	5e-05	0.000648	5.9e-05	0.0161	0.0019	1.46724	0.0001	-85.4006	1.8097	0.280324	5.01784e-05	-2.03737	1.89725	3701.7	8.91	592.252
1 Grey font data are those that did not pass the analytical screening (see Methods section of the main manuscript); black font are those that did pass the analytical filter and black font+bold font+orange background are the least disturbed analyses of our dataset.
2 Percentage of the common Pb on the 206Pb calculated using the Hg-interference- and background-corrected 204Pb signal and common Pb model composition of Stacey and Kramers (1975).
3 Data not corrected for common-Pb.
4 207Pb/235U = 207Pb/206Pb/(238U/206Pb*1/137.88).
5 Correlation coefficient between errors of 206Pb/238U and 207Pb/235U.
6 Degree of concordance = (206Pb/238U age / 207Pb/206Pb age) × 100.
7 (176Hf/177Hf)measured: ratio corrected from Yb- and Lu-interference.
8 Calculated using Bouvier et al., (2008) model values: 176Hf/177Hf=0.282785±11 and 176Lu/177Hf=0.0336±1.
9 Calculated using decay-constant λ(176Lu) = 1.867 · 10-11 (Söderlund et al., 2004).
10 Interference correction expressed in εHf units calcualted as follow: [((176Yb/177Hf)+(176Lu/177Hf))/0.282785]· 104.
11 The "N" subscript stands for normalization to the CI chondrite values of McDonough and Sun (1995).
12 Eu/Eu*=EuN/(SmN+GdN)1/2.
13 Ce/Ce*=CeN/(LaN+PrN)1/2.
L.O.D.: Limit Of Detection
[truncated: 30 more columns]

## Sheet: RM Pb-Hf LASS analyses
U-Pb/Hf Zircon Reference Material Analyses (Vezinet al., 2019 - Geology)
		Composition				Data for Tera-Wasserburg diagram2				Data for Wetherill diagram3					Dates (Ma)							Hf isotope ratios corrected from mass biais fractionation
Analysis Label	Integration time of the U-Pb/Hf LASS analyses (second)	f206Pbc (%)1	206Pb (cps)	U (ppm)	Th/U	238U/206Pb	1S.E. (%)	207Pb/206Pb	1S.E. (%)	207Pb/235U3	1S.E. (%)	206Pb/238U	1S.E. (%)	Rho4	207Pb/206Pb	2 S.E. (abs)	206Pb/238U	2 S.E. (abs)	207Pb/235U	2 S.E. (abs)	Concordance (%)5	(176Hf/177Hf)measured6	2 S.E. (abs)	(176Lu/177Hf)measured	2 S.E. (abs)	(176Yb/177Hf)measured	2 S.E. (abs)	(178Hf/177Hf)measured	2 S.E. (abs)	εHf(0)7	2 S.E.	Total Hf (V)	Correction expressed in εHf units8
2018 March, 6th
MUN__1_1	39.201																					0.282156	3.1e-05	0.000685	2.6e-05	0.0227	0.0012	1.46731	4.2e-05	-22.243	1.16551	16.9	826.953
MUN__1_2	39.286																					0.282126	2.6e-05	0.0004762	4.9e-06	0.014268	9.9e-05	1.46729	5.4e-05	-23.3039	1.00031	17	521.393
MUN__1_3	39.223																					0.282158	4.1e-05	0.001359	5.1e-05	0.0474	0.0019	1.46727	4.6e-05	-22.1723	1.50425	16.3	1724.24
MUN__1_4	39.25																					0.282129	2.8e-05	0.0005306	4.3e-06	0.01645	0.00018	1.46732	3.6e-05	-23.1978	1.06596	16.9	600.477
MUN__1_5	39.324																					0.282149	2.7e-05	0.000762	1.6e-05	0.02608	0.00061	1.46729	4.6e-05	-22.4906	1.03298	17.4	949.202
MUN__1_6	39.212																					0.282126	2.8e-05	0.0004721	7.3e-06	0.01464	0.00012	1.46734	3.5e-05	-23.3039	1.06597	19.8	534.402
MUN__1_7	39.234																					0.282139	2.8e-05	0.000569	1.3e-05	0.01818	0.00079	1.46732	4.7e-05	-22.8442	1.06593	17.7	663.013
MUN__1_8	39.263																					0.282164	2.7e-05	0.0005564	2.1e-06	0.01791	0.00011	1.46733	3.5e-05	-21.9601	1.03293	19.5	653.019
MUN__3_1	39.233																					0.282152	4.5e-05	0.002521	1.9e-05	0.081	0.0014	1.46735	4.7e-05	-22.3845	1.64164	17.5	2953.52
MUN__3_2	39.222																					0.282173	5e-05	0.0026041	3.1e-06	0.07887	0.00077	1.4673	5.1e-05	-21.6419	1.81416	11.2	2881.13
MUN__3_3	39.191																					0.282139	4.3e-05	0.0025707	5.6e-06	0.07882	0.00052	1.46737	5.5e-05	-22.8442	1.57293	14.3	2878.18
MUN__3_4	39.193																					0.282169	4.9e-05	0.00379	2.1e-05	0.12834	0.00049	1.46734	4.1e-05	-21.7833	1.77958	17.5	4672.45
MUN__3_5	39.211																					0.282155	4.1e-05	0.0028253	6.2e-06	0.09315	0.0006	1.46731	4.9e-05	-22.2784	1.50427	18.7	3393.93
MUN__3_6	30.859																					0.282192	5.2e-05	0.0026507	9.9e-06	0.08279	0.00092	1.46731	4.9e-05	-20.97	1.88333	13.3	3021.4
MUN__3_7	39.179																					0.28215	3.7e-05	0.002772	7.5e-06	0.08704	0.00057	1.46729	5.9e-05	-22.4552	1.36784	16.6	3175.98
Z_LH94_15_1	31.893	0	1072000	356	0.682501	3.02206	0.98217	0.11163	0.300099	5.072	1.28155	0.3309	0.98217	0.86685	1825.1	11	1842.4	32	1831.2	21	100.948	0.281679	3.6e-05	0.0007184	3.6e-06	0.02298	0.0002	1.46731	4.7e-05	-39.111	1.33594	13.1	838.036
Z_LH94_15_2	31.669	0	835700	279.2	0.596303	3.06279	1.01072	0.11201	0.29908	5.037	1.19119	0.3265	1.01072	0.84847	1831.4	11	1821.2	32	1826.3	20	99.443	0.28173	3.7e-05	0.000502	1.4e-05	0.01552	0.00033	1.46733	4.7e-05	-37.3075	1.36971	13.33	566.579
Z_LH94_15_3	31.893	0	1118000	368	0.685871	3.0722	0.998464	0.11181	0.317503	5.036	1.19142	0.3255	0.998464	0.77327	1828	12	1816.3	32	1825.3	21	99.36	0.281708	3.6e-05	0.000694	8.6e-06	0.02231	0.00054	1.46732	4.4e-05	-38.0855	1.33581	13.84	813.48
Z_LH94_15_4	17.657	0	913000	308	0.658328	2.98151	1.04353	0.11232	0.333868	5.229	1.24307	0.3354	1.04353	0.89076	1836.3	12	1868	30	1857.3	21	101.726	0.281724	4e-05	0.000544	4.6e-05	0.0174	0.0014	1.46731	6.6e-05	-37.5197	1.47215	14.3	634.546
Z_LH94_15_5	39.24	0	1170000	364	0.666889	3.04507	0.989647	0.1119	0.294906	5.078	1.18157	0.3284	0.989647	0.79235	1829.5	11	1831.8	30	1832.2	21	100.126	0.281728	3.6e-05	0.0004477	7.6e-06	0.01362	0.00015	1.46731	5.4e-05	-37.3782	1.33572	13.1	497.47
Z_LH94_15_6	39.215	0	569000	176	0.632911	3.03767	1.048	0.11185	0.308449	5.075	1.28079	0.3292	1.048	0.91404	1828.7	11	1834	33	1831.3	22	100.29	0.281736	2.2e-05	0.000383	2.1e-05	0.01169	0.00081	1.46729	4.4e-05	-37.0953	0.872396	11.61	426.932
Z_LH94_15_7	39.379	0	955000	283	0.670331	3.00662	1.00722	0.11184	0.312947	5.112	1.27152	0.3326	1.00722	0.79245	1829.4	11	1851	32	1837.9	21	101.181	0.281759	4.1e-05	0.0006895	8.4e-06	0.02182	0.00026	1.46732	4.9e-05	-36.282	1.50624	12.2	795.993
Z_LH94_15_8	39.235	0	729000	217	0.623986	3.0656	0.996321	0.1116	0.304659	5.006	1.19856	0.3262	0.996321	0.77748	1824.6	11	1820	32	1820.1	21	99.7479	0.281724	3.6e-05	0.000535	2.2e-05	0.01657	0.00063	1.46731	4.9e-05	-37.5197	1.33574	11.63	604.876
Z_LH94_15_9	39.268	0	1015000	301	0.686248	3.03767	0.987242	0.11206	0.307871	5.067	1.18413	0.3292	0.987242	0.6925	1831.9	11	1834.6	32	1830.5	21	100.147	0.281748	2.9e-05	0.0007156	5.2e-06	0.02266	0.00029	1.46732	5.2e-05	-36.671	1.10034	12.4	826.621
Z_LH94_15_10	19.945	0	842400	256	0.652188	3.003	1.02102	0.11205	0.348059	5.144	1.26361	0.333	1.02102	0.73791	1831.8	13	1853	33	1843.4	21	101.157	0.281687	4.6e-05	0.000484	1.1e-05	0.01521	0.00027	1.46732	5.5e-05	-38.8281	1.67871	14.6	554.98
Z_LH94_15_11	21.897	0	1461000	432	0.719424	3.02663	0.998789	0.11177	0.30867	5.092	1.27651	0.3304	0.998789	0.82447	1827.5	11	1840.5	32	1834.6	21	100.711	0.281724	3.9e-05	0.0007907	8e-06	0.02506	0.00014	1.46731	6.3e-05	-37.5197	1.43795	14.9	914.147
Z_LH94_15_12	39.209	0	1072000	302	0.663967	3.04321	1.01948	0.11181	0.330919	5.073	1.28129	0.3286	1.01948	0.78218	1827.8	12	1831	33	1831.2	21	100.175	0.281731	2.7e-05	0.0004591	4.1e-06	0.014269	5.6e-05	1.4673	5.4e-05	-37.2721	1.0343	12.9	520.823
Z_LH94_15_13	32.153	0	1212000	345	0.719424	3.06185	1.08696	0.11215	0.383415	5.054	1.28611	0.3266	1.08696	0.80723	1835.3	13	1822	34	1828	22	99.2753	0.281692	3.1e-05	0.000689	1.9e-05	0.0224	0.00078	1.46732	5.3e-05	-38.6513	1.16722	13.95	816.486
Z_LH94_15_14	24.788	0	1655000	468	0.657462	3.06091	1.04071	0.11235	0.364931	5.068	1.28256	0.3267	1.04071	0.76175	1836.5	13	1822	33	1830.5	21	99.2105	0.281716	3.1e-05	0.0004676	5.3e-06	0.01488	0.00029	1.46732	5.9e-05	-37.8026	1.16713	16.4	542.73
Z_LH94_15_15	20.311	0	974000	280	0.719942	3.05343	1.00763	0.11243	0.337988	5.056	1.2856	0.3275	1.00763	0.77385	1837.9	12	1826	32	1828.6	21	99.3525	0.281712	3.9e-05	0.000582	4.9e-05	0.0187	0.0015	1.46727	5.3e-05	-37.944	1.438	14.5	681.861
Z_LH94_15_16	13.028	0	1131000	330	0.663658	3.01568	1.07057	0.11135	0.314324	5.08	1.27953	0.3316	1.07057	0.89442	1820.6	11	1846	35	1832.6	22	101.395	0.281725	3.9e-05	0.0004685	2.6e-06	0.01488	0.00012	1.46737	0.0001	-37.4843	1.43794	16	542.762
Z_Mudtank_1	31.678	0	40700	30.6	0.447027	8.53242	1.10921	0.0638	0.940439	1.028	1.41051	0.1172	1.10922	0.029105	726	39	714.6	15	717.3	15	98.4298	0.282514	3e-05	4.429e-05	4.3e-07	0.001588	2.8e-05	1.46727	5e-05	-9.58325	1.1309	12.13	57.7219
Z_Mudtank_2	39.328	0	43700	34.1	0.416493	8.65801	1.08225	0.0656	0.838415	1.047	1.38491	0.1155	1.08225	0.10906	784	36	704.8	14	727.1	14	89.898	0.28254	3.4e-05	4.612e-05	6.2e-07	0.001652	4e-05	1.46734	5.8e-05	-8.66383	1.26468	12.7	60.0499
Z_Mudtank_3	39.317	0	36500	27.2	0.44484	8.726	1.13438	0.0655	0.839695	1.042	1.39155	0.1146	1.13438	0.40549	788	35	699.2	15	724.4	14	88.731	0.282504	3.1e-05	3.77e-05	1.4e-06	0.001404	5.8e-05	1.46731	5.6e-05	-9.93688	1.16424	12.73	50.9822
Z_Mudtank_4	39.323	0	29320	19.39	0.428266	8.74126	1.18007	0.0652	1.15031	1.022	1.61448	0.1144	1.18007	0.38731	765	48	698.3	16	713	17	91.281	0.282521	3.2e-05	3.131e-05	6.8e-07	0.001144	2.5e-05	1.46734	4.6e-05	-9.33571	1.19759	12.9	41.562
Z_Mudtank_5	39.274	0	27860	18.4	0.40568	8.65801	1.12554	0.0648	1.23457	1.024	1.66016	0.1155	1.12554	0.21989	748	52	704.7	15	717	18	94.2112	0.282508	3e-05	2.902e-05	3.3e-07	0.001079	2.8e-05	1.46726	4.2e-05	-9.79543	1.13092	12.9	39.1824
Z_Mudtank_6	26.694	0	29310	17.98	0.41841	8.62813	1.1648	0.0644	1.1646	1.029	1.74927	0.1159	1.1648	0.40629	752	52	706.9	16	717	18	94.0027	0.282502	3.3e-05	3.41e-05	1.1e-06	0.001242	3.8e-05	1.46734	4.7e-05	-10.0076	1.2312	11.09	45.1262
Z_Mudtank_7	26.176	0	36300	26.2	0.363108	8.90472	1.24666	0.0638	1.17555	0.992	1.71371	0.1123	1.24666	0.27657	732	54	686	16	699	17	93.7158	0.282556	3.2e-05	3.451e-05	4.9e-07	0.001277	2.9e-05	1.46731	4.6e-05	-8.09803	1.19746	14.7	46.3783
Z_Mudtank_8	39.125	0	33840	22	0.454752	8.74891	1.13736	0.065	1.07692	1.027	1.50925	0.1143	1.13736	0.29512	762	43	697.7	15	716.3	16	91.5617	0.282531	2.7e-05	3.64e-05	1.6e-06	0.00132	5.2e-05	1.46731	5.6e-05	-8.98209	1.03178	12.9	47.9658
Z_Mudtank_9	39.256	0	46200	30.7	0.471254	8.59845	1.1178	0.06413	0.732886	1.029	1.36054	0.1163	1.1178	0.40586	743	33	709.1	15	717.8	14	95.4374	0.282502	3e-05	4.664e-05	6.9e-07	0.001697	3.4e-05	1.46731	5.3e-05	-10.0076	1.13094	12.9	61.6596
Z_Mudtank_10	39.233	0	44900	29.2	0.494805	8.5034	1.14796	0.0638	0.862069	1.034	1.45068	0.1176	1.14796	0.32736	726	38	716.8	15	720	15	98.7328	0.282516	3.7e-05	4.371e-05	9.3e-07	0.001598	4.7e-05	1.46731	5.8e-05	-9.51253	1.36621	13.1	58.0551
Z_Plesovice_1	25.34	0	179600	364	0.0868056	18.6046	1.02326	0.05274	0.568828	0.3903	1.28107	0.05375	1.02326	0.25591	314	26	337.5	6.9	334.5	7.4	107.484	0.282485	3.1e-05	7.69e-05	2e-06	0.003091	5.8e-05	1.46732	7.1e-05	-10.6088	1.1643	17.1	112.025
Z_Plesovice_2	35.168	0	218400	440	0.0952381	19.1241	1.05183	0.05326	0.478783	0.3833	1.27837	0.05229	1.05183	0.33039	340	23	328.6	6.4	329.4	7.1	96.6471	0.282494	1.8e-05	6.82e-05	1.1e-06	0.002865	4.4e-05	1.46737	4.9e-05	-10.2905	0.746533	15.7	103.725
Z_Plesovice_3	24.606	0	296300	611	0.0847817	18.6289	1.02459	0.0527	0.512334	0.3903	1.28107	0.05368	1.02459	0.030285	313	23	337.1	6.8	334.5	7.4	107.7	0.282471	2.9e-05	6.579e-05	6.1e-07	0.00283	4.4e-05	1.46733	4.6e-05	-11.1038	1.09788	16.4	102.403
Z_Plesovice_4	39.213	0	205600	397	0.0785176	19.0404	1.04722	0.05257	0.456534	0.3818	1.29649	0.05252	1.04722	0.64517	307	21	330	6.6	328.3	7.3	107.492	0.282504	2.8e-05	7.329e-05	6.6e-07	0.002974	2.3e-05	1.46733	4.1e-05	-9.93688	1.06474	15.9	107.76
Z_Plesovice_5	39.248	0	258400	486	0.08726	18.6811	1.02746	0.05306	0.442895	0.3926	1.26083	0.05353	1.02746	0.3917	329	20	336.1	6.6	336.2	7.2	102.158	0.282493	2.5e-05	8.54e-05	5.5e-06	0.00359	0.0002	1.4673	5e-05	-10.3259	0.966694	14.8	129.972
Z_Plesovice_6	39.251	0	184100	345	0.0885191	19.1388	1.05263	0.05365	0.438024	0.3873	1.29099	0.05225	1.05263	0.62737	354	20	328.3	6.6	332.3	7.3	92.7401	0.282461	1.9e-05	7.189e-05	4.2e-07	0.002934	2e-05	1.4673	3.9e-05	-11.4575	0.777034	16.6	106.296
Z_Plesovice_7	21.867	0	332900	645.7	0.10582	19.015	1.04583	0.05338	0.477707	0.387	1.42119	0.05259	1.04583	0.81888	343	22	330.4	6.8	332.1	7.7	96.3265	0.282489	4.4e-05	0.000123	1.3e-05	0.00518	0.00052	1.46727	8.2e-05	-10.4673	1.60542	13.71	187.528
Z_Plesovice_8	39.241	0	300000	542	0.0772798	19.0186	1.04603	0.05285	0.416272	0.382	1.26963	0.05258	1.04603	0.533	320	19	330.3	6.5	328.5	7.1	103.219	0.282504	2.3e-05	6.54e-05	2.2e-06	0.002889	8.2e-05	1.4673	4.9e-05	-9.93688	0.902302	16.3	104.475
Z_Plesovice_9	39.247	0	207100	357	0.0746269	19.0658	1.04862	0.05286	0.491865	0.3824	1.28138	0.05245	1.04862	0.45847	319	23	329.5	6.8	328.7	7.2	103.292	0.282492	2.8e-05	7.357e-05	5e-07	0.003012	3.8e-05	1.46728	4.4e-05	-10.3612	1.06478	16	109.114
Z_Plesovice_10	21.682	0	302000	552	0.0825287	18.843	1.03637	0.05255	0.570885	0.3847	1.29971	0.05307	1.03637	0.16267	306	26	333.3	6.6	330.4	7.4	108.922	0.282499	2.9e-05	6.684e-05	8.4e-07	0.002848	3.3e-05	1.46735	6.6e-05	-10.1137	1.09778	17.5	103.076
Z_Plesovice_11	25.424	0	278000	490	0.0817661	18.9537	1.04246	0.05283	0.548931	0.3863	1.29433	0.05276	1.04246	0.47327	319	25	331.4	6.7	331.6	7.4	103.887	0.282497	3.1e-05	6.34e-05	1.9e-06	0.00266	5.8e-05	1.46741	5.8e-05	-10.1844	1.16426	17.9	96.3064
Z_Plesovice_12	39.222	0	285000	484	0.0805218	18.8715	1.03793	0.05271	0.398406	0.386	1.26943	0.05299	1.03793	0.65555	314	18	332.9	6.6	331.4	7.2	106.019	0.282516	2.6e-05	6.123e-05	9.2e-07	0.002632	6.2e-05	1.46732	4.6e-05	-9.51253	0.999133	15.9	95.2395
Z_Plesovice_13	39.204	0	216300	352	0.0840336	19.0259	1.04642	0.05299	0.500094	0.3818	1.28339	0.05256	1.04642	0.64633	325	23	330.2	7	328.3	7.2	101.6	0.282474	2.1e-05	5.918e-05	8.2e-07	0.002561	5e-05	1.46734	4.9e-05	-10.9978	0.839048	16.3	92.6563
Z_Plesovice_14	28.567	0	396000	676	0.0866401	18.8679	1.03774	0.05275	0.492891	0.3835	1.26467	0.053	1.03774	0.5278	315	22	332.9	6.8	329.6	7.1	105.683	0.282483	3.2e-05	7.96e-05	1.1e-06	0.003477	7.3e-05	1.46731	5.2e-05	-10.6795	1.19774	17.1	125.77
2017 October, 11th
MUN_1_1	39.291																					0.282162	2.4e-05	0.000872	1.8e-05	0.02851	0.00041	1.46725	3.9e-05	-22.0309	0.935302	8.38	1039.02
MUN_1_2	39.32																					0.282087	1.9e-05	0.00055169	4.5e-07	0.01793	0.00024	1.46727	3.5e-05	-24.6831	0.777806	9.1	653.56
MUN_1_3	39.55																					0.282119	1.9e-05	0.0005268	1.7e-06	0.01633	0.00026	1.46731	2.7e-05	-23.5515	0.77774	8.48	596.1
MUN_1_4	39.244																					0.28214	1.7e-05	0.0007407	1.8e-06	0.02409	0.00036	1.46726	2.8e-05	-22.8088	0.717191	9.32	878.077
MUN_1_5	39.295																					0.282119	2.5e-05	0.0011213	5.4e-06	0.03706	0.00025	1.46724	3.1e-05	-23.5515	0.967768	8.09	1350.19
MUN_1_6	39.228																					0.282135	2.7e-05	0.0010354	3.4e-06	0.0344	0.0003	1.46726	3.2e-05	-22.9857	1.03302	8.47	1253.09
MUN_1_7	39.313																					0.28215	1.9e-05	0.000718	2.4e-05	0.0232	0.0012	1.4673	2.7e-05	-22.4552	0.777676	9.28	845.802
MUN_4_1	39.365																					0.282153	3.4e-05	0.004294	2.6e-05	0.1346	0.0018	1.4673	3.3e-05	-22.3491	1.26625	8.96	4911.65
MUN_4_2	39.282																					0.28217	3.8e-05	0.004369	3.8e-05	0.1359	0.0022	1.46726	2.8e-05	-21.748	1.40176	8.95	4960.27
MUN_4_3	39.27																					0.28215	3.3e-05	0.004098	2e-05	0.1276	0.0014	1.46735	2.8e-05	-22.4552	1.23258	9.15	4657.18
MUN_4_4	39.382																					0.282212	4.1e-05	0.004587	2e-05	0.1432	0.0022	1.46733	3.7e-05	-20.2627	1.50398	8.71	5226.13
MUN_4_5	39.251																					0.282102	3.5e-05	0.004345	1.6e-05	0.1336	0.0017	1.4673	3.1e-05	-24.1526	1.30024	8.99	4878.09
MUN_4_6	39.339																					0.282097	1.7e-05	0.004591	2e-05	0.1425	0.0017	1.46729	3.1e-05	-24.3294	0.717269	8.85	5201.51
MUN_4_7	39.288																					0.282138	4.1e-05	0.004494	1.9e-05	0.1396	0.0018	1.46732	2.3e-05	-22.8796	1.50435	9.25	5095.53
Z_GJ1_1	39.283	0	120100	300	0.0271003	10.4004	0.572023	0.06058	0.404424	0.8009	0.686727	0.09615	0.572023	0.34229	621	18	591.8	6.3	597.2	6	95.2979	0.282049	2.4e-05	0.00027944	4.9e-07	0.007843	8.1e-05	1.46732	2.9e-05	-26.0268	0.935612	6.62	287.23
Z_GJ1_2	39.271	0	121800	308	0.0273149	10.4679	0.575735	0.06029	0.33173	0.788	0.628173	0.09553	0.575735	0.4071	612	14	588.1	6.5	589.9	5.6	96.0948	0.282007	2.5e-05	0.00027966	4.4e-07	0.00784	6.1e-05	1.46726	4.1e-05	-27.5121	0.96809	6.66	287.132
Z_GJ1_3	32.938	0.00172926	132600	364	0.0264131	10.5197	0.578582	0.06072	0.378788	0.7967	0.690348	0.09506	0.578582	0.50436	630	15	585.4	6.3	594.8	6	92.9206	0.282042	2.3e-05	0.00027805	3.3e-07	0.007846	8.3e-05	1.46731	3.6e-05	-26.2744	0.903505	6.97	287.287
Z_GJ1_4	39.262	0.00149757	121500	326	0.0267237	10.5363	0.684859	0.06047	0.529188	0.7948	0.629089	0.09491	0.684859	0.1012	622	26	584.4	7.7	593.7	6	93.955	0.282065	2.9e-05	0.00027848	4.3e-07	0.00779	7.1e-05	1.46729	3.8e-05	-25.461	1.09926	6.57	285.322
Z_GJ1_5	39.301	0	124800	365	0.0232612	10.4221	0.625326	0.0601	0.349418	0.7922	0.631154	0.09595	0.625326	0.57609	605	15	590.6	6.9	592.2	5.9	97.6198	0.28202	2.9e-05	0.0002801	5.4e-07	0.007892	7.1e-05	1.46731	3.9e-05	-27.0524	1.09941	6.61	288.986
Z_GJ1_6	39.301	0	124000	361	0.0230521	10.4047	0.572261	0.06042	0.397219	0.7981	0.689137	0.09611	0.572261	0.49407	615	17	591.6	6.4	595.6	6	96.1951	0.282062	2.4e-05	0.00028024	3.9e-07	0.007832	8e-05	1.4673	3.3e-05	-25.5671	0.935576	6.54	286.87
Z_GJ1_7	35.736	0	128600	416	0.0243072	10.4679	0.575735	0.06058	0.39617	0.8036	0.6222	0.09553	0.575735	0.26602	622	17	588.2	6.6	598.8	5.7	94.5659	0.282029	2.4e-05	0.00027903	4.8e-07	0.007838	8e-05	1.46734	2.9e-05	-26.7341	0.935667	6.95	287.039
Z_GJ1_8	39.246	0	125000	402	0.0229674	10.4112	0.572619	0.05999	0.383397	0.8043	0.621659	0.09605	0.572618	0.36004	600	17	591.2	6.7	599.1	5.8	98.5333	0.281986	2.2e-05	0.00027971	4.3e-07	0.007846	8.5e-05	1.46732	3.2e-05	-28.2547	0.871776	6.77	287.346
Z_GJ1_9	39.327	0	126700	453	0.0276167	10.408	0.62448	0.06027	0.365024	0.7908	0.695498	0.09608	0.62448	0.62048	611	16	591.4	6.9	591.4	6.2	96.7921	0.282021	2.8e-05	0.00028013	3.4e-07	0.007813	7.4e-05	1.46732	3.4e-05	-27.017	1.06632	6.67	286.194
Z_GJ1_10	39.325	0	124700	442	0.0291545	10.3842	0.623053	0.06022	0.43175	0.7889	0.697173	0.0963	0.623053	0.41511	608	19	592.7	7.1	590.4	6	97.4836	0.282041	2.2e-05	0.00027991	5.6e-07	0.007795	6.6e-05	1.46732	3.1e-05	-26.3097	0.87164	6.66	285.549
Z_GJ1_11	24.983	0	148600	614	0.0326477	10.3563	0.673156	0.05983	0.442922	0.7992	0.688188	0.09656	0.673157	0.50963	595	19	594.2	7.6	596.3	6.1	99.8655	0.281994	2.9e-05	0.00027899	4.1e-07	0.007963	8.3e-05	1.46733	3.6e-05	-27.9718	1.0995	7.71	291.458
Z_GJ1_12	34.582	0	121600	475	0.0309598	10.3972	0.571845	0.06036	0.430749	0.8047	0.683485	0.09618	0.571844	0.43271	613	19	591.9	6.6	599.3	6.3	96.5579	0.28201	3.6e-05	0.00027988	7.4e-07	0.007749	6.3e-05	1.4673	4.4e-05	-27.406	1.3345	6.19	283.922
Z_GJ1_13	39.264	0	129200	584	0.0322373	10.3993	0.571964	0.0606	0.379538	0.7848	0.637105	0.09616	0.571963	0.42071	622	16	591.8	6.5	588.1	5.8	95.1447	0.281983	3e-05	0.00028148	5.2e-07	0.007929	8.1e-05	1.4673	3.2e-05	-28.3608	1.13278	6.68	290.344
Z_GJ1_14	11.16	0.000719542	175300	861	0.0326264	10.2575	0.615448	0.06053	0.569965	0.7876	0.628492	0.09749	0.615448	0.022758	621	24	599.7	7.3	589.8	5.6	96.57	0.281977	3.9e-05	0.0002782	5.3e-07	0.0083	0.00011	1.4672	7e-05	-28.5729	1.43675	8.2	303.347
Z_LH94_15_1	39.314	0	382000	277	0.667557	3.04229	0.593246	0.11157	0.17926	5.075	0.600985	0.3287	0.593246	0.8263	1823.9	6.6	1832	19	1831.6	10	100.444	0.281772	1.8e-05	0.00074	4.5e-06	0.02339	0.00012	1.46731	3.7e-05	-35.8223	0.747927	9.04	853.298
Z_LH94_15_2	39.281	0	352000	253	0.665336	3.04321	0.684723	0.11203	0.223155	5.077	0.679535	0.3286	0.684723	0.85439	1831.3	8.1	1831	22	1831.6	12	99.9836	0.281723	2.5e-05	0.000722	1.4e-05	0.02297	0.00052	1.46733	3.2e-05	-37.555	0.968909	9.46	837.81
Z_LH94_15_3	27.785	0.000426188	407000	323	0.666933	3.02572	0.559758	0.11196	0.214362	5.077	0.571203	0.3305	0.559758	0.6346	1830.3	7.8	1840.7	18	1832.1	9.8	100.568	0.281761	3.1e-05	0.0007175	4.4e-06	0.02305	0.00015	1.46732	4.7e-05	-36.2113	1.16696	10.38	840.48
Z_LH94_15_4	22.245	0	471000	385	0.666223	3.046	0.563509	0.1122	0.227273	5.074	0.571541	0.3283	0.563509	0.56677	1834.2	8.2	1829.9	18	1831.7	9.7	99.7656	0.281741	1.8e-05	0.0006935	8.5e-06	0.0223	0.00023	1.46733	3.2e-05	-36.9185	0.747988	12.22	813.109
Z_LH94_15_5	19.203	0	499000	448	0.656599	3.046	0.578739	0.11174	0.232683	5.076	0.561466	0.3283	0.578739	0.59671	1826.8	8.4	1830	18	1832	9.6	100.175	0.281743	2.9e-05	0.0006867	9.9e-06	0.02224	0.00026	1.46729	2.8e-05	-36.8478	1.10036	12.3	810.747
Z_LH94_15_6	10.861	0	352000	312	0.671592	3.04229	0.806206	0.112	0.491071	5.074	0.679937	0.3287	0.806206	0.57311	1830	19	1832	26	1831.6	12	100.109	0.281774	4.2e-05	0.0006936	2.4e-06	0.02279	0.00024	1.46728	4.8e-05	-35.7515	1.54048	12.65	830.44
Z_LH94_15_7	29.755	0.000159178	300000	285	0.664452	3.03214	0.576107	0.11208	0.249822	5.079	0.590667	0.3298	0.576107	0.58139	1832.2	9.1	1837.4	19	1832.4	10	100.284	0.281728	2.5e-05	0.0006318	1.9e-06	0.01994	0.00018	1.4673	2.8e-05	-37.3782	0.968894	11.53	727.471
Z_LH94_15_8	39.276	0.00110599	292000	272	0.667646	3.03767	0.561968	0.11167	0.232829	5.073	0.571654	0.3292	0.561968	0.50365	1825.5	8.4	1834.5	18	1831.4	9.7	100.493	0.281743	2.2e-05	0.0007042	2.5e-06	0.02227	0.00019	1.46728	2.9e-05	-36.8478	0.872378	9.94	812.426
Z_LH94_15_9	39.258	0	280000	289	0.666889	3.05437	0.58033	0.11213	0.205119	5.073	0.58151	0.3274	0.58033	0.73251	1834.2	7.1	1825.7	18	1831.4	10	99.5366	0.281695	1.9e-05	0.0006861	1.8e-06	0.02145	0.00015	1.46736	3.1e-05	-38.5452	0.778618	9.91	782.789
Z_LH94_15_10	39.318	0	264000	273	0.666223	3.02755	0.60551	0.11192	0.263581	5.08	0.620079	0.3303	0.60551	0.52417	1829.4	9.6	1840	19	1832.4	11	100.579	0.281716	1.9e-05	0.0006344	4e-06	0.01959	0.00027	1.46736	2.9e-05	-37.8026	0.778575	10.3	715.186
Z_LH94_15_11	39.304	0	241000	273	0.627353	3.046	0.700579	0.11208	0.240899	5.069	0.700335	0.3283	0.700579	0.85231	1833.6	9.1	1832	24	1830.3	12	99.9127	0.281716	2e-05	0.000391	1.1e-05	0.0117	0.00029	1.46732	2.7e-05	-37.8026	0.809518	11.41	427.569
Z_LH94_15_12	36.183	0.000112753	307000	358	0.671592	3.02847	0.696547	0.11165	0.223914	5.083	0.708243	0.3302	0.696548	0.89324	1825.2	8.1	1839	23	1832.6	12	100.756	0.281726	1.9e-05	0.0004655	2.1e-06	0.01401	0.0002	1.46733	2.7e-05	-37.4489	0.778554	11.62	511.891
Z_LH94_15_13	36.087	0	201000	256	0.667022	3.0581	0.59633	0.11181	0.201234	5.069	0.61156	0.327	0.59633	0.79026	1827.9	7.3	1823.5	19	1830.7	10	99.7593	0.281756	2.2e-05	0.0004569	1.7e-06	0.01386	0.00017	1.46736	2.3e-05	-36.3881	0.872346	9.92	506.282
Z_LH94_15_14	24.595	0	302000	408	0.667245	3.01932	0.588768	0.11179	0.219161	5.08	0.570866	0.3312	0.588768	0.73471	1827.6	7.9	1844	19	1832.6	9.8	100.897	0.281707	1.8e-05	0.0004733	1.8e-06	0.01472	0.00021	1.46736	3.3e-05	-38.1208	0.748053	13.06	537.274
Z_Plesovice_1	39.234	0	96000	426	0.0754318	18.6116	0.567653	0.05304	0.414781	0.3974	0.654253	0.05373	0.567653	0.26748	327	19	337.3	3.7	339.7	3.8	103.15	0.282485	1.6e-05	8.54e-05	1.3e-06	0.00371	0.0001	1.46728	2.7e-05	-10.6088	0.687112	11.31	134.215
Z_Plesovice_2	29.34	0	95000	429	0.0764468	18.6324	0.58692	0.05326	0.535111	0.3977	0.804627	0.05367	0.58692	0.53353	336	24	337	3.9	339.9	4.6	100.298	0.282487	1.3e-05	8.131e-05	4.9e-07	0.003538	4.9e-05	1.46729	2.6e-05	-10.538	0.602573	12.78	127.988
Z_Plesovice_3	31.27	0.00118758	107300	514	0.0761847	18.522	0.592702	0.05364	0.494034	0.3941	0.748541	0.05399	0.592702	0.45308	352	23	339	3.9	337.3	4.3	96.3068	0.282478	1.8e-05	8.215e-05	7.5e-07	0.003521	3e-05	1.46727	4.1e-05	-10.8563	0.746564	11.57	127.417
Z_Plesovice_4	27.075	0	103200	529	0.0837731	18.9753	0.616698	0.0538	0.45539	0.3926	0.713194	0.0527	0.616698	0.45396	359	21	331	4	336.2	4.1	92.2006	0.282483	2.1e-05	7.952e-05	7.7e-07	0.003371	2.4e-05	1.46726	3.4e-05	-10.6795	0.839027	10.45	122.019
Z_Plesovice_5	27.561	0	115500	622	0.0805802	18.7653	0.619253	0.05312	0.414157	0.3928	0.738289	0.05329	0.619253	0.3834	332	18	334.7	4	336.4	4.2	100.813	0.282508	1.9e-05	8.098e-05	8.4e-07	0.0036	0.0001	1.46725	3.9e-05	-9.79543	0.776937	12.45	130.169
Z_Plesovice_6	26.717	0	124900	723	0.0813074	18.8076	0.573632	0.05355	0.47619	0.3868	0.633402	0.05317	0.573632	0.20694	349	22	333.9	3.8	332	3.6	95.6734	0.282473	1.9e-05	8.764e-05	9.3e-07	0.003802	7.5e-05	1.46732	2.9e-05	-11.0331	0.777009	11.46	137.548
Z_Plesovice_7	26.304	0	119900	695	0.080186	18.7512	0.600037	0.05337	0.449691	0.3887	0.668896	0.05333	0.600038	0.35904	341	20	334.9	3.9	333.4	3.8	98.2111	0.282459	1.5e-05	8.53e-05	1.5e-06	0.003707	4.3e-05	1.46729	3.9e-05	-11.5282	0.658275	11.91	134.105
Z_Plesovice_8	32.913	0	113400	723	0.0698178	18.7723	0.600713	0.05349	0.420639	0.3963	0.693919	0.05327	0.600713	0.47042	347	19	334.6	3.9	338.9	4	96.4265	0.282503	1.4e-05	8.72e-05	1.4e-06	0.003691	4.5e-05	1.46724	3.5e-05	-9.97224	0.630001	11.04	133.607
Z_Plesovice_9	29.315	0	117100	839	0.117385	18.9072	0.567215	0.05349	0.429987	0.3881	0.66993	0.05289	0.567215	0.34534	346	20	332.3	3.6	332.9	3.8	96.0405	0.282499	1.9e-05	8.89e-05	1.5e-06	0.003802	5.6e-05	1.46726	3.3e-05	-10.1137	0.776956	11.48	137.592
Z_Plesovice_10	29.134	0.00396343	118500	847	0.114181	18.7723	0.581941	0.05342	0.496069	0.3908	0.716479	0.05327	0.581941	0.30845	343	22	334.6	3.8	334.9	4.1	97.551	0.282468	2.1e-05	9.08e-05	1.8e-06	0.00388	4.1e-05	1.46718	3.2e-05	-11.2099	0.839062	11.31	140.418
Z_Plesovice_11	20.19	0	138900	1153	0.0865576	18.7582	0.619021	0.05299	0.518966	0.3983	0.728094	0.05331	0.619021	0.3902	325	24	334.8	4	340.3	4.2	103.015	0.282517	1.9e-05	9.69e-05	1.3e-06	0.004288	2.3e-05	1.46728	4.6e-05	-9.47716	0.776919	13.03	155.061
1 Percentage of the common Pb on the 206Pb calculated using the Hg-interference- and background-corrected 204Pb signal and common Pb model composition of Stacey and Kramers (1975).
2 Data not corrected for common-Pb.
3 207Pb/235U = 207Pb/206Pb/(238U/206Pb*1/137.88).
4 Correlation coefficient between errors of 206Pb/238U and 207Pb/235U.
5 Degree of concordance = (206Pb/238U age / 207Pb/206Pb age) × 100.
6 (176Hf/177Hf)measured: ratio corrected from Yb- and Lu-interference.
7 Calculated using Bouvier et al., (2008) model values: 176Hf/177Hf=0.282785±11 and 176Lu/177Hf=0.0336±1.
8 Interference correction expressed in εHf units calcualted as follow: [((176Yb/177Hf)+(176Lu/177Hf))/0.282785]· 104.

## Sheet: RM O SIMS analyses
O Zircon Reference Material Analyses (Vezinet al., 2019 - Geology)
Spot Name	18O/16O	1σ (%) inter-session	δ18O (VSMOW)	2σ (‰)
S0022 = TEM2
P1725_M1483_IP18009_18O16O_test1_S0022@4	0.00202169	0.00930362	8.22247	0.186072		8.28	Weighted Mean
P1725_M1483_IP18009_18O16O_test1_S0022@5	0.00202187	0.0109499	8.31301	0.218999		0.04	2-standard-error (i.e. 2-standard-deviation of the mean)
P1725_M1483_IP18009_18O16O_test1_S0022@6	0.00202144	0.0107698	8.09792	0.215396		0.88	MSWD
P1725_M1483_IP18009_18O16O_test1_S0022@7	0.0020217	0.00853114	8.22786	0.170623		0	Rejected analyses
P1725_M1483_IP18009_18O16O_test1_S0022@8	0.00202183	0.0100816	8.29586	0.201632		0.64	Probability of fit
P1725_M1483_IP18009_18O16O_test1_S0022@9	0.00202187	0.0117647	8.31293	0.235294
P1725_M1483_IP18009_18O16O_test1_S0022@10	0.00202187	0.00902746	8.31397	0.180549
P1725_M1483_IP18009_18O16O_test1_S0022@11	0.00202194	0.0101475	8.34738	0.20295
P1725_M1483_IP18009_18O16O_test1_S0022@12	0.00202158	0.00791583	8.16982	0.158317
P1725_M1483_IP18009_18O16O_S0022@11	0.00202189	0.0078469	8.32476	0.156938
P1725_M1483_IP18009_18O16O_S0022@12	0.00202208	0.010275	8.41632	0.2055
P1725_M1483_IP18009_18O16O_S0022@13	0.00202152	0.0105894	8.13793	0.211788
P1725_M1483_IP18009_18O16O_S0022@14	0.00202168	0.0111486	8.21962	0.222972
P1725_M1483_IP18009_18O16O_S0022@15	0.0020216	0.0131541	8.17778	0.263082
P1725_M1483_IP18009_18O16O_S0022@16	0.00202185	0.00978739	8.30417	0.195748
P1725_M1483_IP18009_18O16O_S0022@17	0.00202167	0.00972911	8.21377	0.194582
P1725_M1483_IP18009_18O16O_S0022@18	0.00202228	0.0102697	8.51695	0.205395
P1725_M1483_IP18009_18O16O_S0022@19	0.00202207	0.0125699	8.4148	0.251398
P1725_M1483_IP18009_18O16O_S0022@20	0.00202164	0.0128198	8.19737	0.256396
P1725_M1483_IP18009_18O16O_S0022@21	0.00202195	0.0113565	8.35134	0.227129
P1725_M1483_IP18009_18O16O_S0022@23	0.0020216	0.00913158	8.1806	0.182632
P1725_M1483_IP18009_18O16O_S0022@24	0.00202202	0.0126975	8.3876	0.25395
P1725_M1483_IP18009_18O16O_S0022@25	0.00202189	0.011038	8.32449	0.22076
P1725_M1483_IP18009_18O16O_S0022@26	0.00202171	0.00781181	8.23395	0.156236
P1725_M1483_IP18009_18O16O_S0022@27	0.00202163	0.0104599	8.19412	0.209197
P1725_M1483_IP18009_18O16O_S0022@28	0.00202193	0.0121623	8.34532	0.243246
P1725_M1483_IP18009_18O16O_S0022@29	0.00202177	0.0103022	8.26447	0.206043
P1725_M1483_IP18009_18O16O_S0022@30	0.00202208	0.011448	8.41926	0.22896

## Sheet: RM trace element
Trace Element NIST+ Zircon Reference Material Analyses (Vezinet al., 2019 - Geology)
	P	Ca	Ti	Mn	Fe	Y	Zr	Nb	Ba	La	Ce	Pr	Nd	Sm	Eu	Gd	Tb	Dy	Ho	Er	Tm	Yb	Lu	Hf	Pb204	Pb208	Th	U
Glass_NIST614 - 1	41.9	94500	3.67	1.04	11.8	0.895	0.81	0.899	3.5	0.78	0.89	0.84	0.875	0.816	0.844	0.88	0.814	0.793	0.811	0.826	0.806	0.801	0.799	0.833	2.77	2.592	0.851	0.946
Glass_NIST614 - 2	45.7	94800	3.69	0.72	15.6	0.9	0.6	0.93	3.55	0.804	0.878	0.828	0.847	0.785	0.866	0.875	0.8	0.839	0.824	0.777	0.757	0.939	0.79	0.783	2.38	2.608	0.806	0.874
Glass_NIST614 - 3	42.2	95400	3.66	1.17	13.3	0.878	0.3	0.902	3.67	0.758	0.855	0.848	0.876	0.877	0.794	0.857	0.814	0.825	0.84	0.835	0.788	0.851	0.816	0.819	1.78	2.557	0.828	0.912
Glass_NIST614 - 4	41	95300	4.01	2.67	18.2	0.858	0.56	0.898	3.67	0.774	0.876	0.823	0.883	0.885	0.869	0.794	0.85	0.822	0.844	0.85	0.802	0.835	0.808	0.797	2.15	2.568	0.833	0.916
Glass_NIST614 - 5	41.5	95400	3.48	1.1	16.6	0.87	0.57	0.899	3.64	0.791	0.856	0.821	0.843	0.869	0.84	0.838	0.849	0.918	0.829	0.827	0.771	0.79	0.802	0.794	2.5	2.515	0.819	0.91
Glass_NIST614 - 6	42	95200	4.22	2.29	13.5	0.889	0.05	0.904	3.6	0.778	0.863	0.835	0.82	0.862	0.858	0.866	0.854	0.88	0.841	0.787	0.794	0.848	0.82	0.84	2.05	2.54	0.841	0.932
Glass_NIST614 - 7	43.6	95200	3.76	2.23	16.9	0.882	0.39	0.922	3.78	0.802	0.878	0.869	0.837	0.785	0.879	0.775	0.844	0.82	0.841	0.832	0.787	0.794	0.835	0.785	2.21	2.579	0.833	0.919
Glass_NIST614 - 8	42.3	94900	3.26	2.75	15.4	0.851	0.21	0.901	3.66	0.764	0.884	0.862	0.861	0.868	0.84	0.824	0.822	0.817	0.84	0.818	0.793	0.805	0.818	0.811	2.69	2.602	0.824	0.908
Glass_NIST614 - 9	43.4	95600	3.59	2.13	17.8	0.894	0.65	0.893	3.56	0.775	0.858	0.821	0.804	0.879	0.87	0.897	0.826	0.78	0.829	0.821	0.8	0.797	0.796	0.788	2.45	2.625	0.82	0.936
Glass_NIST614 - 10	41.6	95000	3.36	0.94	17.4	0.869	0.59	0.919	3.59	0.764	0.874	0.804	0.82	0.901	0.818	0.88	0.827	0.828	0.824	0.847	0.799	0.829	0.81	0.787	2.41	2.534	0.817	0.928
Mean	42.52	95130	3.67	1.704	15.65	0.8786	0.473	0.9067	3.622	0.779	0.8712	0.8351	0.8466	0.8527	0.8478	0.8486	0.83	0.8322	0.8323	0.822	0.7897	0.8289	0.8094	0.8037	2.339	2.572	0.8272	0.9181
mean 2S.E. (abs)	3.94	1240	0.606	0.651	3.65	0.0409	0.26	0.0403	0.199	0.0323	0.0335	0.0315	0.0712	0.0811	0.0409	0.0817	0.0317	0.0643	0.0317	0.0531	0.0295	0.0649	0.0336	0.063	0.645	0.071	0.0285	0.03
mean 2S.E. (%)	9.26623	1.30348	16.5123	38.2042	23.3227	4.65513	54.9683	4.44469	5.4942	4.14634	3.84527	3.772	8.41011	9.51097	4.82425	9.62762	3.81928	7.72651	3.80872	6.45985	3.7356	7.82965	4.15122	7.83875	27.5759	2.7605	3.44536	3.26762
mean L.O.D.	3.01	133	0.723	1.119	6.3	0.0208	0.439	0.00711	0.0607	0.005	0.0064	0.01653	0.0313	0.0328	0.00695	0.0445	0.00406	0.0176	0.01485	0.0178	0.00367	0.0173	0.00624	0.0522	1.04	0.0144	0.00353	0.0026
Reference value	11.4		3.61	1.42	18.8	0.79	0.848	0.824	3.2	0.72	0.813	0.768	0.752	0.754	0.77	0.763	0.739	0.746	0.749	0.74	0.732	0.777	0.732	0.711			0.748	0.823
Uncertainty in the reference value (95% confidence level)	3.9		0.25	0.07	6	0.032	0.028	0.03	0.09	0.013	0.025	0.015	0.014	0.013	0.016	0.021	0.02	0.022	0.015	0.017	0.02	0.021	0.018	0.022			0.006	0.002
Zircon_91500 - 1	30.6	< L.O.D.	4.73	< L.O.D.	< L.O.D.	117.7	442000	0.26	0.07	0.0087	2.206	0.0131	0.169	0.397	0.209	1.951	0.708	9.48	3.967	21.55	5.33	56.2	11.31	4870	< L.O.D.	2.593	24.31	69
Zircon_91500 - 2	31.1	< L.O.D.	4.73	< L.O.D.	< L.O.D.	117.7	440000	0.046	0.075	0.0051	2.22	0.0152	0.176	0.349	0.201	1.89	0.7	9.37	3.887	21.25	5.26	55	11.14	4790	< L.O.D.	2.51	24.21	67.4
Zircon_91500 - 3	30.3	< L.O.D.	4.88	< L.O.D.	< L.O.D.	122.1	449000	0.023	0.083	0.0071	2.292	0.0163	0.212	0.368	0.208	1.89	0.709	9.46	3.966	21.83	5.36	55.7	11.2	4776	< L.O.D.	2.553	24.34	67.5
Zircon_91500 - 4	31.2	< L.O.D.	5.11	< L.O.D.	< L.O.D.	121.9	446000	0.15	0.104	0.0081	2.264	0.015	0.182	0.356	0.196	1.853	0.722	9.7	4.047	22.13	5.4	56.4	11.46	4765	0.5	2.53	24.43	67.3
Zircon_91500 - 5	29	< L.O.D.	4.77	< L.O.D.	< L.O.D.	122.5	447200	0.3	0.084	0.0079	2.309	0.0135	0.197	0.421	0.213	1.92	0.726	9.77	4.05	21.95	5.42	57.1	11.59	4772	0.2	2.598	24.74	68.6
Zircon_91500 - 6	30.3	< L.O.D.	4.99	0.84	< L.O.D.	121.9	446000	0.27	0.109	0.0085	2.277	0.0134	0.186	0.373	0.202	1.972	0.72	9.73	4.05	22.25	5.45	56.8	11.64	4860	0.4	2.573	24.87	69
Zircon_91500 - 7	30.5	< L.O.D.	5	0.67	4.4	124	447500	0.27	0.081	0.0066	2.326	0.0156	0.199	0.371	0.202	2.018	0.746	9.81	4.149	22.53	5.46	57.2	11.74	4841	< L.O.D.	2.7	25.43	69.9
Zircon_91500 - 8	30.1	< L.O.D.	5.16	< L.O.D.	< L.O.D.	124.5	452000	0.3	0.077	0.0091	2.323	0.0148	0.186	0.414	0.206	1.97	0.756	9.85	4.1	22.46	5.5	57.5	11.67	4840	0.1	2.66	25.29	69.9
Zircon_91500 - 9	30.8	< L.O.D.	4.93	< L.O.D.	< L.O.D.	123.2	448000	0.28	0.049	0.0094	2.311	0.0156	0.168	0.387	0.193	1.97	0.721	9.89	4.106	22.14	5.43	56.9	11.58	4778	1.5	2.556	25.14	69.2
Zircon_91500 - 10	31	< L.O.D.	4.8	< L.O.D.	< L.O.D.	123.9	456000	0.31	0.068	0.0095	2.278	0.0165	0.215	0.398	0.197	1.951	0.765	9.82	4.089	22.41	5.54	57.6	11.71	4880	0.5	2.617	25.29	69.5
Mean	30.49		4.91	0.755		121.94	447370	0.2209	0.08	0.008	2.2806	0.0149	0.189	0.3834	0.2027	1.9385	0.7273	9.688	4.0411	22.05	5.415	56.64	11.504	4817.2	0.04	2.589	24.805	68.73
mean 2S.E. (abs)	2.12		0.485	0.355		2.46	10310	0.1379	0.0254	0.0025	0.0605	0.00325	0.0269	0.0434	0.0166	0.0986	0.0265	0.271	0.0954	0.497	0.134	1.25	0.227	99.9	1.53	0.054	0.496	1.41
mean 2S.E. (%)	6.9531		9.8778	47.0199		2.01739	2.30458	62.4264	31.75	31.25	2.65281	21.8121	14.2328	11.3198	8.18944	5.08641	3.64361	2.79727	2.36074	2.25397	2.47461	2.20692	1.97323	2.07382	3825	2.08575	1.9996	2.05151
mean L.O.D.	1.89		0.525	0.635		0.01266	0.306	0.0052	0.0367	0.00352	0.00355	0.00279	0.0193	0.0212	0.00508	0.0262	0.00731	0.01296	0.00278	0.0127	0.0025	0.0115	0.00411	0.0223	0.593	0.0157	0.002126	0.001561
Reference value	24		6					0.79	0.06	0.006	2.6	0.024	0.24	0.5	0.24	2.2	0.86	12	4.8	25	6.9	74	13	5900			30	80
Uncertainty in the reference value (2. S.D.)	2		2					0.14	0.06	0.006	0.6	0.03	0.08	0.16	0.06	0.6	0.14	2	0.8	6	0.8	8	2	600			6	16
L.O.D. : Limit Of Detection
Reference values and associated uncertainty are from: http://georem.mpch-mainz.gwdg.de/

## Sheet: Compilation Zrn O isotope
Compiled zircon O isotope data - Vezinet et al., 2019 (Geology), n=597
Only 95-105% concordance analyses have been included in this compiled dataset. SE: Standard Error (2SE corresponds to ca. 95% confidence level)
Analyses from detrital zircon grains have not been included in this compiled dataset
Only 454 analyses of this compiled dataset match the x- and y-axis range (2500-4000 Ma and 4.50-9.30‰ respectively) of the diagram displayed in Figure 2B of the main manuscript
Reference	Location	Analysis or Sample Name	Nature of the zircon	Age (Ma)	2SE	Concordance (%)	δ18O (‰)	2SE
Albert et al., 2016 (Lithos)	Southern São Francisco craton, Brazil	52_2b	Igneous	2718.16	34.6	96.008	10.8797	0.348351
Albert et al., 2016 (Lithos)	Southern São Francisco craton, Brazil	53_2b	Igneous	2718.16	34.6	96.008	10.8797	0.348351
Albert et al., 2016 (Lithos)	Southern São Francisco craton, Brazil	42_2b	Igneous	2597.93	40	99.3926	7.79251	0.414247
Albert et al., 2016 (Lithos)	Southern São Francisco craton, Brazil	77_2b	Igneous	2706.4	37.72	99.2549	7.03737	0.326309
Albert et al., 2016 (Lithos)	Southern São Francisco craton, Brazil	12a_2	Igneous	2700.53	37.9	96.4176	7.00208	0.18515
Albert et al., 2016 (Lithos)	Southern São Francisco craton, Brazil	59_2b	Igneous	2670.18	41.56	94.7194	6.7302	0.34244
Albert et al., 2016 (Lithos)	Southern São Francisco craton, Brazil	60_2b	Igneous	2670.18	41.56	94.7194	6.7302	0.34244
Albert et al., 2016 (Lithos)	Southern São Francisco craton, Brazil	76_2b	Igneous	2702.58	38.62	100.011	6.59846	0.28715
Albert et al., 2016 (Lithos)	Southern São Francisco craton, Brazil	44_2b	Igneous	2615.34	43.04	99.3692	6.46321	0.373997
Albert et al., 2016 (Lithos)	Southern São Francisco craton, Brazil	48_2b	Igneous	2631.05	45.58	99.1472	6.32504	0.439095
Albert et al., 2016 (Lithos)	Southern São Francisco craton, Brazil	49_2b	Igneous	2631.05	45.58	99.1472	6.32504	0.439095
Albert et al., 2016 (Lithos)	Southern São Francisco craton, Brazil	45_2	Igneous	2706.05	52.04	96.9607	6.29439	0.193949
Albert et al., 2016 (Lithos)	Southern São Francisco craton, Brazil	63_2	Igneous	2715.34	45.1	98.3617	6.09697	0.194345
Albert et al., 2016 (Lithos)	Southern São Francisco craton, Brazil	21_2b	Igneous	2798.18	33.92	97.4621	6.03023	0.208639
Albert et al., 2016 (Lithos)	Southern São Francisco craton, Brazil	48_2	Igneous	2695.44	35.46	99.9852	5.76366	0.147969
Albert et al., 2016 (Lithos)	Southern São Francisco craton, Brazil	50_2	Igneous	2717.1	59.92	98.4143	5.56017	0.149058
Albert et al., 2016 (Lithos)	Southern São Francisco craton, Brazil	51_2	Igneous	2717.1	59.92	98.4143	5.56017	0.149058
Albert et al., 2016 (Lithos)	Southern São Francisco craton, Brazil	78_2b	Igneous	2793.93	40.48	98.6406	5.40619	0.402074
Albert et al., 2016 (Lithos)	Southern São Francisco craton, Brazil	79_2b	Igneous	2776.12	43.28	100.387	5.3363	0.368179
Albert et al., 2016 (Lithos)	Southern São Francisco craton, Brazil	23_2b	Igneous	2818.01	35.54	100.974	5.10716	0.176818
Albert et al., 2016 (Lithos)	Southern São Francisco craton, Brazil	14_2b	Igneous	2782.02	35.04	95.9268	4.90187	0.142589
Albert et al., 2016 (Lithos)	Southern São Francisco craton, Brazil	56_2	Igneous	2793.76	40.44	96.0354	4.88391	0.200837
Albert et al., 2016 (Lithos)	Southern São Francisco craton, Brazil	27_2b	Igneous	2784.29	36.26	99.9712	4.86221	0.150495
Albert et al., 2016 (Lithos)	Southern São Francisco craton, Brazil	28_2b	Igneous	2784.29	36.26	99.9712	4.86221	0.150495
Albert et al., 2016 (Lithos)	Southern São Francisco craton, Brazil	20_2b	Igneous	2798.51	34.78	98.3226	4.72581	0.1818
Albert et al., 2016 (Lithos)	Southern São Francisco craton, Brazil	52_2b	Igneous	2636.1	41.76	98.9799	4.49687	0.325047
Albert et al., 2016 (Lithos)	Southern São Francisco craton, Brazil	53_2b	Igneous	2636.1	41.76	98.9799	3.87311	0.270676
Albert et al., 2016 (Lithos)	Southern São Francisco craton, Brazil	37_2	Igneous	2852.71	52.2	96.0415	3.05904	0.141801
Bowman et al., 2011 (American Journal of Science)	Kapuskasing Uplift (Southern Superior Pce)	K05-32_G59	Metamorphic	2606	10	95	10.2	0.29
Bowman et al., 2011 (American Journal of Science)	Kapuskasing Uplift (Southern Superior Pce)	K05-32_G15	Metamorphic	2640	4	97	10.1	0.56
Bowman et al., 2011 (American Journal of Science)	Kapuskasing Uplift (Southern Superior Pce)	K05-32_G37	Metamorphic	2631	8	101	10.1	0.39
Bowman et al., 2011 (American Journal of Science)	Kapuskasing Uplift (Southern Superior Pce)	K05-32_G9or	Metamorphic	2601	8	95	10	0.23
Bowman et al., 2011 (American Journal of Science)	Kapuskasing Uplift (Southern Superior Pce)	K05-32_G10or	Metamorphic	2594	6	100	10	0.33
Bowman et al., 2011 (American Journal of Science)	Kapuskasing Uplift (Southern Superior Pce)	K05-32_G27	Metamorphic	2619	8	97	10	0.45
Bowman et al., 2011 (American Journal of Science)	Kapuskasing Uplift (Southern Superior Pce)	K05-32_G46	Metamorphic	2635	6	99	10	0.36
Bowman et al., 2011 (American Journal of Science)	Kapuskasing Uplift (Southern Superior Pce)	K05-32_G56	Metamorphic	2623	14	95	10	0.45
Bowman et al., 2011 (American Journal of Science)	Kapuskasing Uplift (Southern Superior Pce)	K05-32_G57	Metamorphic	2659	8	95	10	0.29
Bowman et al., 2011 (American Journal of Science)	Kapuskasing Uplift (Southern Superior Pce)	K05-32_G63	Metamorphic	2620	8	97	9.9	0.28
Bowman et al., 2011 (American Journal of Science)	Kapuskasing Uplift (Southern Superior Pce)	K05-32_G6tip	Metamorphic	2512	8	100	9.6	0.43
Bowman et al., 2011 (American Journal of Science)	Kapuskasing Uplift (Southern Superior Pce)	K05-32_G53	Metamorphic	2620	10	99	9.6	0.45
Bowman et al., 2011 (American Journal of Science)	Kapuskasing Uplift (Southern Superior Pce)	K05-32_G73	Metamorphic	2583	8	97	9.5	0.52
Bowman et al., 2011 (American Journal of Science)	Kapuskasing Uplift (Southern Superior Pce)	K05-32_G61	Metamorphic	2617	16	100	9.4	0.29
Bowman et al., 2011 (American Journal of Science)	Kapuskasing Uplift (Southern Superior Pce)	K05-32_G34	Metamorphic	2615	10	101	9.3	0.49
Bowman et al., 2011 (American Journal of Science)	Kapuskasing Uplift (Southern Superior Pce)	K05-32_G43	Metamorphic	2623	6	99	9.3	0.39
Bowman et al., 2011 (American Journal of Science)	Kapuskasing Uplift (Southern Superior Pce)	K05-32_G3.5or	Metamorphic	2626	8	100	9.2	0.54
Bowman et al., 2011 (American Journal of Science)	Kapuskasing Uplift (Southern Superior Pce)	K05-32_G3.7or	Metamorphic	2632	10	96	9.2	0.33
Bowman et al., 2011 (American Journal of Science)	Kapuskasing Uplift (Southern Superior Pce)	K05-32_G39ir	Metamorphic	2620	12	100	9.1	0.39
Bowman et al., 2011 (American Journal of Science)	Kapuskasing Uplift (Southern Superior Pce)	K05-32_G78or	Metamorphic	2633	8	95	9.1	0.42
Bowman et al., 2011 (American Journal of Science)	Kapuskasing Uplift (Southern Superior Pce)	K05-32_G31	Metamorphic	2705	16	101	9.1	0.49
Bowman et al., 2011 (American Journal of Science)	Kapuskasing Uplift (Southern Superior Pce)	K05-32_G4or	Metamorphic	2623	8	100	9	0.19
Bowman et al., 2011 (American Journal of Science)	Kapuskasing Uplift (Southern Superior Pce)	K05-32_G5or	Metamorphic	2627	8	96	9	0.19
Bowman et al., 2011 (American Journal of Science)	Kapuskasing Uplift (Southern Superior Pce)	K05-32_G77or	Metamorphic	2585	10	97	9	0.37
Bowman et al., 2011 (American Journal of Science)	Kapuskasing Uplift (Southern Superior Pce)	K05-32_G3ir	Metamorphic	2608	8	99	8.9	0.54
Bowman et al., 2011 (American Journal of Science)	Kapuskasing Uplift (Southern Superior Pce)	K05-32_G3mor	Metamorphic	2611	8	100	8.8	0.54
Bowman et al., 2011 (American Journal of Science)	Kapuskasing Uplift (Southern Superior Pce)	K05-32_G4mr	Metamorphic	2628	8	99	8.8	0.19
Bowman et al., 2011 (American Journal of Science)	Kapuskasing Uplift (Southern Superior Pce)	K05-32_G6or	Metamorphic	2622	10	100	8.8	0.59
Bowman et al., 2011 (American Journal of Science)	Kapuskasing Uplift (Southern Superior Pce)	K05-14_G12	Metamorphic	2624	11	99	8.7	0.18
Bowman et al., 2011 (American Journal of Science)	Kapuskasing Uplift (Southern Superior Pce)	K05-32_G2	Metamorphic	2625	6	98	8.7	0.29
Bowman et al., 2011 (American Journal of Science)	Kapuskasing Uplift (Southern Superior Pce)	K05-32_G4ir	Metamorphic	2628	8	101	8.7	0.19
Bowman et al., 2011 (American Journal of Science)	Kapuskasing Uplift (Southern Superior Pce)	K05-32_G9ir	Metamorphic	2628	8	97	8.7	0.23
Bowman et al., 2011 (American Journal of Science)	Kapuskasing Uplift (Southern Superior Pce)	K05-32_G35	Metamorphic	2612	10	99	8.7	0.49
Bowman et al., 2011 (American Journal of Science)	Kapuskasing Uplift (Southern Superior Pce)	K05-32_G71	Metamorphic	2618	10	95	8.7	0.33
Bowman et al., 2011 (American Journal of Science)	Kapuskasing Uplift (Southern Superior Pce)	K05-32_G3.5mc	Metamorphic	2644	20	99	8.7	0.54
Bowman et al., 2011 (American Journal of Science)	Kapuskasing Uplift (Southern Superior Pce)	K05-32_G8or	Metamorphic	2630	8	96	8.6	0.23
Bowman et al., 2011 (American Journal of Science)	Kapuskasing Uplift (Southern Superior Pce)	K05-32_G39or	Metamorphic	2620	10	97	8.6	0.39
Bowman et al., 2011 (American Journal of Science)	Kapuskasing Uplift (Southern Superior Pce)	K05-21A_G3	Metamorphic	2629	7	97	8.5	0.39
Bowman et al., 2011 (American Journal of Science)	Kapuskasing Uplift (Southern Superior Pce)	K05-32_G50	Metamorphic	2619	10	98	8.5	0.36
Bowman et al., 2011 (American Journal of Science)	Kapuskasing Uplift (Southern Superior Pce)	K05-32_G3.2ic	Metamorphic	2668	18	98	8.5	0.54
Bowman et al., 2011 (American Journal of Science)	Kapuskasing Uplift (Southern Superior Pce)	K05-21A_G2	Metamorphic	2631	6	101	8.1	0.39
Bowman et al., 2011 (American Journal of Science)	Kapuskasing Uplift (Southern Superior Pce)	K05-32_G6.5moc	Metamorphic	2661	10	97	8.1	0.33
Bowman et al., 2011 (American Journal of Science)	Kapuskasing Uplift (Southern Superior Pce)	K05-21A_G1	Metamorphic	2621	5	97	8	0.39
Bowman et al., 2011 (American Journal of Science)	Kapuskasing Uplift (Southern Superior Pce)	K05-21A_G11or	Metamorphic	2629	6	100	7.7	0.39
Bowman et al., 2011 (American Journal of Science)	Kapuskasing Uplift (Southern Superior Pce)	K05-21A_G12	Metamorphic	2616	8	98	7.7	0.39
Bowman et al., 2011 (American Journal of Science)	Kapuskasing Uplift (Southern Superior Pce)	K05-21A_G21	Metamorphic	2625	7	98	7.7	0.38
Bowman et al., 2011 (American Journal of Science)	Kapuskasing Uplift (Southern Superior Pce)	K05-21A_G17	Metamorphic	2631	6	97	7.6	0.28
Bowman et al., 2011 (American Journal of Science)	Kapuskasing Uplift (Southern Superior Pce)	K05-21A_G22	Metamorphic	2622	6	100	7.6	0.38
Bowman et al., 2011 (American Journal of Science)	Kapuskasing Uplift (Southern Superior Pce)	K05-32_G6.7oc	Metamorphic	2666	12	101	7.6	0.43
Bowman et al., 2011 (American Journal of Science)	Kapuskasing Uplift (Southern Superior Pce)	K05-21A_G14	Metamorphic	2625	7	97	7.5	0.28
Bowman et al., 2011 (American Journal of Science)	Kapuskasing Uplift (Southern Superior Pce)	K05-21A_G20	Metamorphic	2624	6	97	7.5	0.38
Bowman et al., 2011 (American Journal of Science)	Kapuskasing Uplift (Southern Superior Pce)	K05-32_G5	Metamorphic	2641	28	96	7.4	0.19
Bowman et al., 2011 (American Journal of Science)	Kapuskasing Uplift (Southern Superior Pce)	K05-32_G16ic	Metamorphic	2678	30	101	7.2	0.59
Bowman et al., 2011 (American Journal of Science)	Kapuskasing Uplift (Southern Superior Pce)	K05-32_G3.6oc	Metamorphic	2694	32	102	6.6	0.44
Claesson et al., 2016 (Precambrian Research)	Ukrainian Shield	C13-2-44	Igneous	2712.06	18.1488	97.579	8.9154	0.166258
Claesson et al., 2016 (Precambrian Research)	Ukrainian Shield	C13-2-38	Igneous	2698.44	29.1895	96.892	8.88971	0.163377
Claesson et al., 2016 (Precambrian Research)	Ukrainian Shield	C13-2-40	Igneous	2763.76	16.3718	98.1821	8.87099	0.166396
Claesson et al., 2016 (Precambrian Research)	Ukrainian Shield	C13-2-36	Igneous	2774.67	13.4309	99.8733	8.82858	0.162084
Claesson et al., 2016 (Precambrian Research)	Ukrainian Shield	C13-2-33	Igneous	2738.04	12.0531	98.8964	8.78971	0.165042
Claesson et al., 2016 (Precambrian Research)	Ukrainian Shield	C13-2-41	Igneous	2744.73	25.3044	99.0426	8.75686	0.172702
Claesson et al., 2016 (Precambrian Research)	Ukrainian Shield	C13-2-35	Igneous	2558.24	17.5555	95.3395	8.71126	0.155166
Claesson et al., 2016 (Precambrian Research)	Ukrainian Shield	C13-3B-12	Igneous	2605.96	42.8597	101.019	6.92841	0.160733
Claesson et al., 2016 (Precambrian Research)	Ukrainian Shield	C13-3B-15	Igneous	2702.09	17.4012	96.3326	6.77406	0.159949
Claesson et al., 2016 (Precambrian Research)	Ukrainian Shield	C13-3B-05	Igneous	2565.41	27.9056	96.9296	6.21279	0.156743
Claesson et al., 2016 (Precambrian Research)	Ukrainian Shield	C13-3A-19	Igneous	2751.27	30.0718	100.718	6.1699	0.154488
Claesson et al., 2016 (Precambrian Research)	Ukrainian Shield	C13-3A-28	Igneous	2677.46	25.0554	95.0916	5.76643	0.159974
Claesson et al., 2016 (Precambrian Research)	Ukrainian Shield	C13-5-04	Igneous	2859.58	10.5159	98.2578	5.58876	0.157654
Claesson et al., 2016 (Precambrian Research)	Ukrainian Shield	C13-1-53	Igneous	3231.9	9.2009	98.2219	5.18642	0.162733
Claesson et al., 2016 (Precambrian Research)	Ukrainian Shield	C13-1-55	Igneous	2545.92	19.6788	96.1629	5.07961	0.167631
Claesson et al., 2016 (Precambrian Research)	Ukrainian Shield	C13-1-52	Igneous	2657.94	22.7674	97.6611	4.63905	0.162711
Claesson et al., 2016 (Precambrian Research)	Ukrainian Shield	C13-1-50	Igneous	2571.31	25.0778	95.3828	4.48191	0.174716
Ge et al., 2014 (Precambrian Research)	Korla Complex (Tarim craton)	12K100-2.2_c	Igneous	2740	19	97	9.49	0.23
Ge et al., 2014 (Precambrian Research)	Korla Complex (Tarim craton)	12K100-8.1_c	Igneous	2740	19	96	8.81	0.17
Ge et al., 2014 (Precambrian Research)	Korla Complex (Tarim craton)	12K82-17.1_c	Igneous	2714	10	97	8.8	0.22
Ge et al., 2014 (Precambrian Research)	Korla Complex (Tarim craton)	12K82-14.1_c	Igneous	2714	10	98	8.49	0.48
Ge et al., 2014 (Precambrian Research)	Korla Complex (Tarim craton)	12K82-5.1_c	Igneous	2714	10	97	8.3	0.36
Ge et al., 2014 (Precambrian Research)	Korla Complex (Tarim craton)	12K82-18.1_c	Igneous	2714	10	96	8.1	0.41
Ge et al., 2014 (Precambrian Research)	Korla Complex (Tarim craton)	12K100-21.1_c	Igneous	2740	19	96	8.08	0.34
Ge et al., 2014 (Precambrian Research)	Korla Complex (Tarim craton)	12K82-8.1_c	Igneous	2714	10	97	7.96	0.53
Ge et al., 2014 (Precambrian Research)	Korla Complex (Tarim craton)	12K82-12.1_c	Igneous	2714	10	101	7.9	0.42
Ge et al., 2014 (Precambrian Research)	Korla Complex (Tarim craton)	12K82-11.1_c	Igneous	2714	10	97	7.74	0.39
Ge et al., 2014 (Precambrian Research)	Korla Complex (Tarim craton)	12K82-16.1_c	Igneous	2714	10	103	7.74	0.44
Ge et al., 2014 (Precambrian Research)	Korla Complex (Tarim craton)	12K82-4.1_c	Igneous	2714	10	98	7.7	0.22
Ge et al., 2014 (Precambrian Research)	Korla Complex (Tarim craton)	12K82-1.1_c	Igneous	2714	10	102	7.66	0.22
Ge et al., 2014 (Precambrian Research)	Korla Complex (Tarim craton)	12K82-15.1_c	Igneous	2714	10	100	7.13	0.17
Ge et al., 2014 (Precambrian Research)	Korla Complex (Tarim craton)	12K82-7.1_c	Igneous	2714	10	100	6.81	0.3
Ge et al., 2014 (Precambrian Research)	Korla Complex (Tarim craton)	12K82-10.1_c	Igneous	2714	10	101	6.8	0.8
Guo et al., 2014 (Precambrian Research)	Kongling Terrain (Yangtze craton)	c-KH112-9	Igneous	3275.92	42.13	95.9765	7.19008	0.23108
Guo et al., 2014 (Precambrian Research)	Kongling Terrain (Yangtze craton)	c-KH112-60	Igneous	3389.82	62.35	99.8439	6.79139	0.227126
Guo et al., 2014 (Precambrian Research)	Kongling Terrain (Yangtze craton)	c-KH110-26	Igneous	2823.76	49.535	100.002	6.57895	0.295044
Guo et al., 2014 (Precambrian Research)	Kongling Terrain (Yangtze craton)	c-KH112-48	Igneous	3352.78	79.63	101.63	6.4876	0.186325
Guo et al., 2014 (Precambrian Research)	Kongling Terrain (Yangtze craton)	c-KH110-44	Igneous	2910.18	38.89	99.8881	6.43519	0.355277
Guo et al., 2014 (Precambrian Research)	Kongling Terrain (Yangtze craton)	c-KH110-36	Igneous	3335.49	32.4075	99.9256	6.43429	0.376508
Guo et al., 2014 (Precambrian Research)	Kongling Terrain (Yangtze craton)	c-KH110-42	Igneous	3377.47	38.71	100.297	6.42911	0.332257
Guo et al., 2014 (Precambrian Research)	Kongling Terrain (Yangtze craton)	c-KH112-58	Igneous	3435.5	72.225	101.359	6.42563	0.305223
Guo et al., 2014 (Precambrian Research)	Kongling Terrain (Yangtze craton)	c-KH112-59	Igneous	2910.8	65.44	98.3345	6.41283	0.294891
Guo et al., 2014 (Precambrian Research)	Kongling Terrain (Yangtze craton)	c-KH112-64	Igneous	3389.82	62.35	101.887	6.36707	0.163898
Guo et al., 2014 (Precambrian Research)	Kongling Terrain (Yangtze craton)	c-KH112-33	Igneous	3313.27	40.87	95.2819	6.36256	0.0967809
Guo et al., 2014 (Precambrian Research)	Kongling Terrain (Yangtze craton)	c-KH112-50	Igneous	3027.47	40.2775	95.0504	6.34195	0.298711
Guo et al., 2014 (Precambrian Research)	Kongling Terrain (Yangtze craton)	c-KH112-57	Igneous	3299.07	78.66	100.959	6.29628	0.259369
Guo et al., 2014 (Precambrian Research)	Kongling Terrain (Yangtze craton)	c-KH110-53	Igneous	3309.26	32.5375	101.662	6.28421	0.298343
Guo et al., 2014 (Precambrian Research)	Kongling Terrain (Yangtze craton)	c-KH110-11	Igneous	3323.14	30.555	97.5232	6.25357	0.250734
Guo et al., 2014 (Precambrian Research)	Kongling Terrain (Yangtze craton)	c-KH112-16	Igneous	3316.36	37.0375	102.584	6.22807	0.199445
Guo et al., 2014 (Precambrian Research)	Kongling Terrain (Yangtze craton)	c-KH112-8	Igneous	3376.86	83.955	98.9459	6.20808	0.159163
Guo et al., 2014 (Precambrian Research)	Kongling Terrain (Yangtze craton)	c-KH112-52	Igneous	3332.05	33.64	97.3539	6.13019	0.325106
Guo et al., 2014 (Precambrian Research)	Kongling Terrain (Yangtze craton)	c-KH112-28	Igneous	3447.22	58.805	100.888	6.11644	0.151542
Guo et al., 2014 (Precambrian Research)	Kongling Terrain (Yangtze craton)	c-KH112-14	Igneous	2988.58	87.66	98.2337	6.07349	0.145783
Guo et al., 2014 (Precambrian Research)	Kongling Terrain (Yangtze craton)	c-KH112-2	Igneous	3303.03	37.345	102.904	6.03935	0.21056
Guo et al., 2014 (Precambrian Research)	Kongling Terrain (Yangtze craton)	c-KH112-51	Igneous	3366.35	41.05	96.6061	5.95773	0.48029
Guo et al., 2014 (Precambrian Research)	Kongling Terrain (Yangtze craton)	c-KH112-12	Igneous	3336.11	36.7275	103.809	5.90502	0.192356
Guo et al., 2014 (Precambrian Research)	Kongling Terrain (Yangtze craton)	c-KH110-6	Igneous	3094.75	29.32	96.8461	5.79686	0.268606
Guo et al., 2014 (Precambrian Research)	Kongling Terrain (Yangtze craton)	c-KH110-59	Igneous	3256.47	35.185	99.8932	5.71633	0.311225
Guo et al., 2014 (Precambrian Research)	Kongling Terrain (Yangtze craton)	c-KH112-34	Igneous	3406.48	69.13	100.655	5.70152	0.0956569
Guo et al., 2014 (Precambrian Research)	Kongling Terrain (Yangtze craton)	c-KH110-52	Igneous	3317.59	33.64	99.7029	5.66136	0.324069
Guo et al., 2014 (Precambrian Research)	Kongling Terrain (Yangtze craton)	c-KH112-65	Igneous	3245.36	64.19	99.4823	5.51566	0.287525
Guo et al., 2014 (Precambrian Research)	Kongling Terrain (Yangtze craton)	c-KH112-37	Igneous	3381.17	72.58	97.8972	5.39721	0.0741704
Hammerli et al., 2018 (Geology)	Granulite from the Yilgarn craton	15TKN11-03	Igneous	2545	24	97.7603	8	0.4
Hammerli et al., 2018 (Geology)	Granulite from the Yilgarn craton	15TKN11-06	Igneous	2727	18	98.0198	8	0.5
Hammerli et al., 2018 (Geology)	Granulite from the Yilgarn craton	15TKN11-08	Igneous	2662	22	97.9339	8	0.4
Hammerli et al., 2018 (Geology)	Granulite from the Yilgarn craton	15TKN11-26	Igneous	2760	24	98.442	8	0.5
Hammerli et al., 2018 (Geology)	Granulite from the Yilgarn craton	15TKN11-01	Igneous	2686	32	98.1385	7.9	0.4
Hammerli et al., 2018 (Geology)	Granulite from the Yilgarn craton	15TKN11-09	Igneous	2667	32	100.225	7.9	0.4
Hammerli et al., 2018 (Geology)	Granulite from the Yilgarn craton	15TKN11-13	Igneous	2735	44	98.6106	7.9	0.4
Hammerli et al., 2018 (Geology)	Granulite from the Yilgarn craton	15TKN11-28	Igneous	2726	26	99.1196	7.9	0.4
Hammerli et al., 2018 (Geology)	Granulite from the Yilgarn craton	15TKN11-10	Igneous	2749	38	97.5264	7.8	0.4
Hammerli et al., 2018 (Geology)	Granulite from the Yilgarn craton	15TKN11-20	Igneous	2758	32	97.9695	7.8	0.4
Hammerli et al., 2018 (Geology)	Granulite from the Yilgarn craton	15TKN11-24	Igneous	2651	22	99.3965	7.8	0.5
Hammerli et al., 2018 (Geology)	Granulite from the Yilgarn craton	15TKN11-02	Igneous	2696	12	98.7389	7.7	0.4
Hammerli et al., 2018 (Geology)	Granulite from the Yilgarn craton	15TKN11-11	Igneous	2663	26	97.5967	7.7	0.4
Hammerli et al., 2018 (Geology)	Granulite from the Yilgarn craton	15TKN11-14	Igneous	2760	16	98.3696	7.7	0.4
Hammerli et al., 2018 (Geology)	Granulite from the Yilgarn craton	15TKN11-18	Igneous	2630	22	97.6046	7.7	0.4
Hammerli et al., 2018 (Geology)	Granulite from the Yilgarn craton	15TKN11-27	Igneous	2669	22	97.8269	7.7	0.4
Hammerli et al., 2018 (Geology)	Granulite from the Yilgarn craton	15TKN11-19	Igneous	2742	18	97.6295	7.6	0.4
Hammerli et al., 2018 (Geology)	Granulite from the Yilgarn craton	15TKN11-23B	Igneous	2618	16	96.906	7.6	0.4
Hammerli et al., 2018 (Geology)	Granulite from the Yilgarn craton	15TKN11-07	Igneous	2794	96	97.2083	7.5	0.4
Hammerli et al., 2018 (Geology)	Granulite from the Yilgarn craton	15TKN11-12	Igneous	2619	14	98.74	7.5	0.4
Hammerli et al., 2018 (Geology)	Granulite from the Yilgarn craton	15TKN11-17	Igneous	2621	14	97.1385	7.5	0.4
Hammerli et al., 2018 (Geology)	Granulite from the Yilgarn craton	15TKN11-25	Igneous	2617	14	98.1276	7.5	0.4
Hammerli et al., 2018 (Geology)	Granulite from the Yilgarn craton	15TKN11-05	Igneous	2626	10	99.8477	7.4	0.4
Hammerli et al., 2018 (Geology)	Granulite from the Yilgarn craton	15TKN11-23	Igneous	2623	28	96.8357	7.4	0.4
Hammerli et al., 2018 (Geology)	Granulite from the Yilgarn craton	15TKN11-21	Igneous	2592	16	96.142	7.3	0.4
Hammerli et al., 2018 (Geology)	Granulite from the Yilgarn craton	15TKN11-04	Igneous	2615	12	98.7763	7.2	0.4
Hammerli et al., 2018 (Geology)	Granulite from the Yilgarn craton	15TKN11-15	Igneous	2618	16	96.6387	7.2	0.4
Hammerli et al., 2018 (Geology)	Granulite from the Yilgarn craton	15TKN11-16	Igneous	2682	10	98.7696	7.2	0.4
Hammerli et al., 2018 (Geology)	Granulite from the Yilgarn craton	15TKN11-22	Igneous	2614	38	97.8194	7.2	0.4
Hammerli et al., 2018 (Geology)	Granulite from the Yilgarn craton	TKN49-04	Igneous	2679	6	97.0511	6.3	0.5
Hammerli et al., 2018 (Geology)	Granulite from the Yilgarn craton	TKN49-06	Igneous	2684	6	98.0999	6.3	0.6
Hammerli et al., 2018 (Geology)	Granulite from the Yilgarn craton	TKN49-18	Igneous	2677	6	97.8708	6.2	0.5
Hammerli et al., 2018 (Geology)	Granulite from the Yilgarn craton	TKN49-02	Igneous	2688	6	97.4702	6.1	0.5
Hammerli et al., 2018 (Geology)	Granulite from the Yilgarn craton	TKN49-16	Igneous	2675	8	97.8318	6	0.4
Hammerli et al., 2018 (Geology)	Granulite from the Yilgarn craton	TKN49-20	Igneous	2684	6	97.5782	6	0.5
Hammerli et al., 2018 (Geology)	Granulite from the Yilgarn craton	TKN49-01	Igneous	2680	6	97.2761	5.9	0.5
Hammerli et al., 2018 (Geology)	Granulite from the Yilgarn craton	TKN49-03	Igneous	2688	6	97.6935	5.9	0.5
Hammerli et al., 2018 (Geology)	Granulite from the Yilgarn craton	TKN49-10	Igneous	2687	6	96.7622	5.9	0.5
Hammerli et al., 2018 (Geology)	Granulite from the Yilgarn craton	TKN49-07	Igneous	2677	16	98.2443	5.8	0.5
Hammerli et al., 2018 (Geology)	Granulite from the Yilgarn craton	TKN49-15	Igneous	2668	8	97.6762	5.8	0.4
Hammerli et al., 2018 (Geology)	Granulite from the Yilgarn craton	TKN49-17	Igneous	2668	8	97.8261	5.8	0.5
Hammerli et al., 2018 (Geology)	Granulite from the Yilgarn craton	TKN49-14	Igneous	2681	6	97.5382	5.7	0.4
Hammerli et al., 2018 (Geology)	Granulite from the Yilgarn craton	TKN49-05	Igneous	2671	6	98.6896	5.6	0.5
Hammerli et al., 2018 (Geology)	Granulite from the Yilgarn craton	TKN49-11	Igneous	2681	6	96.3446	5.4	0.4
Hammerli et al., 2018 (Geology)	Granulite from the Yilgarn craton	TKN49-12	Igneous	2689	12	97.7687	5.2	0.5
Hammerli et al., 2018 (Geology)	Granulite from the Yilgarn craton	TKN58-01	Igneous	2980	10	99.2617	4.1	0.5
Hammerli et al., 2018 (Geology)	Granulite from the Yilgarn craton	TKN58-02_bis	Igneous	2991	10	99.6991	3.9	0.5
Hammerli et al., 2018 (Geology)	Granulite from the Yilgarn craton	TKN74-03	Igneous	2674	12	98.8033	3.9	0.5
Hammerli et al., 2018 (Geology)	Granulite from the Yilgarn craton	TKN58A-14R	Igneous	2848	12	98.9115	3.8	0.6
Hammerli et al., 2018 (Geology)	Granulite from the Yilgarn craton	TKN74-14	Igneous	2665	14	99.6998	3.8	0.5
Hammerli et al., 2018 (Geology)	Granulite from the Yilgarn craton	TKN74-16	Igneous	2676	22	97.5336	3.8	0.5
Hammerli et al., 2018 (Geology)	Granulite from the Yilgarn craton	TKN58-05	Igneous	2945	6	104.177	3.7	0.4
Hammerli et al., 2018 (Geology)	Granulite from the Yilgarn craton	TKN58A-2c	Igneous	2982	6	100.436	3.7	0.5
Hammerli et al., 2018 (Geology)	Granulite from the Yilgarn craton	TKN58A-3	Igneous	2992	6	98.8302	3.7	0.5
Hammerli et al., 2018 (Geology)	Granulite from the Yilgarn craton	TKN58A-10	Igneous	2976	12	99.832	3.7	0.6
Hammerli et al., 2018 (Geology)	Granulite from the Yilgarn craton	TKN58A-12C	Igneous	2983	6	99.7653	3.7	0.6
Hammerli et al., 2018 (Geology)	Granulite from the Yilgarn craton	TKN74-08	Igneous	2671	10	98.2404	3.7	0.5
Hammerli et al., 2018 (Geology)	Granulite from the Yilgarn craton	TKN74-11	Igneous	2666	8	99.8875	3.7	0.5
Hammerli et al., 2018 (Geology)	Granulite from the Yilgarn craton	TKN74-12	Igneous	2673	10	99.0647	3.7	0.5
Hammerli et al., 2018 (Geology)	Granulite from the Yilgarn craton	TKN74-17	Igneous	2673	16	99.177	3.7	0.5
Hammerli et al., 2018 (Geology)	Granulite from the Yilgarn craton	TKN58-15	Igneous	2983	8	97.888	3.6	0.5
Hammerli et al., 2018 (Geology)	Granulite from the Yilgarn craton	TKN58-18	Igneous	2964	8	96.7274	3.6	0.5
Hammerli et al., 2018 (Geology)	Granulite from the Yilgarn craton	TKN58A-9C	Igneous	2886	6	100.069	3.6	0.5
Hammerli et al., 2018 (Geology)	Granulite from the Yilgarn craton	TKN74-04	Igneous	2661	8	99.0229	3.6	0.5
Hammerli et al., 2018 (Geology)	Granulite from the Yilgarn craton	TKN74-13	Igneous	2684	14	100.224	3.6	0.5
Hammerli et al., 2018 (Geology)	Granulite from the Yilgarn craton	TKN74-15	Igneous	2671	12	100.337	3.6	0.5
Hammerli et al., 2018 (Geology)	Granulite from the Yilgarn craton	TKN58-06	Igneous	2976	10	99.9664	3.5	0.4
Hammerli et al., 2018 (Geology)	Granulite from the Yilgarn craton	TKN58-13	Igneous	2986	18	98.0576	3.5	0.6
Hammerli et al., 2018 (Geology)	Granulite from the Yilgarn craton	TKN58A-13C	Igneous	2975	8	99.8992	3.5	0.5
Hammerli et al., 2018 (Geology)	Granulite from the Yilgarn craton	TKN74-05	Igneous	2664	8	99.3994	3.5	0.5
Hammerli et al., 2018 (Geology)	Granulite from the Yilgarn craton	TKN74-07	Igneous	2672	14	99.4386	3.5	0.5
Hammerli et al., 2018 (Geology)	Granulite from the Yilgarn craton	TKN58-02	Igneous	2991	10	99.6991	3.4	0.5
Hammerli et al., 2018 (Geology)	Granulite from the Yilgarn craton	TKN58-08	Igneous	2950	8	100.271	3.4	0.5
Hammerli et al., 2018 (Geology)	Granulite from the Yilgarn craton	TKN58-10	Igneous	2960	12	95.9122	3.4	0.4
Hammerli et al., 2018 (Geology)	Granulite from the Yilgarn craton	TKN58-11	Igneous	2982	10	98.2562	3.4	0.5
Hammerli et al., 2018 (Geology)	Granulite from the Yilgarn craton	TKN58-14	Igneous	2979	12	98.7244	3.4	0.5
Hammerli et al., 2018 (Geology)	Granulite from the Yilgarn craton	TKN58A-7	Igneous	2967	6	100	3.4	0.5
Hammerli et al., 2018 (Geology)	Granulite from the Yilgarn craton	TKN74-06	Igneous	2868	18	97.629	3.4	0.5
Hammerli et al., 2018 (Geology)	Granulite from the Yilgarn craton	TKN74-10	Igneous	2673	10	99.8504	3.4	0.5
Hammerli et al., 2018 (Geology)	Granulite from the Yilgarn craton	TKN58A-11	Igneous	2872	14	99.4081	3.3	0.5
Hammerli et al., 2018 (Geology)	Granulite from the Yilgarn craton	TKN58-07	Igneous	2981	12	101.241	3.2	0.4
Hammerli et al., 2018 (Geology)	Granulite from the Yilgarn craton	TKN58A-15C	Igneous	2836	10	96.8265	3.2	0.5
Hammerli et al., 2018 (Geology)	Granulite from the Yilgarn craton	TKN58-12	Igneous	2987	8	98.1587	3	0.5
Hammerli et al., 2018 (Geology)	Granulite from the Yilgarn craton	TKN74-01	Igneous	3129	6	99.1371	3	0.5
Hammerli et al., 2018 (Geology)	Granulite from the Yilgarn craton	TKN58-09	Igneous	2967	10	99.3259	2.7	0.5
Hammerli et al., 2018 (Geology)	Granulite from the Yilgarn craton	TKN58A-1	Igneous	2865	6	98.3246	2.5	0.5
Hammerli et al., 2018 (Geology)	Granulite from the Yilgarn craton	TKN58A-5	Igneous	2868	6	99.5467	2.5	0.5
Hammerli et al., 2018 (Geology)	Granulite from the Yilgarn craton	TKN58A-2r	Igneous	2970	10	98.4512	2.3	0.5
Hammerli et al., 2018 (Geology)	Granulite from the Yilgarn craton	TKN58A-13R	Igneous	2856	12	98.2843	0.8	0.6
Hammerli et al., 2018 (Geology)	Granulite from the Yilgarn craton	TKN58A-9	Igneous	2803	6	100.036	0.5	0.5
Hammerli et al., 2018 (Geology)	Granulite from the Yilgarn craton	TKN58A-12R	Igneous	2795	6	97.6386	0.5	0.5
Hammerli et al., 2018 (Geology)	Granulite from the Yilgarn craton	TKN58A-8	Igneous	2711	6	97.0859	0.4	0.5
Hammerli et al., 2018 (Geology)	Granulite from the Yilgarn craton	TKN58A-6	Igneous	2814	6	99.9645	0.1	0.5
Hammerli et al., 2018 (Geology)	Granulite from the Yilgarn craton	TKN58-17	Igneous	2852	12	100.666	-0.1	0.5
Hammerli et al., 2018 (Geology)	Granulite from the Yilgarn craton	TKN58-16	Igneous	2910	6	98.9691	-0.3	0.6
Hammerli et al., 2018 (Geology)	Granulite from the Yilgarn craton	TKN58-19	Igneous	2879	6	99.0622	-0.5	0.5
Hiess et al., 2009 (Geochimica et Cosmochimica Acta)	Itsaq gneiss ℂ - Nuuk region	G01/113	Igneous	3856	10	100	6.3	0.8
Hiess et al., 2009 (Geochimica et Cosmochimica Acta)	Itsaq gneiss ℂ - Nuuk region	G01/36	Igneous	3824	12	99	6.2	2
Hiess et al., 2009 (Geochimica et Cosmochimica Acta)	Itsaq gneiss ℂ - Nuuk region	G01/36	Igneous	3881	16	100	6.2	1
Hiess et al., 2009 (Geochimica et Cosmochimica Acta)	Itsaq gneiss ℂ - Nuuk region	G01/36	Igneous	3876	14	99	6.2	1
Hiess et al., 2009 (Geochimica et Cosmochimica Acta)	Itsaq gneiss ℂ - Nuuk region	G01/36	Igneous	3719	12	97	6.1	2
Hiess et al., 2009 (Geochimica et Cosmochimica Acta)	Itsaq gneiss ℂ - Nuuk region	G01/36	Igneous	3874	18	100	6	1
Hiess et al., 2009 (Geochimica et Cosmochimica Acta)	Itsaq gneiss ℂ - Nuuk region	G01/36	Igneous	3651	10	99	5.8	1.4
Hiess et al., 2009 (Geochimica et Cosmochimica Acta)	Itsaq gneiss ℂ - Nuuk region	G01/36	Igneous	3914	16	99	5.8	1
Hiess et al., 2009 (Geochimica et Cosmochimica Acta)	Itsaq gneiss ℂ - Nuuk region	G01/36	Igneous	3878	14	100	5.8	1
Hiess et al., 2009 (Geochimica et Cosmochimica Acta)	Itsaq gneiss ℂ - Nuuk region	G01/36	Igneous	3886	14	102	5.7	1
Hiess et al., 2009 (Geochimica et Cosmochimica Acta)	Itsaq gneiss ℂ - Nuuk region	G01/36	Igneous	3867	8	100	5.6	2
Hiess et al., 2009 (Geochimica et Cosmochimica Acta)	Itsaq gneiss ℂ - Nuuk region	G01/113	Igneous	3863	14	102	5.6	0.8
Hiess et al., 2009 (Geochimica et Cosmochimica Acta)	Itsaq gneiss ℂ - Nuuk region	G97/118	Igneous	3714	12	96	5.6	1.2
Hiess et al., 2009 (Geochimica et Cosmochimica Acta)	Itsaq gneiss ℂ - Nuuk region	G97/118	Igneous	3806	10	95	5.6	1.2
Hiess et al., 2009 (Geochimica et Cosmochimica Acta)	Itsaq gneiss ℂ - Nuuk region	G97/118	Igneous	3817	8	102	5.5	1.2
Hiess et al., 2009 (Geochimica et Cosmochimica Acta)	Itsaq gneiss ℂ - Nuuk region	248202	Igneous	3801	8	100	5.5	0.8
Hiess et al., 2009 (Geochimica et Cosmochimica Acta)	Itsaq gneiss ℂ - Nuuk region	248202	Igneous	3807	6	101	5.5	0.8
Hiess et al., 2009 (Geochimica et Cosmochimica Acta)	Itsaq gneiss ℂ - Nuuk region	G01/36	Igneous	3846	18	99	5.4	1.4
Hiess et al., 2009 (Geochimica et Cosmochimica Acta)	Itsaq gneiss ℂ - Nuuk region	G01/36	Igneous	3882	18	98	5.4	0.8
Hiess et al., 2009 (Geochimica et Cosmochimica Acta)	Itsaq gneiss ℂ - Nuuk region	G01/36	Igneous	3846	12	100	5.4	1
Hiess et al., 2009 (Geochimica et Cosmochimica Acta)	Itsaq gneiss ℂ - Nuuk region	G01/36	Igneous	3829	20	98	5.4	1
Hiess et al., 2009 (Geochimica et Cosmochimica Acta)	Itsaq gneiss ℂ - Nuuk region	G01/36	Igneous	3838	14	98	5.4	1
Hiess et al., 2009 (Geochimica et Cosmochimica Acta)	Itsaq gneiss ℂ - Nuuk region	2487228	Igneous	3710	8	101	5.4	0.6
Hiess et al., 2009 (Geochimica et Cosmochimica Acta)	Itsaq gneiss ℂ - Nuuk region	2487228	Igneous	3681	10	101	5.4	0.6
Hiess et al., 2009 (Geochimica et Cosmochimica Acta)	Itsaq gneiss ℂ - Nuuk region	248202	Igneous	3806	10	98	5.4	0.8
Hiess et al., 2009 (Geochimica et Cosmochimica Acta)	Itsaq gneiss ℂ - Nuuk region	248202	Igneous	3799	10	98	5.4	0.8
Hiess et al., 2009 (Geochimica et Cosmochimica Acta)	Itsaq gneiss ℂ - Nuuk region	248203	Igneous	3806	6	100	5.4	0.8
Hiess et al., 2009 (Geochimica et Cosmochimica Acta)	Itsaq gneiss ℂ - Nuuk region	2487228	Igneous	3693	6	102	5.3	0.6
Hiess et al., 2009 (Geochimica et Cosmochimica Acta)	Itsaq gneiss ℂ - Nuuk region	2487228	Igneous	3702	10	99	5.3	0.6
Hiess et al., 2009 (Geochimica et Cosmochimica Acta)	Itsaq gneiss ℂ - Nuuk region	248202	Igneous	3804	8	100	5.3	0.8
Hiess et al., 2009 (Geochimica et Cosmochimica Acta)	Itsaq gneiss ℂ - Nuuk region	248203	Igneous	3801	6	98	5.3	0.8
Hiess et al., 2009 (Geochimica et Cosmochimica Acta)	Itsaq gneiss ℂ - Nuuk region	G01/36	Igneous	3723	24	97	5.2	1.4
Hiess et al., 2009 (Geochimica et Cosmochimica Acta)	Itsaq gneiss ℂ - Nuuk region	G01/36	Igneous	3879	16	102	5.2	1
Hiess et al., 2009 (Geochimica et Cosmochimica Acta)	Itsaq gneiss ℂ - Nuuk region	G01/113	Igneous	3808	6	101	5.2	0.8
Hiess et al., 2009 (Geochimica et Cosmochimica Acta)	Itsaq gneiss ℂ - Nuuk region	G97/118	Igneous	3816	10	100	5.2	0.6
Hiess et al., 2009 (Geochimica et Cosmochimica Acta)	Itsaq gneiss ℂ - Nuuk region	2487228	Igneous	3689	10	102	5.2	0.6
Hiess et al., 2009 (Geochimica et Cosmochimica Acta)	Itsaq gneiss ℂ - Nuuk region	2487228	Igneous	3701	8	100	5.2	0.6
Hiess et al., 2009 (Geochimica et Cosmochimica Acta)	Itsaq gneiss ℂ - Nuuk region	248202	Igneous	3800	8	99	5.2	0.8
Hiess et al., 2009 (Geochimica et Cosmochimica Acta)	Itsaq gneiss ℂ - Nuuk region	248202	Igneous	3789	6	101	5.2	0.8
Hiess et al., 2009 (Geochimica et Cosmochimica Acta)	Itsaq gneiss ℂ - Nuuk region	G01/36	Igneous	3706	16	95	5.1	1.4
Hiess et al., 2009 (Geochimica et Cosmochimica Acta)	Itsaq gneiss ℂ - Nuuk region	2487228	Igneous	3692	10	101	5.1	0.6
Hiess et al., 2009 (Geochimica et Cosmochimica Acta)	Itsaq gneiss ℂ - Nuuk region	248202	Igneous	3806	10	104	5.1	0.8
Hiess et al., 2009 (Geochimica et Cosmochimica Acta)	Itsaq gneiss ℂ - Nuuk region	248203	Igneous	3802	12	102	5.1	0.8
Hiess et al., 2009 (Geochimica et Cosmochimica Acta)	Itsaq gneiss ℂ - Nuuk region	G01/36	Igneous	3815	30	99	5	1.4
Hiess et al., 2009 (Geochimica et Cosmochimica Acta)	Itsaq gneiss ℂ - Nuuk region	G01/36	Igneous	3823	16	99	5	1.4
Hiess et al., 2009 (Geochimica et Cosmochimica Acta)	Itsaq gneiss ℂ - Nuuk region	G01/36	Igneous	3873	18	104	5	1.4
Hiess et al., 2009 (Geochimica et Cosmochimica Acta)	Itsaq gneiss ℂ - Nuuk region	G97/118	Igneous	3815	10	99	5	0.6
Hiess et al., 2009 (Geochimica et Cosmochimica Acta)	Itsaq gneiss ℂ - Nuuk region	G97/118	Igneous	3817	8	98	5	0.6
Hiess et al., 2009 (Geochimica et Cosmochimica Acta)	Itsaq gneiss ℂ - Nuuk region	G97/118	Igneous	3850	16	100	5	0.6
Hiess et al., 2009 (Geochimica et Cosmochimica Acta)	Itsaq gneiss ℂ - Nuuk region	248203	Igneous	3765	8	98	5	0.8
Hiess et al., 2009 (Geochimica et Cosmochimica Acta)	Itsaq gneiss ℂ - Nuuk region	248203	Igneous	3804	6	102	5	0.8
Hiess et al., 2009 (Geochimica et Cosmochimica Acta)	Itsaq gneiss ℂ - Nuuk region	G01/113	Igneous	3858	6	103	4.9	0.8
Hiess et al., 2009 (Geochimica et Cosmochimica Acta)	Itsaq gneiss ℂ - Nuuk region	2487228	Igneous	3686	10	101	4.9	0.6
Hiess et al., 2009 (Geochimica et Cosmochimica Acta)	Itsaq gneiss ℂ - Nuuk region	2487228	Igneous	3692	16	101	4.9	0.6
Hiess et al., 2009 (Geochimica et Cosmochimica Acta)	Itsaq gneiss ℂ - Nuuk region	248202	Igneous	3811	8	96	4.9	0.8
Hiess et al., 2009 (Geochimica et Cosmochimica Acta)	Itsaq gneiss ℂ - Nuuk region	248202	Igneous	3803	8	102	4.9	0.8
Hiess et al., 2009 (Geochimica et Cosmochimica Acta)	Itsaq gneiss ℂ - Nuuk region	248203	Igneous	3797	6	101	4.9	0.8
Hiess et al., 2009 (Geochimica et Cosmochimica Acta)	Itsaq gneiss ℂ - Nuuk region	G01/36	Igneous	3828	8	98	4.8	1.4
Hiess et al., 2009 (Geochimica et Cosmochimica Acta)	Itsaq gneiss ℂ - Nuuk region	G97/118	Igneous	3801	8	102	4.8	0.6
Hiess et al., 2009 (Geochimica et Cosmochimica Acta)	Itsaq gneiss ℂ - Nuuk region	248202	Igneous	3768	8	98	4.8	0.8
Hiess et al., 2009 (Geochimica et Cosmochimica Acta)	Itsaq gneiss ℂ - Nuuk region	248202	Igneous	3801	16	99	4.8	0.8
Hiess et al., 2009 (Geochimica et Cosmochimica Acta)	Itsaq gneiss ℂ - Nuuk region	248203	Igneous	3802	6	103	4.8	0.8
Hiess et al., 2009 (Geochimica et Cosmochimica Acta)	Itsaq gneiss ℂ - Nuuk region	248203	Igneous	3803	6	100	4.8	0.8
Hiess et al., 2009 (Geochimica et Cosmochimica Acta)	Itsaq gneiss ℂ - Nuuk region	248203	Igneous	3806	8	99	4.8	0.8
Hiess et al., 2009 (Geochimica et Cosmochimica Acta)	Itsaq gneiss ℂ - Nuuk region	G01/113	Igneous	3823	10	95	4.7	0.8
Hiess et al., 2009 (Geochimica et Cosmochimica Acta)	Itsaq gneiss ℂ - Nuuk region	G97/118	Igneous	3773	10	100	4.7	1.2
Hiess et al., 2009 (Geochimica et Cosmochimica Acta)	Itsaq gneiss ℂ - Nuuk region	G97/118	Igneous	3826	8	100	4.7	0.6
Hiess et al., 2009 (Geochimica et Cosmochimica Acta)	Itsaq gneiss ℂ - Nuuk region	G97/118	Igneous	3661	12	98	4.7	0.6
Hiess et al., 2009 (Geochimica et Cosmochimica Acta)	Itsaq gneiss ℂ - Nuuk region	2487228	Igneous	3688	8	100	4.7	0.6
Hiess et al., 2009 (Geochimica et Cosmochimica Acta)	Itsaq gneiss ℂ - Nuuk region	248202	Igneous	3802	8	99	4.7	0.8
Hiess et al., 2009 (Geochimica et Cosmochimica Acta)	Itsaq gneiss ℂ - Nuuk region	248203	Igneous	3802	6	101	4.7	0.8
Hiess et al., 2009 (Geochimica et Cosmochimica Acta)	Itsaq gneiss ℂ - Nuuk region	G01/36	Igneous	3904	10	102	4.6	1
Hiess et al., 2009 (Geochimica et Cosmochimica Acta)	Itsaq gneiss ℂ - Nuuk region	248202	Igneous	3806	10	98	4.6	0.8
Hiess et al., 2009 (Geochimica et Cosmochimica Acta)	Itsaq gneiss ℂ - Nuuk region	248203	Igneous	3796	6	98	4.6	0.8
Hiess et al., 2009 (Geochimica et Cosmochimica Acta)	Itsaq gneiss ℂ - Nuuk region	G01/36	Igneous	3868	36	96	4.5	1.4
Hiess et al., 2009 (Geochimica et Cosmochimica Acta)	Itsaq gneiss ℂ - Nuuk region	G01/113	Igneous	3878	6	100	4.5	0.8
Hiess et al., 2009 (Geochimica et Cosmochimica Acta)	Itsaq gneiss ℂ - Nuuk region	248202	Igneous	3809	4	101	4.5	0.8
Hiess et al., 2009 (Geochimica et Cosmochimica Acta)	Itsaq gneiss ℂ - Nuuk region	248202	Igneous	3803	6	99	4.5	0.8
Hiess et al., 2009 (Geochimica et Cosmochimica Acta)	Itsaq gneiss ℂ - Nuuk region	G01/36	Igneous	3909	12	101	4.4	1
Hiess et al., 2009 (Geochimica et Cosmochimica Acta)	Itsaq gneiss ℂ - Nuuk region	G01/113	Igneous	3864	6	99	4.4	0.8
Hiess et al., 2009 (Geochimica et Cosmochimica Acta)	Itsaq gneiss ℂ - Nuuk region	G01/36	Igneous	3895	12	99	4.3	1
Hiess et al., 2009 (Geochimica et Cosmochimica Acta)	Itsaq gneiss ℂ - Nuuk region	G01/36	Igneous	3890	16	99	4.3	1
Hiess et al., 2009 (Geochimica et Cosmochimica Acta)	Itsaq gneiss ℂ - Nuuk region	G01/113	Igneous	3855	12	97	4.3	0.8
Hiess et al., 2009 (Geochimica et Cosmochimica Acta)	Itsaq gneiss ℂ - Nuuk region	G97/118	Igneous	3815	10	98	4.3	1.2
Hiess et al., 2009 (Geochimica et Cosmochimica Acta)	Itsaq gneiss ℂ - Nuuk region	G01/36	Igneous	3892	20	98	4.2	1
Hiess et al., 2009 (Geochimica et Cosmochimica Acta)	Itsaq gneiss ℂ - Nuuk region	G01/113	Igneous	3856	10	102	4.2	0.8
Hiess et al., 2009 (Geochimica et Cosmochimica Acta)	Itsaq gneiss ℂ - Nuuk region	248203	Igneous	3810	6	100	4.2	0.8
Hiess et al., 2009 (Geochimica et Cosmochimica Acta)	Itsaq gneiss ℂ - Nuuk region	G01/36	Igneous	3869	38	98	4.1	1.4
Hiess et al., 2009 (Geochimica et Cosmochimica Acta)	Itsaq gneiss ℂ - Nuuk region	2487228	Igneous	3698	8	102	4.1	0.6
Hiess et al., 2009 (Geochimica et Cosmochimica Acta)	Itsaq gneiss ℂ - Nuuk region	2487228	Igneous	3699	8	101	4.1	0.6
Hiess et al., 2009 (Geochimica et Cosmochimica Acta)	Itsaq gneiss ℂ - Nuuk region	2487228	Igneous	3689	14	101	3.9	0.6
Hiess et al., 2011 (Contribution to Mineralogy and Petrology)	Itsaq gneiss ℂ - Nuuk region	G97/111_1.1	Igneous	3623	20	99	6.6	0.3
Hiess et al., 2011 (Contribution to Mineralogy and Petrology)	Itsaq gneiss ℂ - Nuuk region	G97/111_B-1.1	Igneous	3649	8	99	6.5	0.3
Hiess et al., 2011 (Contribution to Mineralogy and Petrology)	Itsaq gneiss ℂ - Nuuk region	G97/111_B-8.1	Igneous	3578	10	96	6.4	0.3
Hiess et al., 2011 (Contribution to Mineralogy and Petrology)	Itsaq gneiss ℂ - Nuuk region	G97/111_B-6.1	Igneous	3595	8	97	6.2	0.3
Hiess et al., 2011 (Contribution to Mineralogy and Petrology)	Itsaq gneiss ℂ - Nuuk region	G97/111_B-7.1	Igneous	3513	12	97	6.2	0.3
Hiess et al., 2011 (Contribution to Mineralogy and Petrology)	Itsaq gneiss ℂ - Nuuk region	G97/111_3.1	Igneous	3641	8	96	6	0.3
Hiess et al., 2011 (Contribution to Mineralogy and Petrology)	Itsaq gneiss ℂ - Nuuk region	G97/111_B-2.1	Igneous	3635	14	96	5.8	0.3
Hiess et al., 2011 (Contribution to Mineralogy and Petrology)	Itsaq gneiss ℂ - Nuuk region	G97/111_B-3.1	Igneous	3656	10	100	5.6	0.3
Hiess et al., 2011 (Contribution to Mineralogy and Petrology)	Itsaq gneiss ℂ - Nuuk region	G97/111_B-5.1	Igneous	3637	8	99	5.6	0.3
Hiess et al., 2011 (Contribution to Mineralogy and Petrology)	Itsaq gneiss ℂ - Nuuk region	248251_10.1	Igneous	3715	8	99	5.4	0.3
Hiess et al., 2011 (Contribution to Mineralogy and Petrology)	Itsaq gneiss ℂ - Nuuk region	195392_1.1	Igneous	3689	14	95	5.4	0.5
Hiess et al., 2011 (Contribution to Mineralogy and Petrology)	Itsaq gneiss ℂ - Nuuk region	195392_B-8.4	Igneous	3620	4	98	5.4	0.4
Hiess et al., 2011 (Contribution to Mineralogy and Petrology)	Itsaq gneiss ℂ - Nuuk region	195392_B-8.2	Igneous	3628	6	100	5.3	0.4
Hiess et al., 2011 (Contribution to Mineralogy and Petrology)	Itsaq gneiss ℂ - Nuuk region	248212_2.1	Igneous	3678	6	101	5.2	0.3
Hiess et al., 2011 (Contribution to Mineralogy and Petrology)	Itsaq gneiss ℂ - Nuuk region	248212_6.1	Igneous	3688	8	99	5.1	0.4
Hiess et al., 2011 (Contribution to Mineralogy and Petrology)	Itsaq gneiss ℂ - Nuuk region	195392_B-10.1	Igneous	3640	2	101	5.1	0.4
Hiess et al., 2011 (Contribution to Mineralogy and Petrology)	Itsaq gneiss ℂ - Nuuk region	195392_17.1	Igneous	2561	70	99	5.1	0.5
Hiess et al., 2011 (Contribution to Mineralogy and Petrology)	Itsaq gneiss ℂ - Nuuk region	248212_1.1	Igneous	3692	6	98	5	0.3
Hiess et al., 2011 (Contribution to Mineralogy and Petrology)	Itsaq gneiss ℂ - Nuuk region	248212_7.1	Igneous	3619	24	98	5	0.4
Hiess et al., 2011 (Contribution to Mineralogy and Petrology)	Itsaq gneiss ℂ - Nuuk region	195392_B-11.1	Igneous	3595	8	99	5	0.4
Hiess et al., 2011 (Contribution to Mineralogy and Petrology)	Itsaq gneiss ℂ - Nuuk region	195376_5.2	Igneous	2559	34	102	4.9	0.4
Hiess et al., 2011 (Contribution to Mineralogy and Petrology)	Itsaq gneiss ℂ - Nuuk region	248212_4.1	Igneous	3607	10	95	4.8	0.3
Hiess et al., 2011 (Contribution to Mineralogy and Petrology)	Itsaq gneiss ℂ - Nuuk region	248212_9.1	Igneous	3695	8	103	4.8	0.4
Hiess et al., 2011 (Contribution to Mineralogy and Petrology)	Itsaq gneiss ℂ - Nuuk region	195392_B-8.1	Igneous	2739	20	99	4.8	0.4
Hiess et al., 2011 (Contribution to Mineralogy and Petrology)	Itsaq gneiss ℂ - Nuuk region	195392_B-5.2	Igneous	2572	4	101	4.8	0.4
Hiess et al., 2011 (Contribution to Mineralogy and Petrology)	Itsaq gneiss ℂ - Nuuk region	195376_3.1	Igneous	2573	6	97	4.8	0.4
Hiess et al., 2011 (Contribution to Mineralogy and Petrology)	Itsaq gneiss ℂ - Nuuk region	VM97/07_3.1	Igneous	2824	14	96	4.7	0.5
Hiess et al., 2011 (Contribution to Mineralogy and Petrology)	Itsaq gneiss ℂ - Nuuk region	195392_B-1.2	Igneous	3684	2	102	4.7	0.4
Hiess et al., 2011 (Contribution to Mineralogy and Petrology)	Itsaq gneiss ℂ - Nuuk region	195376_4.1	Igneous	3071	14	96	4.6	0.4
Hiess et al., 2011 (Contribution to Mineralogy and Petrology)	Itsaq gneiss ℂ - Nuuk region	195392_16.1	Igneous	3729	36	97	4.5	0.5
Hiess et al., 2011 (Contribution to Mineralogy and Petrology)	Itsaq gneiss ℂ - Nuuk region	195392_B-3.1	Igneous	2660	12	99	4.5	0.4
Hiess et al., 2011 (Contribution to Mineralogy and Petrology)	Itsaq gneiss ℂ - Nuuk region	195392_12.1	Igneous	2572	34	102	4.5	0.5
Hiess et al., 2011 (Contribution to Mineralogy and Petrology)	Itsaq gneiss ℂ - Nuuk region	195392_B-1.1	Igneous	3663	8	97	4.4	0.4
Hiess et al., 2011 (Contribution to Mineralogy and Petrology)	Itsaq gneiss ℂ - Nuuk region	195392_5.1	Igneous	2546	62	95	4.4	0.5
Hiess et al., 2011 (Contribution to Mineralogy and Petrology)	Itsaq gneiss ℂ - Nuuk region	248251_10.2	Igneous	3709	4	99	4.3	0.3
Hiess et al., 2011 (Contribution to Mineralogy and Petrology)	Itsaq gneiss ℂ - Nuuk region	248212_5.1	Igneous	3702	6	98	4.3	0.4
Hiess et al., 2011 (Contribution to Mineralogy and Petrology)	Itsaq gneiss ℂ - Nuuk region	VM97/07_10.1	Igneous	2838	18	95	4.3	0.5
Hiess et al., 2011 (Contribution to Mineralogy and Petrology)	Itsaq gneiss ℂ - Nuuk region	195392_B-8.3	Igneous	2735	34	99	4.1	0.4
Hiess et al., 2011 (Contribution to Mineralogy and Petrology)	Itsaq gneiss ℂ - Nuuk region	195392_B-9.1	Igneous	2721	12	99	3.9	0.4
Hiess et al., 2011 (Contribution to Mineralogy and Petrology)	Itsaq gneiss ℂ - Nuuk region	195392_B-9.2	Igneous	2730	6	97	3.9	0.4
Hiess et al., 2011 (Contribution to Mineralogy and Petrology)	Itsaq gneiss ℂ - Nuuk region	VM97/07_2.1	Igneous	2807	22	101	3.8	0.5
Hiess et al., 2011 (Contribution to Mineralogy and Petrology)	Itsaq gneiss ℂ - Nuuk region	VM97/07_5.1	Igneous	2826	16	95	3.8	0.5
Hiess et al., 2011 (Contribution to Mineralogy and Petrology)	Itsaq gneiss ℂ - Nuuk region	195376_5.1	Igneous	2576	20	101	3.7	0.4
Hiess et al., 2011 (Contribution to Mineralogy and Petrology)	Itsaq gneiss ℂ - Nuuk region	195376_9.1	Igneous	3085	10	99	3.7	0.4
Hiess et al., 2011 (Contribution to Mineralogy and Petrology)	Itsaq gneiss ℂ - Nuuk region	195392_B-2.2	Igneous	2723	6	98	3.5	0.4
Hiess et al., 2011 (Contribution to Mineralogy and Petrology)	Itsaq gneiss ℂ - Nuuk region	195376_6.1	Igneous	2556	18	100	3.5	0.4
Hiess et al., 2011 (Contribution to Mineralogy and Petrology)	Itsaq gneiss ℂ - Nuuk region	248251_12.1	Igneous	3305	8	96	2.3	0.3
Hollis et al., 2014 (Geosphere)	Rum Jungle Complex (North Australia craton)	A06.1	Igneous	2539	12.6	99	7.46	0.11
Hollis et al., 2014 (Geosphere)	Rum Jungle Complex (North Australia craton)	A38.1	Igneous	2524	32	101	6.81	0.05
Hollis et al., 2014 (Geosphere)	Rum Jungle Complex (North Australia craton)	A05.2	Igneous	2532	34	96	6.62	0.1
Hollis et al., 2014 (Geosphere)	Rum Jungle Complex (North Australia craton)	A52.1	Igneous	2515	30	96	6.55	0.12
Hollis et al., 2014 (Geosphere)	Rum Jungle Complex (North Australia craton)	A40.1	Igneous	3107	30	97	6.5	0.14
Hollis et al., 2014 (Geosphere)	Rum Jungle Complex (North Australia craton)	A39.1	Igneous	2527	42	100	6.46	0.08
Hollis et al., 2014 (Geosphere)	Rum Jungle Complex (North Australia craton)	A05.1	Igneous	2553	22	100	6.43	0.09
Hollis et al., 2014 (Geosphere)	Rum Jungle Complex (North Australia craton)	A51.1	Igneous	2598	42	98	6.31	0.08
Hollis et al., 2014 (Geosphere)	Rum Jungle Complex (North Australia craton)	A09.1	Igneous	2903	30	95	6.28	0.06
Hollis et al., 2014 (Geosphere)	Rum Jungle Complex (North Australia craton)	A06.2	Igneous	2524	32	102	6.24	0.08
Hollis et al., 2014 (Geosphere)	Rum Jungle Complex (North Australia craton)	A12.1	Igneous	2564	34	101	6.24	0.11
Hollis et al., 2014 (Geosphere)	Rum Jungle Complex (North Australia craton)	A11.1	Igneous	2526	26	101	6	0.08
Hollis et al., 2014 (Geosphere)	Rum Jungle Complex (North Australia craton)	A46.1	Igneous	2879	36	100	5.54	0.11
Hollis et al., 2014 (Geosphere)	Rum Jungle Complex (North Australia craton)	A37.3	Igneous	2632	28	100	5.5	0.11
Hollis et al., 2014 (Geosphere)	Rum Jungle Complex (North Australia craton)	A57.1	Igneous	3122	13.8	101	4.83	0.1
Hollis et al., 2014 (Geosphere)	Rum Jungle Complex (North Australia craton)	A68.1	Igneous	3536	44	104	4.02	0.1
Hollis et al., 2014 (Geosphere)	Rum Jungle Complex (North Australia craton)	A59.1	Igneous	3409	24	101	3.83	0.12
Hollis et al., 2014 (Geosphere)	Rum Jungle Complex (North Australia craton)	A44.1	Igneous	3095	28	100	3.72	0.09
Hollis et al., 2014 (Geosphere)	Rum Jungle Complex (North Australia craton)	A10.1	Igneous	3159	16.2	99	3.68	0.06
Hollis et al., 2014 (Geosphere)	Rum Jungle Complex (North Australia craton)	A01.1	Igneous	3476	17.6	102	3.5	0.11
Hollis et al., 2014 (Geosphere)	Rum Jungle Complex (North Australia craton)	A53.1	Igneous	3037	42	101	3.12	0.06
Hollis et al., 2014 (Geosphere)	Rum Jungle Complex (North Australia craton)	A41.1	Igneous	3233	24	99	2.57	0.1
Hollis et al., 2014 (Geosphere)	Rum Jungle Complex (North Australia craton)	A03.1	Igneous	3047	24	101	2.5	0.06
Kitajima et al., 2012 (Chemical Geology)	Rhyolite, Panorama Formation, North Pole Dome (Pilbara Craton)	#68_core	Igneous	3702	55	98	5.93	0.37
Kitajima et al., 2012 (Chemical Geology)	Rhyolite, Panorama Formation, North Pole Dome (Pilbara Craton)	#61_core	Igneous	3489	40	94.5	5.89	0.37
Kitajima et al., 2012 (Chemical Geology)	Rhyolite, Panorama Formation, North Pole Dome (Pilbara Craton)	#82_core	Igneous	3355	52	97.1	5.86	0.3
Kitajima et al., 2012 (Chemical Geology)	Rhyolite, Panorama Formation, North Pole Dome (Pilbara Craton)	#59_core	Igneous	3425	39	94.5	5.8	0.37
Kitajima et al., 2012 (Chemical Geology)	Rhyolite, Panorama Formation, North Pole Dome (Pilbara Craton)	#73_core	Igneous	3410	56	98.9	5.79	0.62
Kitajima et al., 2012 (Chemical Geology)	Rhyolite, Panorama Formation, North Pole Dome (Pilbara Craton)	#67_core	Igneous	3350	57	95	5.74	0.37
Kitajima et al., 2012 (Chemical Geology)	Rhyolite, Panorama Formation, North Pole Dome (Pilbara Craton)	#56_core	Igneous	3609	39	101.6	5.73	0.37
Kitajima et al., 2012 (Chemical Geology)	Rhyolite, Panorama Formation, North Pole Dome (Pilbara Craton)	#71_core	Igneous	3636	55	97	5.59	0.62
Liu et al., 2009 (Chemical Geology)	North China craton	8.2Me-I	Igneous	2726	36	102.274	7	0.28
Liu et al., 2009 (Chemical Geology)	North China craton	10.1Me-I	Igneous	2774	50	95.3136	6.9	0.28
Liu et al., 2009 (Chemical Geology)	North China craton	1.2Me-I	Igneous	2798	36	96.9264	6.8	0.28
Liu et al., 2009 (Chemical Geology)	North China craton	3.1Me-I	Igneous	2779	28	101.547	6.8	0.28
Liu et al., 2009 (Chemical Geology)	North China craton	5.2Me-II	Igneous	2635	24	98.0645	6.4	0.28
Liu et al., 2009 (Chemical Geology)	North China craton	4.2Mg	Igneous	2738	30	101.132	5.7	0.28
Liu et al., 2009 (Chemical Geology)	North China craton	20.1Mg	Igneous	2949	30	102.374	5.5	0.31
Marschall et al., 2010 (Journal of Petrology)	Annandagstoppane Granite (East Antarctica)	Z7-29-6_35	Igneous	3057	12	99.739	7.8	0.2
Marschall et al., 2010 (Journal of Petrology)	Annandagstoppane Granite (East Antarctica)	Z7-30-1_19	Igneous	3049	10	104.741	7.7	0.3
Marschall et al., 2010 (Journal of Petrology)	Annandagstoppane Granite (East Antarctica)	Z7-30-1_23	Igneous	3065	2	99.2873	7.3	0.2
Marschall et al., 2010 (Journal of Petrology)	Annandagstoppane Granite (East Antarctica)	Z7-30-1_7	Igneous	3062	8	99.7394	7.2	0.2
Marschall et al., 2010 (Journal of Petrology)	Annandagstoppane Granite (East Antarctica)	Z7-29-11_12	Igneous	3076	8	100.359	7	0.2
Marschall et al., 2010 (Journal of Petrology)	Annandagstoppane Granite (East Antarctica)	Z7-30-1_4	Igneous	3067	8	99.4488	6.8	0.2
Marschall et al., 2010 (Journal of Petrology)	Annandagstoppane Granite (East Antarctica)	Z7-30-1_33	Igneous	3069	6	105.211	6.8	0.3
Marschall et al., 2010 (Journal of Petrology)	Annandagstoppane Granite (East Antarctica)	Z7-30-1_16	Igneous	3070	14	100.065	6.6	0.4
Marschall et al., 2010 (Journal of Petrology)	Annandagstoppane Granite (East Antarctica)	Z7-30-1_21	Igneous	3061	12	99.6095	6.6	0.3
Marschall et al., 2010 (Journal of Petrology)	Annandagstoppane Granite (East Antarctica)	Z7-29-10_39	Igneous	3062	6	101.29	6.4	0.2
Marschall et al., 2010 (Journal of Petrology)	Annandagstoppane Granite (East Antarctica)	Z7-30-1_22	Igneous	3067	8	98.3959	6.4	0.2
Marschall et al., 2010 (Journal of Petrology)	Annandagstoppane Granite (East Antarctica)	Z7-29-6_15	Igneous	3032	18	102.675	6	0.2
Marschall et al., 2010 (Journal of Petrology)	Annandagstoppane Granite (East Antarctica)	Z7-29-10_25	Igneous	3070	18	98.5554	6	0.3
Marschall et al., 2010 (Journal of Petrology)	Annandagstoppane Granite (East Antarctica)	Z7-30-1_13	Igneous	3019	14	100.667	6	0.2
Marschall et al., 2010 (Journal of Petrology)	Annandagstoppane Granite (East Antarctica)	Z7-30-1_32	Igneous	3059	6	99.7392	6	0.2
Marschall et al., 2010 (Journal of Petrology)	Annandagstoppane Granite (East Antarctica)	Z7-29-11_24	Igneous	3076	12	100.786	5.9	0.1
Marschall et al., 2010 (Journal of Petrology)	Annandagstoppane Granite (East Antarctica)	Z7-29-10_14	Igneous	3046	8	104.315	5.9	0.2
Marschall et al., 2010 (Journal of Petrology)	Annandagstoppane Granite (East Antarctica)	Z7-29-6_22	Igneous	3428	12	98.5907	5.7	0.2
Marschall et al., 2010 (Journal of Petrology)	Annandagstoppane Granite (East Antarctica)	Z7-29-7_12	Igneous	3283	10	99.3043	5.5	0.2
Marschall et al., 2010 (Journal of Petrology)	Annandagstoppane Granite (East Antarctica)	Z7-29-6_25	Igneous	3061	12	99.4477	5.4	0.3
Marschall et al., 2010 (Journal of Petrology)	Annandagstoppane Granite (East Antarctica)	Z7-29-6_34	Igneous	3079	4	101.718	5.4	0.2
Marschall et al., 2010 (Journal of Petrology)	Annandagstoppane Granite (East Antarctica)	Z7-29-10_43	Igneous	3045	10	105.327	5.2	0.2
Marschall et al., 2010 (Journal of Petrology)	Annandagstoppane Granite (East Antarctica)	Z7-29-10_24	Igneous	3283	10	101.296	5.1	0.2
Marschall et al., 2010 (Journal of Petrology)	Annandagstoppane Granite (East Antarctica)	Z7-29-7_7	Igneous	3438	6	105.073	5	0.1
Marschall et al., 2010 (Journal of Petrology)	Annandagstoppane Granite (East Antarctica)	Z7-29-7_43	Igneous	3425	10	100.263	5	0.2
Marschall et al., 2010 (Journal of Petrology)	Annandagstoppane Granite (East Antarctica)	Z7-29-6_2	Igneous	3270	12	104.607	4.7	0.2
Marschall et al., 2010 (Journal of Petrology)	Annandagstoppane Granite (East Antarctica)	Z7-29-7_10	Igneous	3175	12	99.2188	4.5	0.2
Marschall et al., 2010 (Journal of Petrology)	Annandagstoppane Granite (East Antarctica)	Z7-30-1_6	Igneous	3068	12	100.131	4.5	0.3
Marschall et al., 2010 (Journal of Petrology)	Annandagstoppane Granite (East Antarctica)	Z7-30-1_12	Igneous	3059	8	99.902	4.3	0.4
Marschall et al., 2010 (Journal of Petrology)	Annandagstoppane Granite (East Antarctica)	Z7-29-6_30	Igneous	3439	8	98.4822	4.2	0.3
Marschall et al., 2010 (Journal of Petrology)	Annandagstoppane Granite (East Antarctica)	Z7-29-6_18	Igneous	3223	8	99.8451	3.4	0.3
Nicoli et al., 2016 (Lithos)	Nagssugtoqidian Orogen (Southeastern Greenland)	Aup1-08	Igneous	2691.58	5.15	96.4757	8.1221	0.213274
Nicoli et al., 2016 (Lithos)	Nagssugtoqidian Orogen (Southeastern Greenland)	Aup1-08	Igneous	2810.47	9.44	98.0953	7.82578	0.15563
Nicoli et al., 2016 (Lithos)	Nagssugtoqidian Orogen (Southeastern Greenland)	Aup1-08	Igneous	2748.6	3.31	99.7788	6.96795	0.26549
Nicoli et al., 2016 (Lithos)	Nagssugtoqidian Orogen (Southeastern Greenland)	Aup1-08	Igneous	2687.42	13.32	99.3886	6.92827	0.195095
Nicoli et al., 2016 (Lithos)	Nagssugtoqidian Orogen (Southeastern Greenland)	Aup1-08	Igneous	2719.65	4.13	99.7437	6.63296	0.249522
Nicoli et al., 2016 (Lithos)	Nagssugtoqidian Orogen (Southeastern Greenland)	Aup1-08	Igneous	2748.5	10.19	98.5148	6.52936	0.23797
Nicoli et al., 2016 (Lithos)	Nagssugtoqidian Orogen (Southeastern Greenland)	Aup1-08	Igneous	2733.23	9.87	98.7882	6.48288	0.228414
Nicoli et al., 2016 (Lithos)	Nagssugtoqidian Orogen (Southeastern Greenland)	Aup1-08	Igneous	2700.71	6.38	96.2284	6.42278	0.156687
Nicoli et al., 2016 (Lithos)	Nagssugtoqidian Orogen (Southeastern Greenland)	Aup1-08	Igneous	2755.74	7.69	96.8157	6.28978	0.212872
Nicoli et al., 2016 (Lithos)	Nagssugtoqidian Orogen (Southeastern Greenland)	Aup1-08	Igneous	2745.31	4.46	99.2489	6.22721	0.16755
Nicoli et al., 2016 (Lithos)	Nagssugtoqidian Orogen (Southeastern Greenland)	Aup1-08	Igneous	2778.56	19.53	100.504	6.1926	0.176273
Nicoli et al., 2016 (Lithos)	Nagssugtoqidian Orogen (Southeastern Greenland)	Aup1-08	Igneous	2867.26	15.28	101.678	6.12508	0.248868
Nicoli et al., 2016 (Lithos)	Nagssugtoqidian Orogen (Southeastern Greenland)	Aup1-08	Igneous	2721.48	10.25	98.7455	6.07116	0.256302
Nicoli et al., 2016 (Lithos)	Nagssugtoqidian Orogen (Southeastern Greenland)	Aup1-08	Igneous	3029.28	6.71	98.7152	5.96473	0.202922
Nicoli et al., 2016 (Lithos)	Nagssugtoqidian Orogen (Southeastern Greenland)	Aup1-08	Igneous	2773.89	5.41	98.5479	5.93657	0.27009
Nicoli et al., 2016 (Lithos)	Nagssugtoqidian Orogen (Southeastern Greenland)	Aup1-08	Igneous	2843.24	5.57	99.3332	5.8321	0.313436
Nicoli et al., 2016 (Lithos)	Nagssugtoqidian Orogen (Southeastern Greenland)	Aup1-08	Igneous	2739.62	6.66	97.8307	5.82024	0.217346
Nicoli et al., 2016 (Lithos)	Nagssugtoqidian Orogen (Southeastern Greenland)	Aup1-08	Igneous	2774.24	11.52	99.2016	5.76682	0.200056
Nicoli et al., 2016 (Lithos)	Nagssugtoqidian Orogen (Southeastern Greenland)	Aup1-08	Igneous	2711.59	6.28	99.5272	5.63561	0.193165
Nicoli et al., 2016 (Lithos)	Nagssugtoqidian Orogen (Southeastern Greenland)	Aup1-08	Igneous	2702.4	6.35	99.4982	5.1431	0.205216
Nicoli et al., 2016 (Lithos)	Nagssugtoqidian Orogen (Southeastern Greenland)	Aup1-05	Igneous	2685.07	5.22	96.8332	4.94791	0.278054
Reimink et al., 2014 (Nature Geoscience)	Slave craton, Canada	S1425 48-2	Igneous	3990	6	98.8117	6.40466	0.33886
Reimink et al., 2014 (Nature Geoscience)	Slave craton, Canada	S1425 47-5	Igneous	3441	4	95.8678	6.37839	0.141194
Reimink et al., 2014 (Nature Geoscience)	Slave craton, Canada	S1425 54-2	Igneous	3525	18	94.9482	6.3543	0.239714
Reimink et al., 2014 (Nature Geoscience)	Slave craton, Canada	S1425 72-2	Igneous	3493	10	97.0663	6.34843	0.163189
Reimink et al., 2014 (Nature Geoscience)	Slave craton, Canada	S1425 52-3	Igneous	4019	8	101.543	6.29647	0.23427
Reimink et al., 2014 (Nature Geoscience)	Slave craton, Canada	S1425 69-2	Igneous	3959	4	100.925	6.21979	0.18352
Reimink et al., 2014 (Nature Geoscience)	Slave craton, Canada	S1425 62-4	Igneous	3303	26	99.0663	6.19597	0.187409
Reimink et al., 2014 (Nature Geoscience)	Slave craton, Canada	S1425 58-3	Igneous	3318	8	97.5571	6.19177	0.244225
Reimink et al., 2014 (Nature Geoscience)	Slave craton, Canada	S1425 38-3	Igneous	3945	8	97.0183	6.13559	0.168205
Reimink et al., 2014 (Nature Geoscience)	Slave craton, Canada	S1425 57-4	Igneous	3559	14	95.519	6.11199	0.250854
Reimink et al., 2014 (Nature Geoscience)	Slave craton, Canada	S1425 78-4	Igneous	4008	6	100.424	6.10966	0.274387
Reimink et al., 2014 (Nature Geoscience)	Slave craton, Canada	S1425 33-5	Igneous	3849	4	96.9225	6.0823	0.170003
Reimink et al., 2014 (Nature Geoscience)	Slave craton, Canada	S1425 50-2	Igneous	3989	2	97.8089	6.0756	0.275461
Reimink et al., 2014 (Nature Geoscience)	Slave craton, Canada	S1425 63-3	Igneous	3877	8	96.6703	6.06723	0.17819
Reimink et al., 2014 (Nature Geoscience)	Slave craton, Canada	S1425 41-5	Igneous	3902	8	99.4573	6.03449	0.176866
Reimink et al., 2014 (Nature Geoscience)	Slave craton, Canada	S1425 48-1	Igneous	3981	12	99.7331	6.01727	0.367304
Reimink et al., 2014 (Nature Geoscience)	Slave craton, Canada	S1425 53-4	Igneous	3980	4	100.218	5.90708	0.263374
Reimink et al., 2014 (Nature Geoscience)	Slave craton, Canada	S1425 75-1	Igneous	4005	4	99.2253	5.88447	0.289551
Reimink et al., 2014 (Nature Geoscience)	Slave craton, Canada	S1425 46-4	Igneous	3972	2	99.7075	5.88221	0.179347
Reimink et al., 2014 (Nature Geoscience)	Slave craton, Canada	S1425 34-8	Igneous	3987	22	99.7465	5.83178	0.199796
Reimink et al., 2014 (Nature Geoscience)	Slave craton, Canada	S1425 60-2	Igneous	4003	2	100.66	5.75053	0.229897
Reimink et al., 2014 (Nature Geoscience)	Slave craton, Canada	S1425 61-2	Igneous	4005	6	99.7271	5.57204	0.243604
Reimink et al., 2014 (Nature Geoscience)	Slave craton, Canada	S1425 78-3	Igneous	4013	14	97.9909	5.56222	0.241334
Reimink et al., 2014 (Nature Geoscience)	Slave craton, Canada	S1425 70-2	Igneous	3991	6	99.6215	5.52834	0.185299
Reimink et al., 2014 (Nature Geoscience)	Slave craton, Canada	S1425 47-6	Igneous	3985	4	99.337	5.44687	0.155
Reimink et al., 2014 (Nature Geoscience)	Slave craton, Canada	S1425 58-5	Igneous	3980	8	99.4078	5.42246	0.259948
Reimink et al., 2014 (Nature Geoscience)	Slave craton, Canada	S1425 66-3	Igneous	4014	4	98.7623	5.26261	0.185476
Reimink et al., 2014 (Nature Geoscience)	Slave craton, Canada	S1425 35-6	Igneous	4012	8	97.365	5.10163	0.179767
Reimink et al., 2014 (Nature Geoscience)	Slave craton, Canada	S1425 54-3	Igneous	3987	16	101.098	4.84362	0.252166
Reimink et al., 2014 (Nature Geoscience)	Slave craton, Canada	S1425 42-3	Igneous	4013	10	101.198	4.82322	0.166973
Reimink et al., 2014 (Nature Geoscience)	Slave craton, Canada	S1425 37-5	Igneous	3999	8	98.7406	4.79981	0.190585
Reimink et al., 2014 (Nature Geoscience)	Slave craton, Canada	S1425 57-2	Igneous	4009	10	98.8519	4.75188	0.247003
Reimink et al., 2014 (Nature Geoscience)	Slave craton, Canada	S1425 49-2	Igneous	3992	8	95.2138	4.7444	0.273405
Reimink et al., 2014 (Nature Geoscience)	Slave craton, Canada	S1425 43-3	Igneous	4017	8	100.454	4.71963	0.173799
Reimink et al., 2014 (Nature Geoscience)	Slave craton, Canada	S1425 65-3	Igneous	4008	44	99.2538	4.70067	0.213166
Reimink et al., 2014 (Nature Geoscience)	Slave craton, Canada	S1425 34-7	Igneous	3986	4	97.4181	4.69323	0.203478
Reimink et al., 2014 (Nature Geoscience)	Slave craton, Canada	S1425 68-1	Igneous	4003	12	95.6244	4.64644	0.176485
Reimink et al., 2014 (Nature Geoscience)	Slave craton, Canada	S1425 55-3	Igneous	3989	20	99.9599	4.63172	0.239378
Reimink et al., 2014 (Nature Geoscience)	Slave craton, Canada	S1425 75-3	Igneous	3993	14	96.2992	4.6294	0.250229
Reimink et al., 2014 (Nature Geoscience)	Slave craton, Canada	S1425 39-2	Igneous	4017	10	99.1908	4.60209	0.180742
Reimink et al., 2014 (Nature Geoscience)	Slave craton, Canada	S1425 77-3	Igneous	4014	4	100.088	4.59803	0.250807
Reimink et al., 2014 (Nature Geoscience)	Slave craton, Canada	S1425 72-1	Igneous	4017	10	98.9444	4.58739	0.190829
Reimink et al., 2014 (Nature Geoscience)	Slave craton, Canada	S1425 73-2	Igneous	3975	10	99.607	4.54001	0.188475
Reimink et al., 2014 (Nature Geoscience)	Slave craton, Canada	S1425 51-3	Igneous	4025	36	100.225	4.46719	0.26241
Reimink et al., 2014 (Nature Geoscience)	Slave craton, Canada	S1425 36-5	Igneous	3970	8	95.2552	4.44221	0.15814
Reimink et al., 2014 (Nature Geoscience)	Slave craton, Canada	S1425 41-4	Igneous	4012	8	100.333	4.38145	0.221528
Reimink et al., 2014 (Nature Geoscience)	Slave craton, Canada	S1425 46-7	Igneous	3993	6	98.5897	4.33584	0.147545
Reimink et al., 2016 (Nature Geoscience)	Slave craton, Canada	TC3/M1093/3	Igneous	3967.7	7.5	103.108	6.13559	0.161211
Reimink et al., 2016 (Nature Geoscience)	Slave craton, Canada	TC3/M1093/12	Igneous	4004	26	102.872	5.88221	0.172804
Reimink et al., 2016 (Nature Geoscience)	Slave craton, Canada	TC3/M1093/31	Igneous	4076.9	9.1	101.695	5.75053	0.21961
Reimink et al., 2016 (Nature Geoscience)	Slave craton, Canada	TC3/M1093/4	Igneous	3918	14	104.288	4.79981	0.184441
Reimink et al., 2016 (Nature Geoscience)	Slave craton, Canada	TC3/M1093/22	Igneous	3974	13	103.598	4.70067	0.203332
Reimink et al., 2016 (Nature Geoscience)	Slave craton, Canada	TC3/M1093/11	Igneous	3966.2	6.3	103.525	4.33584	0.139519
Wan et al., 2012 (Chemical Geology)	Anshan Area (North China craton)	A0713-5.1MA	Igneous	2521	0	98	9.35	0.53
Wan et al., 2012 (Chemical Geology)	Anshan Area (North China craton)	A9915-11.1RC	Igneous	3292	0	99	8.91	0.31
Wan et al., 2012 (Chemical Geology)	Anshan Area (North China craton)	A9915-12.1RC	Igneous	3321	0	98	8.43	0.21
Wan et al., 2012 (Chemical Geology)	Anshan Area (North China craton)	A0507-3.1MA	Igneous	3794	0	98	8.04	0.23
Wan et al., 2012 (Chemical Geology)	Anshan Area (North China craton)	A0520-1.1MA	Igneous	3381	0	97	7.14	0.2
Wan et al., 2012 (Chemical Geology)	Anshan Area (North China craton)	A0504-11.1MA	Igneous	3146	0	98	7	0.21
Wan et al., 2012 (Chemical Geology)	Anshan Area (North China craton)	A0510-2.1MA	Igneous	3349	0	99	6.94	0.13
Wan et al., 2012 (Chemical Geology)	Anshan Area (North China craton)	A0514-13.1TR	Igneous	3652	0	98	6.9	0.24
Wan et al., 2012 (Chemical Geology)	Anshan Area (North China craton)	A0520-2.1MA	Igneous	3333	0	96	6.79	0.2
Wan et al., 2012 (Chemical Geology)	Anshan Area (North China craton)	A0713-4.1MA	Igneous	2506	0	99	6.7	0.58
Wan et al., 2012 (Chemical Geology)	Anshan Area (North China craton)	A0518-6.1MA	Igneous	3807	0	100	6.69	0.16
Wan et al., 2012 (Chemical Geology)	Anshan Area (North China craton)	A9915-14.1RC	Igneous	3313	0	96	6.65	0.43
Wan et al., 2012 (Chemical Geology)	Anshan Area (North China craton)	A0512-9.1MA	Igneous	3763	0	99	6.6	0.14
Wan et al., 2012 (Chemical Geology)	Anshan Area (North China craton)	A0514-7.1MA	Igneous	3460	0	95	6.56	0.15
Wan et al., 2012 (Chemical Geology)	Anshan Area (North China craton)	A0713-1.1MA	Igneous	2501	0	97	6.51	0.44
Wan et al., 2012 (Chemical Geology)	Anshan Area (North China craton)	A0711-8.1IN	Igneous	3644	0	99	6.15	0.1
Wan et al., 2012 (Chemical Geology)	Anshan Area (North China craton)	A0518-11.1MA	Igneous	3748	0	98	6.08	0.23
Wan et al., 2012 (Chemical Geology)	Anshan Area (North China craton)	A0514-14.1MA	Igneous	3455	0	98	6.06	0.16
Wan et al., 2012 (Chemical Geology)	Anshan Area (North China craton)	A0509-11.1IN	Igneous	3714	0	98	6.03	0.31
Wan et al., 2012 (Chemical Geology)	Anshan Area (North China craton)	A0713-7.1MA	Igneous	2511	0	100	5.9	0.3
Wan et al., 2012 (Chemical Geology)	Anshan Area (North China craton)	A0505-3.1MA	Igneous	3143	0	100	5.87	0.18
Wan et al., 2012 (Chemical Geology)	Anshan Area (North China craton)	A0520-6.1MA	Igneous	3362	0	96	5.83	0.25
Wan et al., 2012 (Chemical Geology)	Anshan Area (North China craton)	A0708-6.1MA	Igneous	3317	0	99	5.79	0.22
Wan et al., 2012 (Chemical Geology)	Anshan Area (North China craton)	A0710-6.1MA	Igneous	3332	0	98	5.75	0.13
Wan et al., 2012 (Chemical Geology)	Anshan Area (North China craton)	A0510-5.1MA	Igneous	3350	0	97	5.74	0.11
Wan et al., 2012 (Chemical Geology)	Anshan Area (North China craton)	A0710-2.1RC	Igneous	3134	0	99	5.66	0.16
Wan et al., 2012 (Chemical Geology)	Anshan Area (North China craton)	A0708-7.1MA	Igneous	3307	0	99	5.64	0.41
Wan et al., 2012 (Chemical Geology)	Anshan Area (North China craton)	A0509-1.1MA	Igneous	3292	0	98	5.6	0.2
Wan et al., 2012 (Chemical Geology)	Anshan Area (North China craton)	A0710-8.1MA	Igneous	3327	0	99	5.59	0.22
Wan et al., 2012 (Chemical Geology)	Anshan Area (North China craton)	A0514-10.1TR	Igneous	3726	0	99	5.57	0.1
Wan et al., 2012 (Chemical Geology)	Anshan Area (North China craton)	A9915-6.1MA	Igneous	3322	0	99	5.49	0.35
Wan et al., 2012 (Chemical Geology)	Anshan Area (North China craton)	A0708-1.1MA	Igneous	3308	0	97	5.44	0.52
Wan et al., 2012 (Chemical Geology)	Anshan Area (North China craton)	A0711-7.1MA	Igneous	3286	0	100	5.43	0.16
Wan et al., 2012 (Chemical Geology)	Anshan Area (North China craton)	A0710-5.1MA	Igneous	3324	0	99	5.37	0.2
Wan et al., 2012 (Chemical Geology)	Anshan Area (North China craton)	A0514-6.1MA	Igneous	3450	0	97	5.35	0.18
Wan et al., 2012 (Chemical Geology)	Anshan Area (North China craton)	A9915-9.1MA	Igneous	3322	0	97	5.26	0.18
Wan et al., 2012 (Chemical Geology)	Anshan Area (North China craton)	A0711-4.1MA	Igneous	3304	0	99	5.19	0.15
Wan et al., 2012 (Chemical Geology)	Anshan Area (North China craton)	A0515-4.1MA	Igneous	3455	0	99	5.02	0.25
Wan et al., 2012 (Chemical Geology)	Anshan Area (North China craton)	A0708-5.1MA	Igneous	3297	0	98	5	0.44
Wan et al., 2012 (Chemical Geology)	Anshan Area (North China craton)	A0510-4.1MA	Igneous	3322	0	100	4.99	0.16
Wan et al., 2012 (Chemical Geology)	Anshan Area (North China craton)	A9915-8.1MA	Igneous	3323	0	99	4.99	0.57
Wan et al., 2012 (Chemical Geology)	Anshan Area (North China craton)	A0710-1.1MA	Igneous	3341	0	99	4.87	0.11
Wan et al., 2012 (Chemical Geology)	Anshan Area (North China craton)	A0710-7.1IN	Igneous	3655	0	100	4.83	0.15
Wan et al., 2012 (Chemical Geology)	Anshan Area (North China craton)	A9915-5.1RC	Igneous	3319	0	99	4.83	0.44
Wan et al., 2012 (Chemical Geology)	Anshan Area (North China craton)	A0711-3.1IN	Igneous	3636	0	98	4.82	0.12
Wan et al., 2012 (Chemical Geology)	Anshan Area (North China craton)	A0711-2.1MA	Igneous	3318	0	100	4.71	0.11
Wan et al., 2012 (Chemical Geology)	Anshan Area (North China craton)	A9915-2.1MA	Igneous	3326	0	99	4.69	0.2
Wan et al., 2012 (Chemical Geology)	Anshan Area (North China craton)	A9915-1.1MA	Igneous	3331	0	99	4.51	0.32
Wan et al., 2012 (Chemical Geology)	Anshan Area (North China craton)	A9915-13.1RC	Igneous	3329	0	100	4.42	0.14
Wan et al., 2012 (Chemical Geology)	Anshan Area (North China craton)	A0710-4.1RC	Igneous	3343	0	98	4.21	0.15
Wan et al., 2012 (Chemical Geology)	Anshan Area (North China craton)	A0711-5.1MA	Igneous	3302	0	98	4.15	0.14
Wan et al., 2012 (Chemical Geology)	Anshan Area (North China craton)	A0710-3.1MA	Igneous	3307	0	98	4.08	0.16
Wan et al., 2012 (Chemical Geology)	Anshan Area (North China craton)	A9915-7.1MA	Igneous	3357	0	99	3.39	0.33
Wan et al., 2012 (Chemical Geology)	Anshan Area (North China craton)	A0711-6.1IN	Igneous	3491	0	96	3.33	0.14
Wang et al., 2018 (Journal of Petrology)	Yinshan Block (North China Craton)	13ZLG43-1@29	Igneous	2519.5	10.4502	98.6924	9.27694	0.4
Wang et al., 2018 (Journal of Petrology)	Yinshan Block (North China Craton)	13ZLG43-1@22	Igneous	2517.45	11.7337	98.9265	9.27445	0.4
Wang et al., 2018 (Journal of Petrology)	Yinshan Block (North China Craton)	13ZLG43-1@34	Igneous	2526.77	29.526	96.42	9.25699	0.4
Wang et al., 2018 (Journal of Petrology)	Yinshan Block (North China Craton)	13ZLG36@34	Igneous	2522.72	8.84735	101.272	9.07344	0.4
Wang et al., 2018 (Journal of Petrology)	Yinshan Block (North China Craton)	13ZLG43-1@17	Igneous	2522.94	12.4759	99.0704	9.0256	0.4
Wang et al., 2018 (Journal of Petrology)	Yinshan Block (North China Craton)	13ZLG43-1@27	Igneous	2512.78	12.9556	98.9561	9.02111	0.4
Wang et al., 2018 (Journal of Petrology)	Yinshan Block (North China Craton)	13ZLG36@08	Igneous	2505.27	17.2196	97.3264	9.00163	0.4
Wang et al., 2018 (Journal of Petrology)	Yinshan Block (North China Craton)	13ZLG36@10	Igneous	2502.05	17.2173	97.2442	8.91087	0.4
Wang et al., 2018 (Journal of Petrology)	Yinshan Block (North China Craton)	13ZLG43-1@6	Igneous	2516.3	12.7686	99.2676	8.83808	0.4
Wang et al., 2018 (Journal of Petrology)	Yinshan Block (North China Craton)	13ZLG36@27	Igneous	2540.26	4.6199	100.506	8.77871	0.4
Wang et al., 2018 (Journal of Petrology)	Yinshan Block (North China Craton)	13ZLG36@39	Igneous	2518.6	14.1892	99.2286	8.53185	0.4
Wang et al., 2018 (Journal of Petrology)	Yinshan Block (North China Craton)	13ZLG36@14	Igneous	2529.7	5.32162	101.642	8.4376	0.4
Wang et al., 2018 (Journal of Petrology)	Yinshan Block (North China Craton)	13ZLG36@05	Igneous	2527.7	6.37189	100.666	8.33387	0.4
Wang et al., 2018 (Journal of Petrology)	Yinshan Block (North China Craton)	13ZLG43-1@9	Igneous	2516.22	16.4661	98.1161	7.99528	0.4
Wang et al., 2018 (Journal of Petrology)	Yinshan Block (North China Craton)	13ZLG43-1@5	Igneous	2550.92	25.6547	97.759	7.94989	0.4
Wang et al., 2018 (Journal of Petrology)	Yinshan Block (North China Craton)	13ZLG43-1@18	Igneous	2508.86	15.9409	97.9055	7.53996	0.4
Wang et al., 2018 (Journal of Petrology)	Yinshan Block (North China Craton)	13ZLG43-1@1	Igneous	2539.54	15.2816	99.2138	7.45717	0.4
Wang et al., 2018 (Journal of Petrology)	Yinshan Block (North China Craton)	13ZLG43-1@31	Igneous	2563.32	10.4729	97.906	7.19486	0.4
Wang et al., 2018 (Journal of Petrology)	Yinshan Block (North China Craton)	13ZLG43-1@28	Igneous	2557.21	24.1782	100.266	6.4488	0.4
Wang et al., 2018 (Journal of Petrology)	Yinshan Block (North China Craton)	13ZLG43-1@7	Igneous	2564.73	21.0677	96.6418	6.20693	0.4
Wang et al., 2018 (Journal of Petrology)	Yinshan Block (North China Craton)	13ZLG43-1@21	Igneous	2577	16.5824	96.9953	6.20593	0.4
Wang et al., 2018 (Journal of Petrology)	Yinshan Block (North China Craton)	13ZLG43-1@32	Igneous	2550.29	21.5047	97.9424	5.98101	0.4
